# Supplementary material for: Unusual catalytic strategy by non-heme Fe(ii)/2-oxoglutarate-dependent aspartyl hydroxylase AspH
Source: PubMed Central journal article supplement — Chem Sci. 2024 Feb 5;15(10):3466–84. doi: 10.1039/d3sc05974j (PMC10915816; doi:10.1039/d3sc05974j), 2024-02-05
Supplement: SC-015-D3SC05974J-s001.pdf [file SC-015-D3SC05974J-s001.pdf]

# Supplementary Information

## Unusual Catalytic Strategy by Non-Heme Fe(II)/2-Oxoglutarate-Dependent Aspartyl Hydroxylase AspH

Anandhu Krishnan,<sup>a</sup> Sadiq O. Waheed,<sup>a</sup> Fathima Hameed Cherilakkudy,<sup>a</sup> Ann Varghese,<sup>a</sup> Christopher  
J. Schofield,<sup>b</sup> Tatyana G. Karabancheva-Christova.<sup>a,\*</sup>

<sup>a</sup> Department of Chemistry, Michigan Technological University, Houghton, MI-49931, USA.

<sup>b</sup> Chemistry Research Laboratory, Department of Chemistry and the Ineos Oxford Institute for  
Antimicrobial Research, University of Oxford, Oxford, OX1 3TA, United Kingdom.

\* Corresponding author: Dr. Tatyana Karabancheva-Christova, [tatyanak@mtu.edu](mailto:tatyanak@mtu.edu)

|                                                                                                                                                                                                                                                                                    |    |
|------------------------------------------------------------------------------------------------------------------------------------------------------------------------------------------------------------------------------------------------------------------------------------|----|
| <b>Figure S1.</b> RMSD plot for Ferric-superoxo binding modes: A (productive, black) and B (unproductive, red) obtained from 1 $\mu$ s MD simulations. ....                                                                                                                        | 6  |
| <b>Figure S2.</b> RMSF plot for ferric-superoxo binding mode A. Residues 1-429 are AspH protein residues; 430-Fe, 431-O <sub>2</sub> , 432-2OG, 433-W1. Residues 434-472 are EGFD substrate residues; 451-Asp103 <sub>hFX</sub> . ..                                               | 7  |
| <b>Figure S3.</b> RMSF plot for ferric-superoxo bonding mode B. Residues 1-429 are AspH protein residues; 430-Fe, 431-O <sub>2</sub> , 432-2OG. Residues 433-471 are EGFD substrate residues; 450-Asp103 <sub>hFX</sub> . ....                                                     | 7  |
| <b>Figure S4.</b> Plot of distance the between the superoxide distal oxygen (O <sub>d</sub> ) and C2 of 2OG in superoxo binding modes: A (productive, black) and B (unproductive, red) obtained from 1 $\mu$ s MD simulations. .8                                                  | 8  |
| <b>Figure S5.</b> Protein interactions stabilizing the 2-oxoglutarate (2OG) cosubstrate in the AspH active site. ....                                                                                                                                                              | 8  |
| <b>Figure S6.</b> Hydrogen bond between the Fe coordinated water (W1) and the side chain carboxylate of Asp721. ....                                                                                                                                                               | 9  |
| <b>Figure S7.</b> Hydrogen bond between Asp721 side chain carboxylate and Fe coordinated water (W1) in the ferryl (black) and superoxo (red) complexes obtained from 1 $\mu$ s MD simulations. ....                                                                                | 9  |
| <b>Figure S8.</b> Salt bridge between the Arg686 side chain guanidium group and the Asp721 side chain carboxylate in the binding mode A (productive, red), binding mode B (unproductive, green) superoxo and ferryl (black) complexes obtained from 1 $\mu$ s MD simulations. .... | 10 |
| <b>Figure S9.</b> Salt bridge interactions stabilizing substrate (Asp103 <sub>hFX</sub> ) positioning in the AspH active site. ....                                                                                                                                                | 10 |
| <b>Figure S10.</b> Salt bridge between the Arg688 guanidium group and the Asp103 <sub>hFX</sub> carboxylate in the binding mode A (productive, red), binding mode B (unproductive, green) superoxo and ferryl (black) complexes obtained from 1 $\mu$ s MD simulations. ....       | 11 |
| <b>Figure S11.</b> Salt bridge between the Lys666 side chain amine and the Asp103 <sub>hFX</sub> carboxylate in the binding mode A (productive, red), binding mode B (unproductive, green) superoxo and ferryl (black) complexes obtained from 1 $\mu$ s MD simulations. ....      | 11 |
| <b>Figure S12.</b> Electrostatic interaction between the Arg686 guanidium group and the Asp103 <sub>hFX</sub> carboxylate in the binding mode A (productive, red), binding mode B (unproductive, green) superoxo and ferryl (black) complexes from 1 $\mu$ s MD simulations. ....  | 12 |
| <b>Figure S13.</b> Protein residues stabilizing the Cys 3-4 disulfide bridge in the AspH -EGFD ES complex. .12                                                                                                                                                                     | 12 |
| <b>Figure S14.</b> The AspH secondary structure based on PDB:5JZ8. ....                                                                                                                                                                                                            | 13 |
| <b>Figure S15.</b> Energy profile for dioxygen activation in superoxo binding mode A. ....                                                                                                                                                                                         | 14 |
| <b>Figure S16.</b> Optimized geometries for stationary points involved in dioxygen activation in the productive superoxo conformation. Asp103 is the hFX substrate residue undergoing hydroxylation. ....                                                                          | 15 |
| <b>Figure S17.</b> Energy profile for the dioxygen activation step in binding mode B. ....                                                                                                                                                                                         | 18 |
| <b>Figure S18.</b> Optimized geometries for stationary points involved in dioxygen activation in the binding mode B. ....                                                                                                                                                          | 18 |
| <b>Figure S19.</b> RMSD plot for the AspH WT ferryl complex obtained from 1 $\mu$ s MD simulation. ....                                                                                                                                                                            | 19 |
| <b>Figure S20.</b> RMSF plot for the ferryl complex. Residues 1-429 are AspH protein residues; 430-Fe, 431-O <sub>p</sub> , 432-SC, 433-W1. Residues 434-472 are EGFD substrate residues; 451-Asp103 <sub>hFX</sub> . ....                                                         | 19 |
| <b>Figure S21.</b> Plot of the distance between the ferryl O <sub>p</sub> and the pro-chiral hydrogen atoms (H <sub>R</sub> and H <sub>S</sub> ) of C3 of Asp103 <sub>hFX</sub> in the ferryl complex obtained from 1 $\mu$ s MD. ....                                             | 20 |
| <b>Figure S22.</b> Plot of the Fe-O <sub>p</sub> -H angle for the pro-chiral hydrogen atoms (H <sub>R</sub> and H <sub>S</sub> ) of C3 of Asp103 <sub>hFX</sub> in ferryl obtained from 1 $\mu$ s MD simulations. ....                                                             | 20 |

|                                                                                                                                                                                                                                                                                                                                                                                                                                                                                    |    |
|------------------------------------------------------------------------------------------------------------------------------------------------------------------------------------------------------------------------------------------------------------------------------------------------------------------------------------------------------------------------------------------------------------------------------------------------------------------------------------|----|
| <b>Figure S23.</b> Plots for hydrogen bonds between: A) Arg688 guanidium NH and the Fe coordinated water (W1), B) the Ser668 side chain hydroxyl and succinate C4 carboxylate oxygen in the ferryl complex, obtained from 1 $\mu$ s MD simulation. ....                                                                                                                                                                                                                            | 21 |
| <b>Figure S24.</b> Solvent-mediated (W2) bridging hydrogen bonding interaction between SCS residue Asp721 and the Fe(IV)=O (O <sub>p</sub> ). ....                                                                                                                                                                                                                                                                                                                                 | 21 |
| <b>Figure S25.</b> A) Plot for distance between Fe and O atom of W1 obtained from 5 ps QM/MM MD simulation. QM/MM energy scans for B) Fe-W1 bond dissociation. C) ligand exchange of W1 with other solvent water molecule (Ws). Reaction coordinate for B) is the distance between Fe and O <sub>W1</sub> . Reaction coordinate for C) is the difference between the Fe-O <sub>W1</sub> and Fe-O <sub>Ws</sub> distances (d1(Fe-O <sub>W1</sub> ) — d2(Fe-O <sub>Ws</sub> )). .... | 22 |
| <b>Figure S26.</b> QM/MM energy scans (snapshots 1-5) pro-R/S HAT step, calculated at the UB3LYP/def2-SVP level. Energy barriers calculated at B2 (red) and B3 (black) levels are provided. Reaction coordinate is defined as the difference between the O <sub>p</sub> -H <sub>R/S</sub> and C <sub>B</sub> -H <sub>R/S</sub> distances (d1(O <sub>p</sub> -H <sub>R/S</sub> ) — d2(C <sub>B</sub> -H <sub>R/S</sub> )). ....                                                     | 25 |
| <b>Figure S27.</b> Correlation plot for the pro-(R) HAT barrier versus the W1-Asp721 hydrogen bond distance. ....                                                                                                                                                                                                                                                                                                                                                                  | 27 |
| <b>Figure S28.</b> Correlation plot for the pro-(R) HAT reaction energy versus the W1-Asp721 hydrogen bond distance. ....                                                                                                                                                                                                                                                                                                                                                          | 27 |
| <b>Figure S29.</b> Correlation plot for the pro-(R) HAT barrier versus the W2-Asp721 hydrogen bond distance. ....                                                                                                                                                                                                                                                                                                                                                                  | 28 |
| <b>Figure S30.</b> Correlation plot for the pro-(R) HAT reaction energy versus the W2-Asp721 hydrogen bond distance. ....                                                                                                                                                                                                                                                                                                                                                          | 28 |
| <b>Figure S31.</b> Energy Decomposition Analysis of the HAT step based on Snapshot 1. Residues stabilizing/destabilizing IM4 over RC2 are marked in red. ....                                                                                                                                                                                                                                                                                                                      | 29 |
| <b>Figure S32.</b> SCS residues stabilizing (blue) and destabilizing (red) the IM4 relative to RC2. ....                                                                                                                                                                                                                                                                                                                                                                           | 29 |
| <b>Figure S33.</b> Superimposed structures of Fe center and Asp103 <sub>HFX</sub> in TS <sub>proR</sub> (green) and TS <sub>proS</sub> (red)....                                                                                                                                                                                                                                                                                                                                   | 30 |
| <b>Figure S34.</b> QM energy scan varying the N-C <sub>A</sub> -C <sub>B</sub> -C <sub>G</sub> dihedral angle, at the DFT/UB3LYP/def2-SVP level. Stationary points corresponding to TS <sub>proR</sub> and TS <sub>proS</sub> dihedral angles from snapshot 1 are marked in red. ....                                                                                                                                                                                              | 30 |
| <b>Figure S35.</b> Energy Decomposition Analysis of HAT step. Residues stabilizing/destabilizing TS <sub>proR</sub> over TS <sub>proS</sub> are marked in red. ....                                                                                                                                                                                                                                                                                                                | 31 |
| <b>Figure S36.</b> Second sphere residues contributing to stereoselectivity, as obtained from Energy Decomposition Analysis (EDA). Residues in blue stabilize, while residues in red destabilize TS <sub>proR</sub> over TS <sub>proS</sub> . SC-succinate ....                                                                                                                                                                                                                    | 31 |
| <b>Figure S37.</b> Residues showing positive (orange) and negative (cyan) correlated motion with Arg688 (blue). ....                                                                                                                                                                                                                                                                                                                                                               | 32 |
| <b>Figure S38.</b> Residues showing positive (orange) and negative (cyan) correlated motion with Asp721 (blue). ....                                                                                                                                                                                                                                                                                                                                                               | 32 |
| <b>Figure S39.</b> Residues showing positive (orange) and negative (cyan) correlated motions with Gln664 (blue). ....                                                                                                                                                                                                                                                                                                                                                              | 33 |
| <b>Figure S40.</b> Residues showing positive (orange) and negative (cyan) correlated motion with Lys666 (blue). ....                                                                                                                                                                                                                                                                                                                                                               | 33 |
| <b>Figure S41.</b> QM/MM energy scans (snapshots 1-5) for the rebound hydroxylation step, calculated at the UB3LYP/def2-SVP level. Energy barriers calculated at B2 (red) and B3 (black) are provided. Reaction coordinate is defined as the difference between the O <sub>p</sub> -C <sub>B</sub> and Fe-O <sub>p</sub> distances (d1(O <sub>p</sub> -C <sub>B</sub> ) — d2(Fe-O <sub>p</sub> )). ....                                                                            | 34 |
| <b>Figure S42.</b> Energy Decomposition Analysis of the rebound step based on Snapshot 1. Residues stabilizing/destabilizing TS <sub>REB</sub> are marked in red. ....                                                                                                                                                                                                                                                                                                             | 37 |

|                                                                                                                                                                                                                                                                                                                                                                  |    |
|------------------------------------------------------------------------------------------------------------------------------------------------------------------------------------------------------------------------------------------------------------------------------------------------------------------------------------------------------------------|----|
| <b>Figure S43.</b> Second sphere residues involved in rebound hydroxylation, obtained from Energy Decomposition Analysis (EDA). Residues in blue stabilize, while residues in red destabilizes $TS_{REB}$ . ...                                                                                                                                                  | 37 |
| <b>Figure S44.</b> Residues showing negative (cyan) and positive correlated motions (orange) with Asp741 (yellow). .....                                                                                                                                                                                                                                         | 38 |
| <b>Figure S45.</b> RMSD plot for AspH WT and the D721A mutant Fe(IV)=O complexes obtained from 1 $\mu$ s MD. ....                                                                                                                                                                                                                                                | 38 |
| <b>Figure S46.</b> $O_p$ - $C_B$ distance plot for AspH WT and the D721A mutant Fe(IV)=O complexes obtained from 1 $\mu$ s MD. ....                                                                                                                                                                                                                              | 39 |
| <b>Figure S47.</b> Fe- $O_p$ - $C_B$ angle plot for AspH WT and the D721A mutant Fe(IV)=O complexes obtained from 1 $\mu$ s MD. ....                                                                                                                                                                                                                             | 39 |
| <b>Figure S48.</b> A) PCA and B) DCCA plots for AspH WT and the D721A mutant ferryl complexes. Residues 1-429 are AspH protein residues; 430-Fe, 431- $O_p$ , 432- succinate, 433-W1, and 434-472 are EGFD substrate residues; 451-Asp103 <sub>hFX</sub> . The motion of the residues in PCA (part A) is indicated by the color change from yellow to blue. .... | 40 |
| <b>Figure S49.</b> QM/MM optimized structures of AspH WT (black), D721A (red), R688A (blue), K666A (cyan) mutants superimposed, showing Fe(IV)=O and hFX substrate positioning in the ferryl complex. SC-succinate. ....                                                                                                                                         | 41 |
| <b>Figure S50.</b> QM/MM energy scan for the HAT step for the D721A mutant calculated at the UB3LYP/def2-SVP level. Reaction coordinate is defined as the difference between the $O_p$ - $H_R$ and $C_B$ - $H_R$ distances ( $d1(O_p-H_R) - d2(C_B-H_R)$ ). ....                                                                                                 | 41 |
| <b>Figure S51.</b> A) RMSD. B) RMSF. C) $O_p$ - $C_B$ Distance. D) Fe- $O_p$ - $C_B$ angle plots for AspH WT and mutants - R688A, K666A from 1 $\mu$ s MD simulation. ....                                                                                                                                                                                       | 42 |
| <b>Figure S52.</b> QM/MM energy scans for the HAT step for mutants A) R688A. B) K666A calculated at the UB3LYP/def2SVP level. Reaction coordinate is defined as the difference between the $O_p$ - $H_R$ and $C_B$ - $H_R$ distances ( $d1(O_p-H_R) - d2(C_B-H_R)$ ). ....                                                                                       | 42 |
| <br>                                                                                                                                                                                                                                                                                                                                                             |    |
| <b>Scheme S1.</b> Mechanism of dioxygen activation in non-heme Fe(II)/2OG oxygenases. ....                                                                                                                                                                                                                                                                       | 14 |
| <br>                                                                                                                                                                                                                                                                                                                                                             |    |
| <b>Table S1.</b> Spin densities of stationary points involved in the HAT step. ....                                                                                                                                                                                                                                                                              | 23 |
| <b>Table S2.</b> Geometric features of stationary points involved in the HAT step. ....                                                                                                                                                                                                                                                                          | 24 |
| <b>Table S3.</b> Computed energy barriers with dispersion corrections (D3-BJ) for representative snapshots in the pro-(R) HAT step. ....                                                                                                                                                                                                                         | 26 |
| <b>Table S4.</b> Relationships between W2-Asp721-W1 hydrogen bond distances and the HAT barrier. ....                                                                                                                                                                                                                                                            | 26 |
| <b>Table S5.</b> Internal Electric Field (IEF) (in atomic units) calculated along the Fe=O direction for pro-R/S HAT steps. ....                                                                                                                                                                                                                                 | 34 |
| <b>Table S6.</b> Computed energy barriers with dispersion corrections (D3-BJ) for representative snapshots in the rebound hydroxylation step. ....                                                                                                                                                                                                               | 35 |
| <b>Table S7.</b> Spin densities of stationary points involved in the rebound hydroxylation step. ....                                                                                                                                                                                                                                                            | 35 |
| <b>Table S8.</b> Geometric parameters for stationary points involved in the rebound hydroxylation step. ....                                                                                                                                                                                                                                                     | 36 |
| <b>Table S9.</b> Key geometric parameters of the Fe(IV)=O intermediate for AspH WT and the D721A mutant, from 1 $\mu$ s MD simulations. ....                                                                                                                                                                                                                     | 40 |

|                                                                                                           |    |
|-----------------------------------------------------------------------------------------------------------|----|
| Conformational Dynamics of AspH Fe(III)-OO <sup>-</sup> ES complex (binding mode A)-additional details .. | 15 |
| Fe(III)-OO <sup>-</sup> DCCA-additional details .....                                                     | 15 |
| Mechanism of Dioxygen Activation (binding mode A)-additional details.....                                 | 16 |
| Cartesian Coordinates for the QM/MM Optimized Structures.....                                             | 43 |

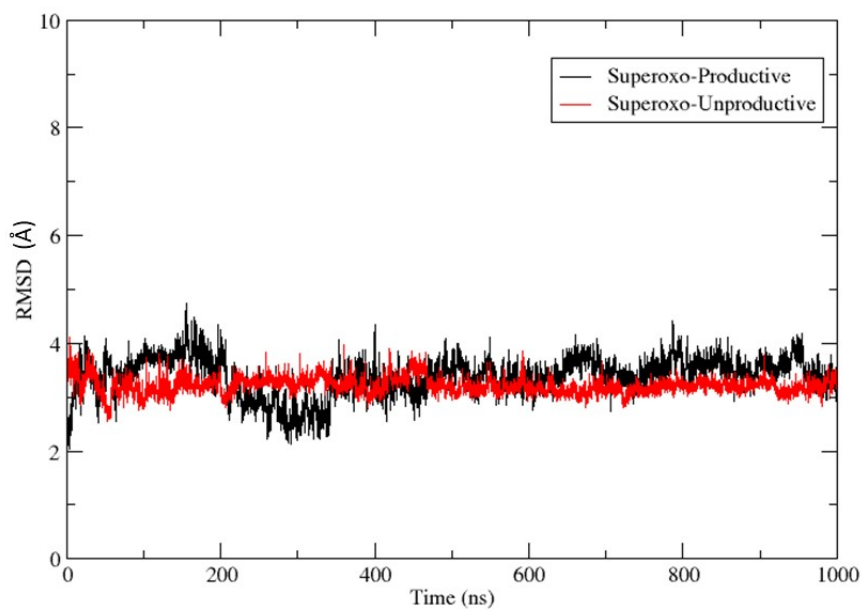

**Figure S1.** RMSD plot for Ferric-superoxo binding modes: A (productive, black) and B (unproductive, red) obtained from 1 $\mu$ s MD simulations.

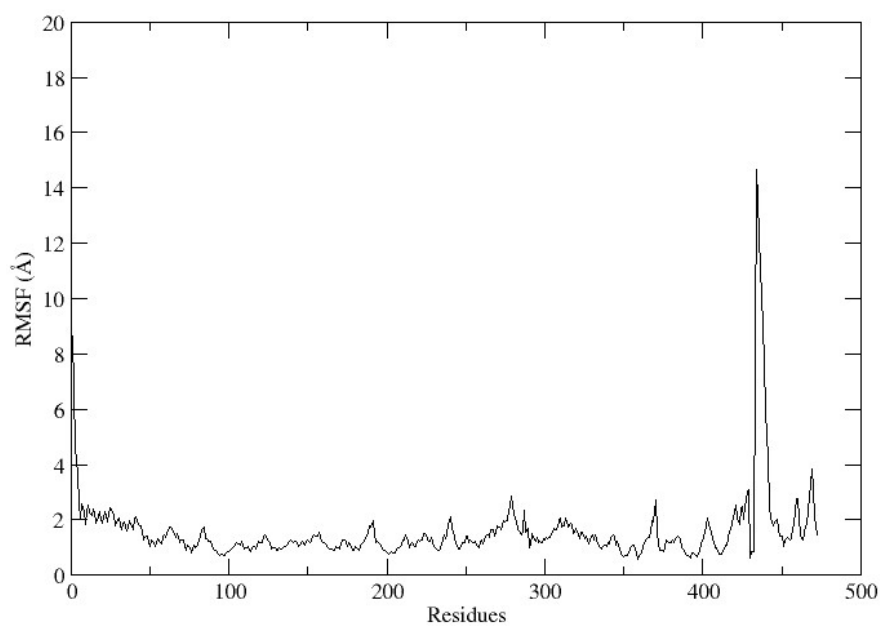

**Figure S2.** RMSF plot for ferric-superoxo binding mode A. Residues 1-429 are AspH protein residues; 430-Fe, 431-O<sub>2</sub>, 432-2OG, 433-W1. Residues 434-472 are EGFD substrate residues; 451-Asp103<sub>hFX</sub>.

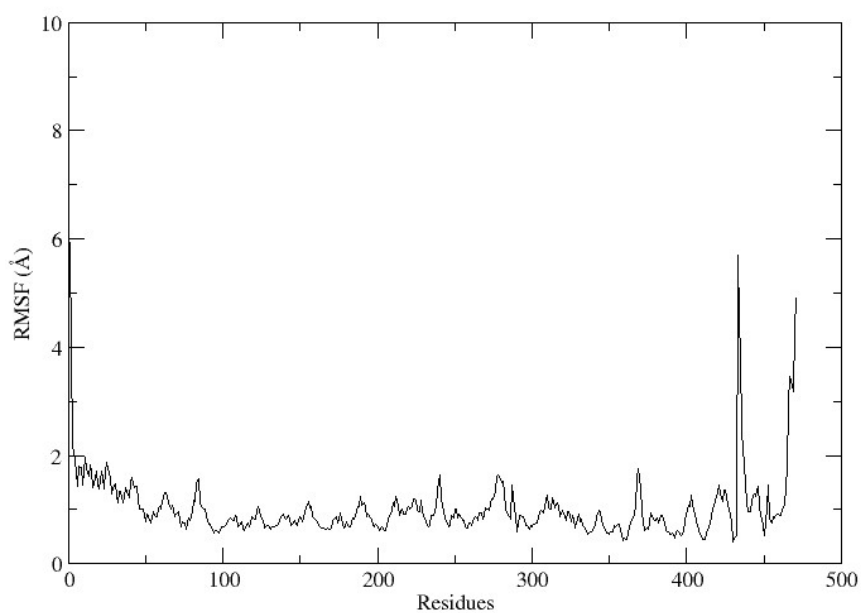

**Figure S3.** RMSF plot for ferric-superoxo bonding mode B. Residues 1-429 are AspH protein residues; 430-Fe, 431-O<sub>2</sub>, 432-2OG. Residues 433-471 are EGFD substrate residues; 450-Asp103<sub>hFX</sub>.





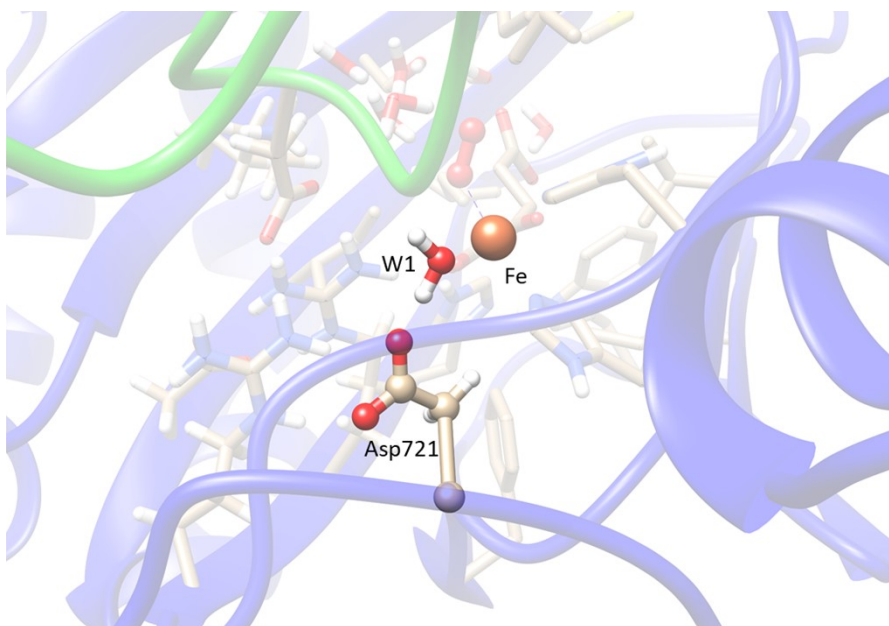

**Figure S6.** Hydrogen bond between the Fe coordinated water (W1) and the side chain carboxylate of Asp721.

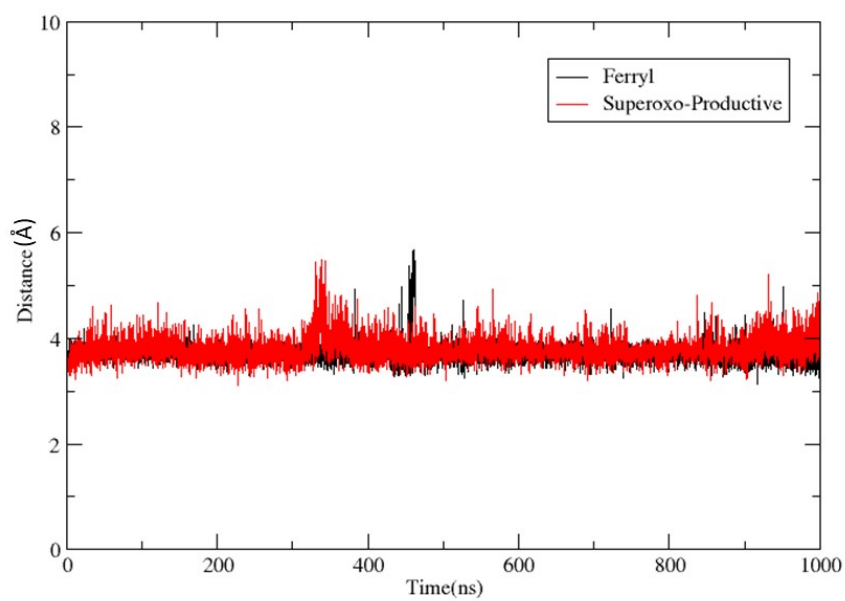

**Figure S7.** Hydrogen bond between Asp721 side chain carboxylate and Fe coordinated water (W1) in the ferryl (black) and superoxo (red) complexes obtained from 1 $\mu$ s MD simulations.

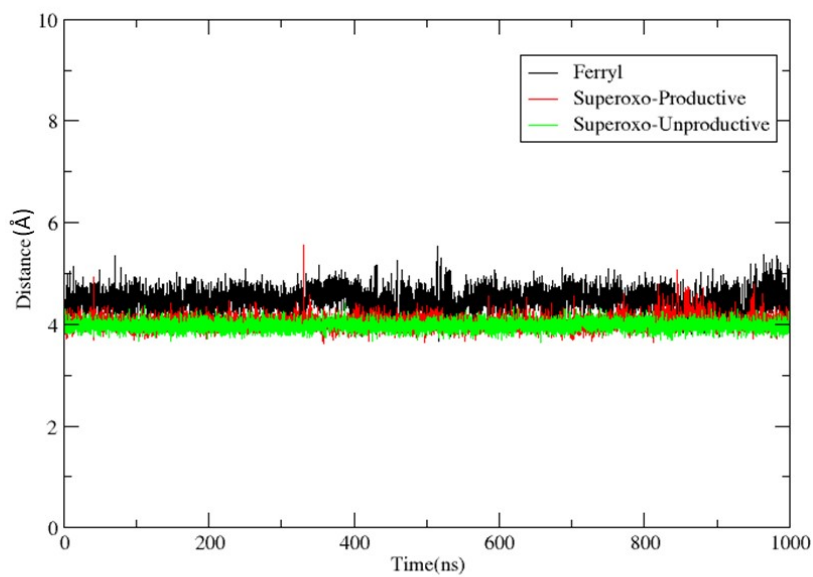

**Figure S8.** Salt bridge between the Arg686 side chain guanidium group and the Asp721 side chain carboxylate in the binding mode A (productive, red), binding mode B (unproductive, green) superoxo and ferryl (black) complexes obtained from 1 $\mu$ s MD simulations.

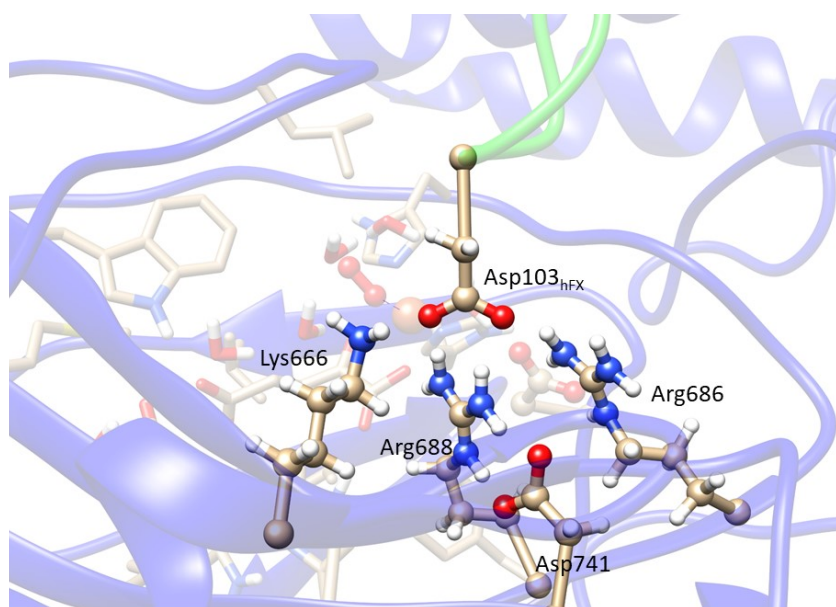

**Figure S9.** Salt bridge interactions stabilizing substrate (Asp103<sub>hFX</sub>) positioning in the AspH active site.

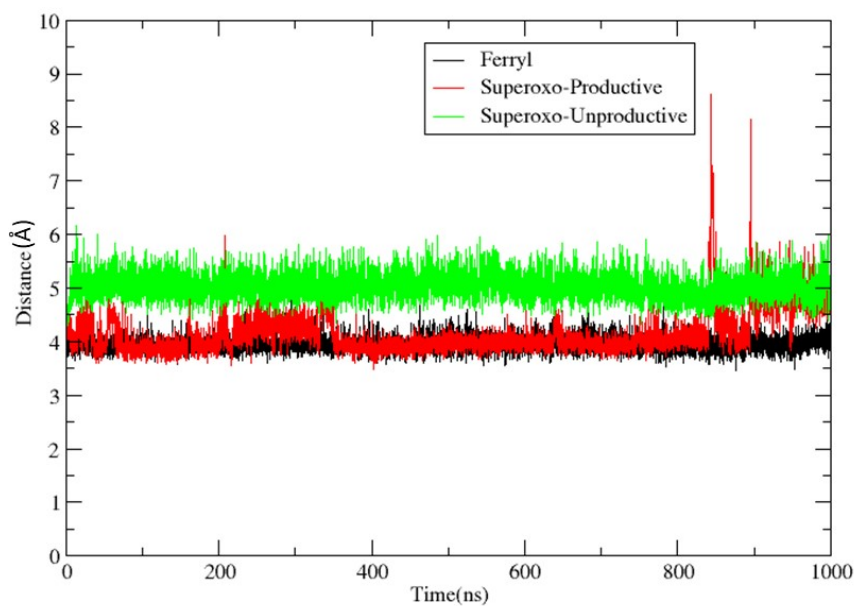

**Figure S10.** Salt bridge between the Arg688 guanidium group and the Asp103<sub>hFX</sub> carboxylate in the binding mode A (productive, red), binding mode B (unproductive, green) superoxo and ferryl (black) complexes obtained from 1 $\mu$ s MD simulations.

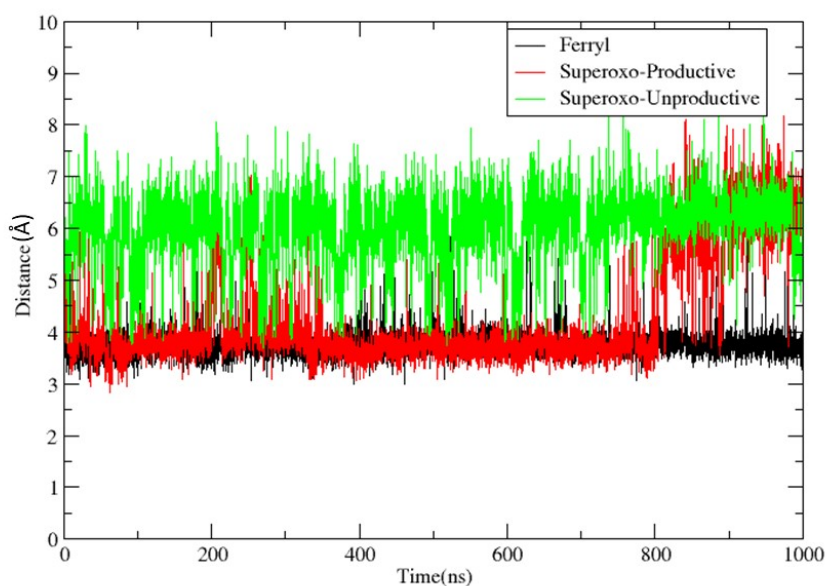

**Figure S11.** Salt bridge between the Lys666 side chain amine and the Asp103<sub>hFX</sub> carboxylate in the binding mode A (productive, red), binding mode B (unproductive, green) superoxo and ferryl (black) complexes obtained from 1 $\mu$ s MD simulations.

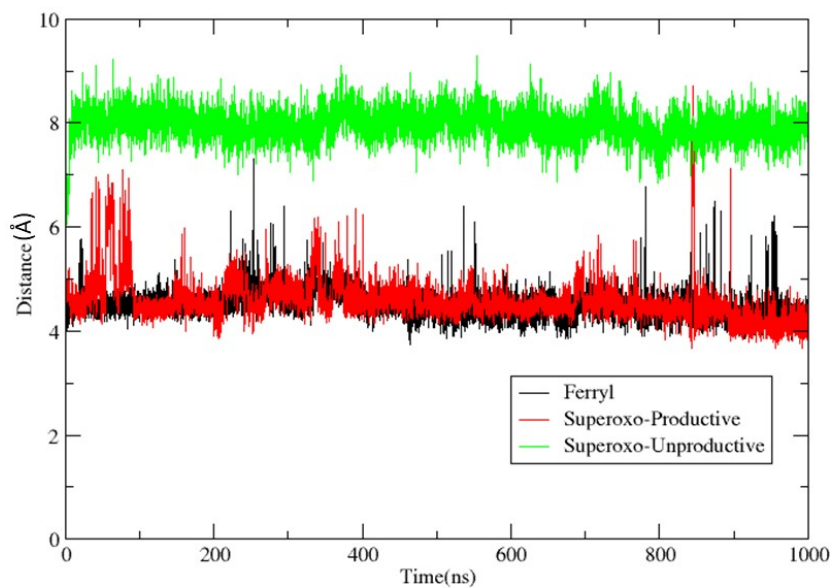

**Figure S12.** Electrostatic interaction between the Arg686 guanidium group and the Asp103<sub>hFX</sub> carboxylate in the binding mode A (productive, red), binding mode B (unproductive, green) superoxo and ferryl (black) complexes from 1 $\mu$ s MD simulations.

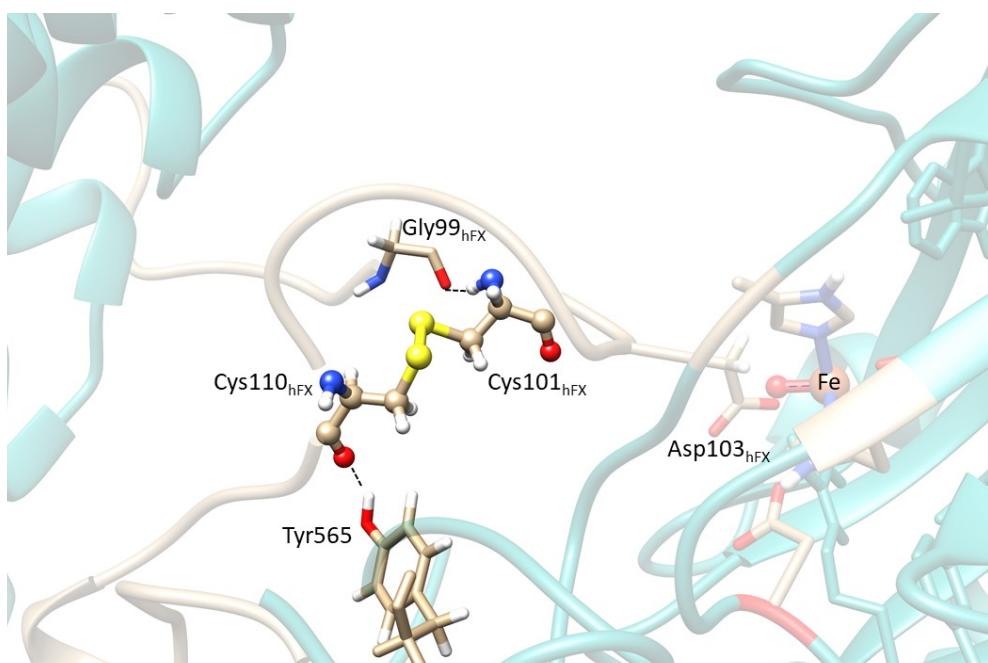

**Figure S13.** Protein residues stabilizing the Cys 3-4 disulfide bridge in the AspH-EGFD ES complex.

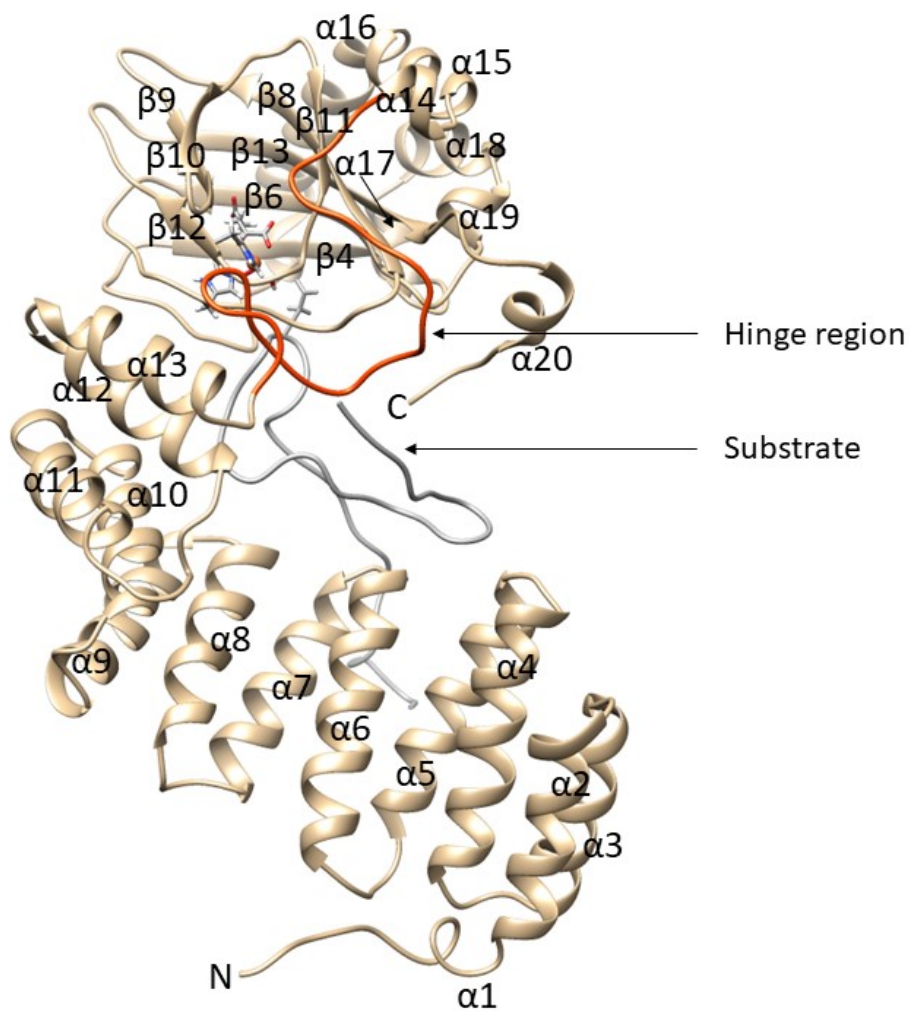

**Figure S14.** The AspH secondary structure based on PDB:5JZ8.

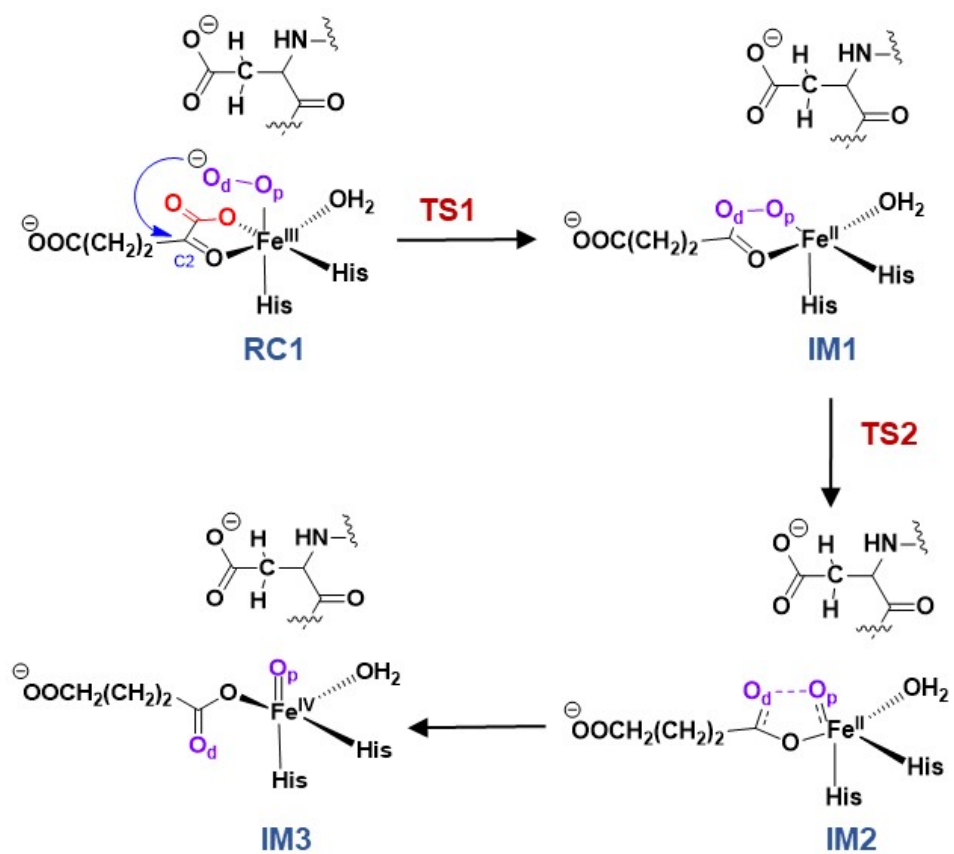

**Scheme S1.** Mechanism of dioxygen activation in non-heme Fe(II)/2OG oxygenases.

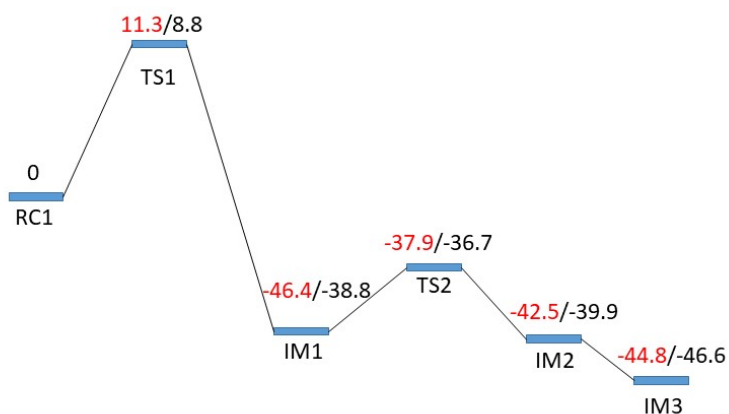

**Figure S15.** Energy profile for dioxygen activation in superoxo binding mode A.

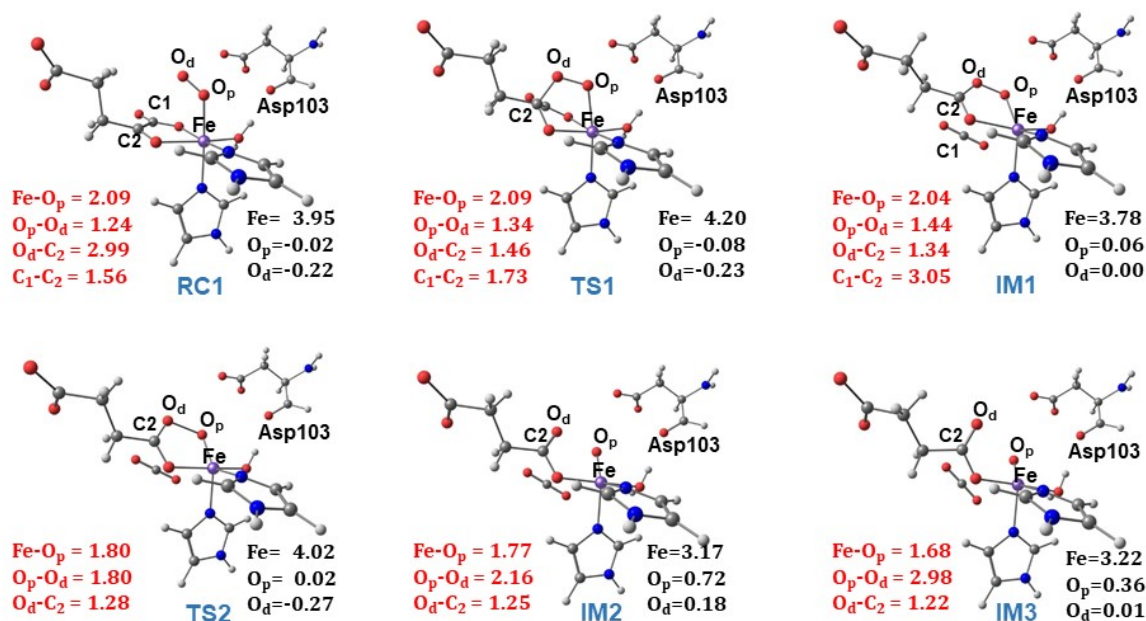

**Figure S16.** Optimized geometries for stationary points involved in dioxygen activation in the productive superoxo conformation. Asp103 is the hFX substrate residue undergoing hydroxylation.

### Conformational Dynamics of AspH Fe(III)-OO<sup>-</sup> ES complex (binding mode A)-additional details

In superoxo binding mode A, the Tyr108<sub>hFX</sub> side chain of the substrate is positioned for cation- $\pi/\pi$ - $\pi$  stacking with the sidechains of AspH TPR residues Arg526/Phe496. Other interactions involve hydrogen bonding of the Tyr108<sub>hFX</sub> side chain hydroxyl with His493 side chain imidazole nitrogen. The hydrophobic residues Tyr565, Pro682, and Ile758 stabilize the Cys101<sub>hFX</sub>-Cys110<sub>hFX</sub> disulfide bridge and help position Asp103<sub>hFX</sub> in the active site.

### Fe(III)-OO<sup>-</sup> DCCA-additional details

Tyr108<sub>hFX</sub> showed a positive correlation with TPR  $\alpha$ 6 and  $\alpha$ 7 helices, suggesting their potential importance for AspH reactivity through long-range interactions. A strong anti-correlated motion was observed between  $\alpha$ 1- $\alpha$ 5 helices of the TPR domain and  $\alpha$ 17- $\alpha$ 19 helices and  $\beta$ 4-

$\beta$ 6  $\beta$ -sheets of the OXY domain. Lys666 showed anticorrelation with the TPR  $\alpha$ 6 and  $\alpha$ 7 helices, suggesting a potential role in fine-tuning the substrate conformation for catalysis.

### **Mechanism of Dioxygen Activation (binding mode A)-additional details**

The geometric parameters and spin densities of the stationary points involved in dioxygen activation for binding mode A are provided in **Figure S16**. The reactant complex (RC1) is characterized by the following bond distances: Fe-O<sub>p</sub>, O<sub>p</sub>-O<sub>d</sub>, O<sub>d</sub>-C2, and C1-C2 bond distances are 2.09 Å, 1.24 Å, 2.99 Å and 1.56 Å, respectively. The calculated iron spin density is 3.95, indicating the Fe(III) oxidation state with four unpaired electrons on iron and the remaining one electron antiferromagnetically coupled to the superoxide radical.

The distal oxygen (O<sub>d</sub>) of the Fe(III)-O-O<sup>-</sup> moiety attacks the C2 of 2OG, resulting in CO<sub>2</sub> release and C1-C2 bond cleavage, forming Fe(II)-peroxysuccinic intermediate IM1 via TS1. The decarboxylation step has a calculated energy barrier of 8.86 kcal/mol relative to the Fe(III)-O-O<sup>-</sup> intermediate (RC1). In TS1, the O<sub>d</sub>-C2 distance decreases to 1.46 Å, and the O<sub>p</sub>-O<sub>d</sub> and C1-C2 bonds increase to 1.34 Å and 1.73 Å, respectively, indicating the formation of a partial bond between O<sub>d</sub> and C2 and weakening of the existing O<sub>p</sub>-O<sub>d</sub> and C1-C2 bonds. The TS1 spin density for iron slightly increases to 4.20, with O<sub>p</sub> and O<sub>d</sub> showing -0.08 and -0.23 spin densities, respectively. TS1 leads to a relatively stable peroxysuccinic intermediate (IM1) and CO<sub>2</sub> release. The Fe-O<sub>p</sub> and O<sub>p</sub>-O<sub>d</sub> bond distances elongate to 2.04 Å and 1.44 Å in IM1, respectively, while the O<sub>d</sub>-C2 distance reduces to 1.34 Å. The Fe spin density in IM1 changes to 3.78, indicating the Fe(II) character of the peroxysuccinic intermediate, where the spin densities of O<sub>p</sub> and O<sub>d</sub> are 0.06 and 0.00, respectively. TS1 is stabilized by a network of water-mediated hydrogen bonding interactions between (i) O<sub>p</sub> and the Asp103<sub>hFX</sub> side chain carboxylate, (ii) the Asp721 side chain carboxylate and Asp103<sub>hFX</sub> backbone carbonyl oxygen



(mediated by the Fe coordinated water), (iii) a hydrogen bond between 2OG C1 carboxylate and a Arg688 guanidium NH and, (iv) a salt bridge interaction between the Arg735 side chain guanidium and the 2OG C5 carboxylate. IM1 is exothermic, with an energy change of -38.92 kcal/mol relative to RC1 (**Figure S15**).

Following decarboxylation, the Fe(II)-peroxysuccinic intermediate IM1 converts to IM2 through homolytic O<sub>p</sub>-O<sub>d</sub> bond cleavage. The process is exothermic (relative to IM1) with a 2.04 kcal/mol activation energy barrier at the B3 level. In TS2, for the O<sub>p</sub>-O<sub>d</sub> bond cleavage step, the Fe-O<sub>p</sub> and O<sub>d</sub>-C2 distances are 1.80 Å and 1.28 Å, respectively, and the O<sub>p</sub>-O<sub>d</sub> distance is 1.80 Å. The Fe-O<sub>p</sub> bond becomes stronger with a partial double bond character in TS2. IM2 displays partial bonding between O<sub>d</sub> and O<sub>p</sub> (2.16 Å), which cleaves to form a more stable IM3. In IM3, the O<sub>p</sub>-O<sub>d</sub> bond is completely broken, and the Fe-O<sub>p</sub> double bond is formed with bond distances of 1.68 Å, 1.22 Å, and 3.22 Å for Fe-O<sub>p</sub>, O<sub>d</sub>-C2, and O<sub>p</sub>-O<sub>d</sub>, respectively.

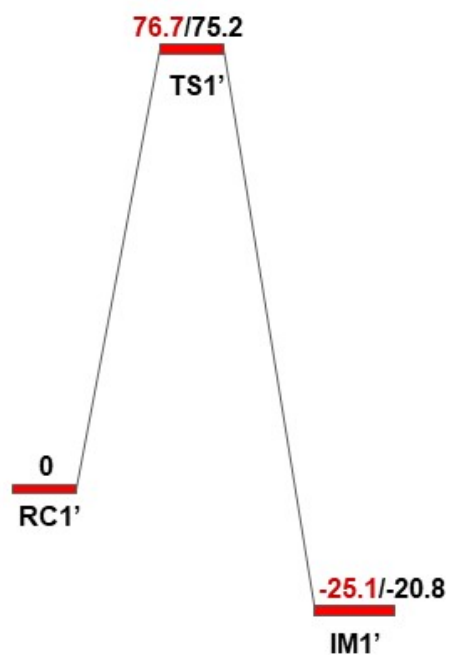

**Figure S17.** Energy profile for the dioxygen activation step in binding mode B.

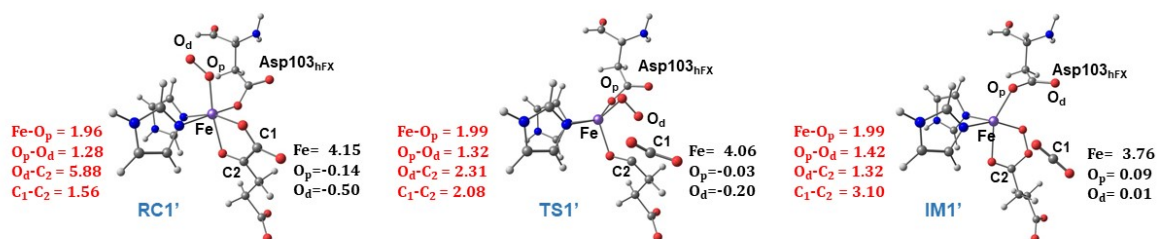

**Figure S18.** Optimized geometries for stationary points involved in dioxygen activation in the binding mode B.

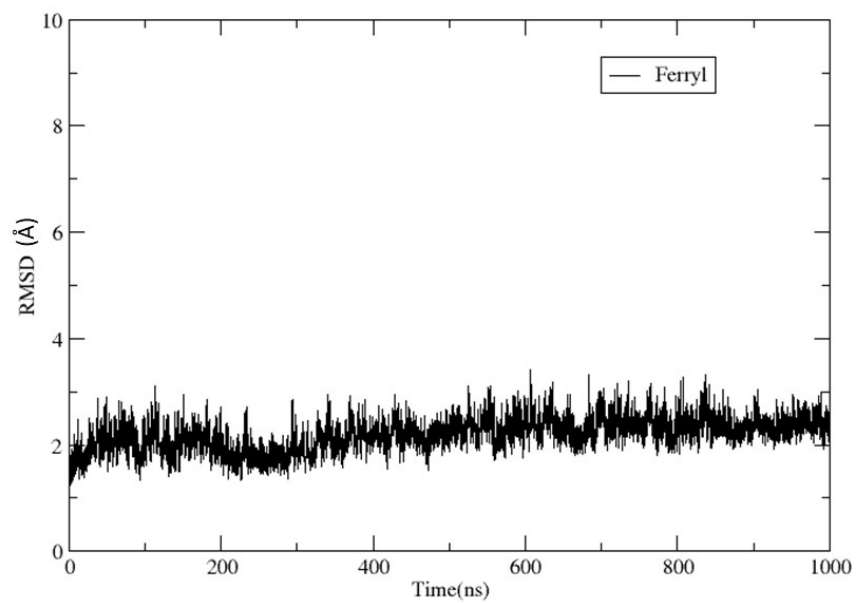

**Figure S19.** RMSD plot for the AspH WT ferryl complex obtained from 1 $\mu$ s MD simulation.

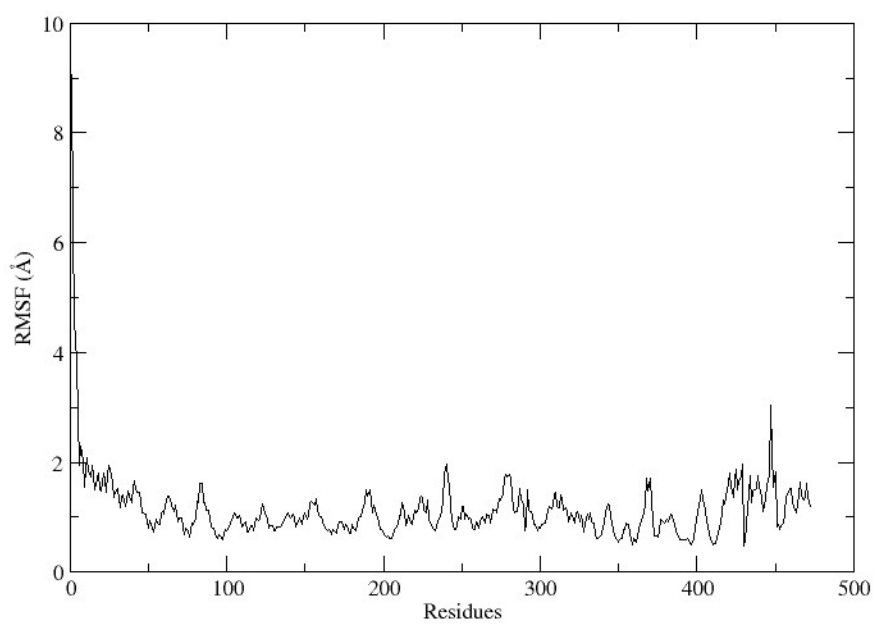

**Figure S20.** RMSF plot for the ferryl complex. Residues 1-429 are AspH protein residues; 430-Fe, 431-O<sub>p</sub>, 432-SC, 433-W1. Residues 434-472 are EGFD substrate residues; 451-Asp103<sub>hFX</sub>.

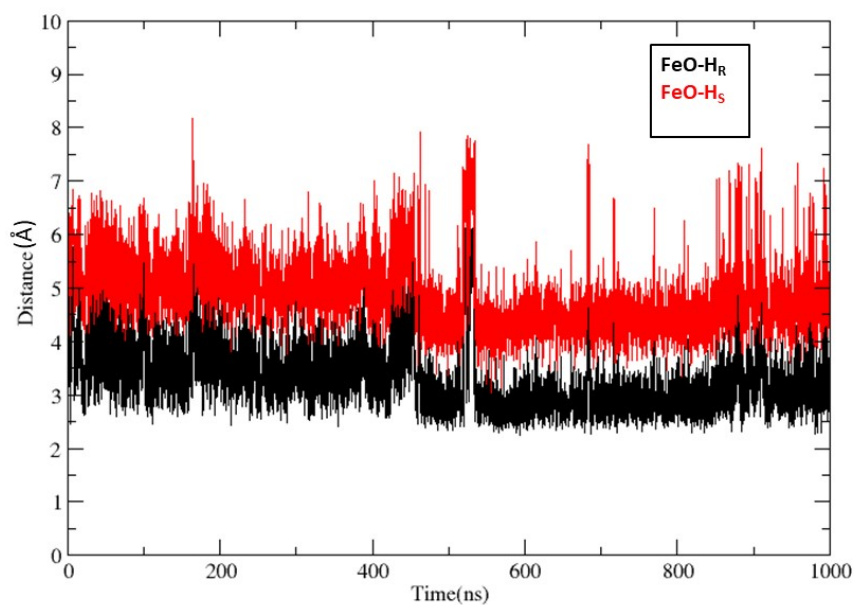

**Figure S21.** Plot of the distance between the ferryl  $O_p$  and the *pro*-chiral hydrogen atoms ( $H_R$  and  $H_S$ ) of C3 of Asp103<sub>hFX</sub> in the ferryl complex obtained from 1  $\mu$ s MD.

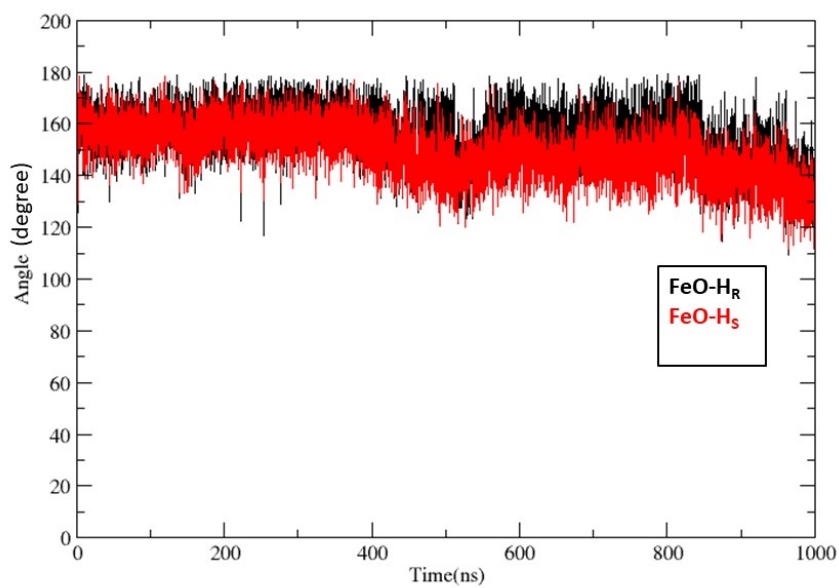

**Figure S22.** Plot of the Fe- $O_p$ -H angle for the *pro*-chiral hydrogen atoms ( $H_R$  and  $H_S$ ) of C3 of Asp103<sub>hFX</sub> in ferryl obtained from 1  $\mu$ s MD simulations.

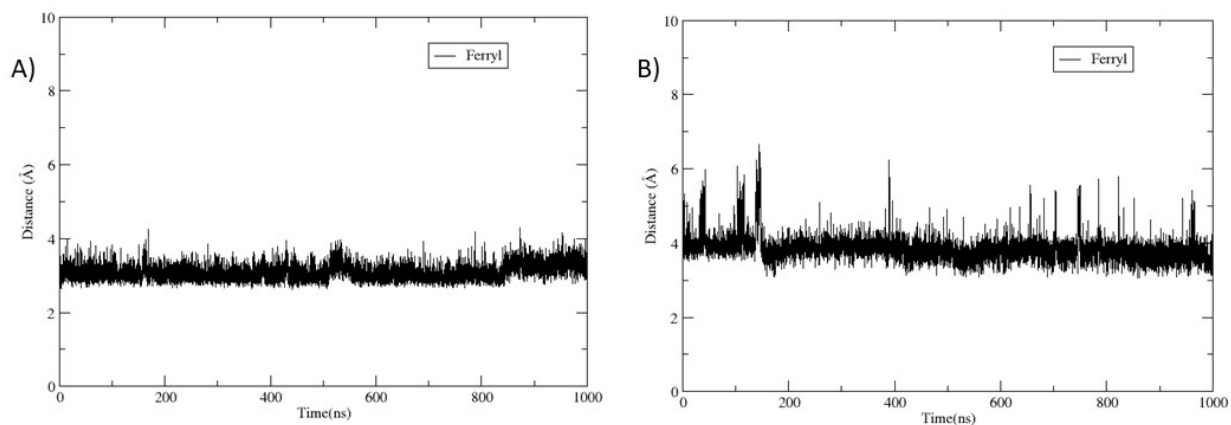

**Figure S23.** Plots for hydrogen bonds between: A) Arg688 guanidium NH and the Fe coordinated water (W1), B) the Ser668 side chain hydroxyl and succinate C4 carboxylate oxygen in the ferryl complex, obtained from 1 $\mu$ s MD simulation.

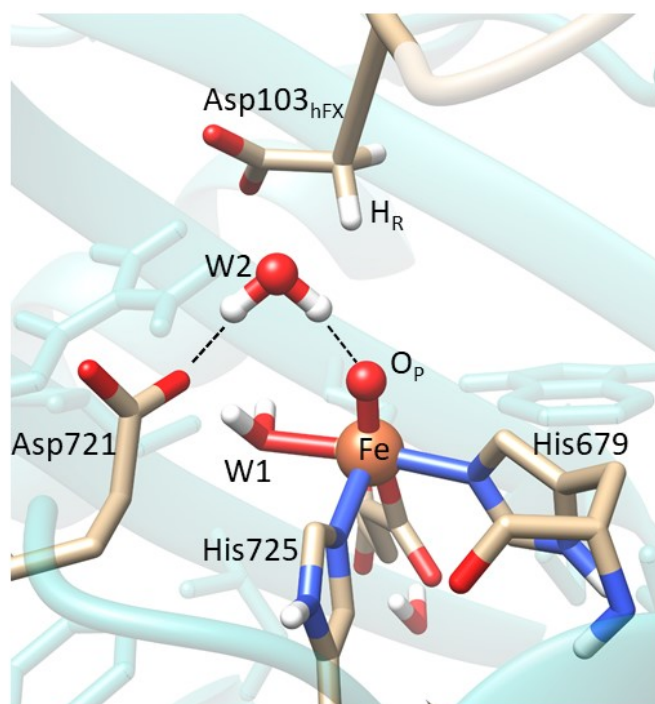

**Figure S24.** Solvent-mediated (W2) bridging hydrogen bonding interaction between SCS residue Asp721 and the Fe(IV)=O ( $O_p$ ).

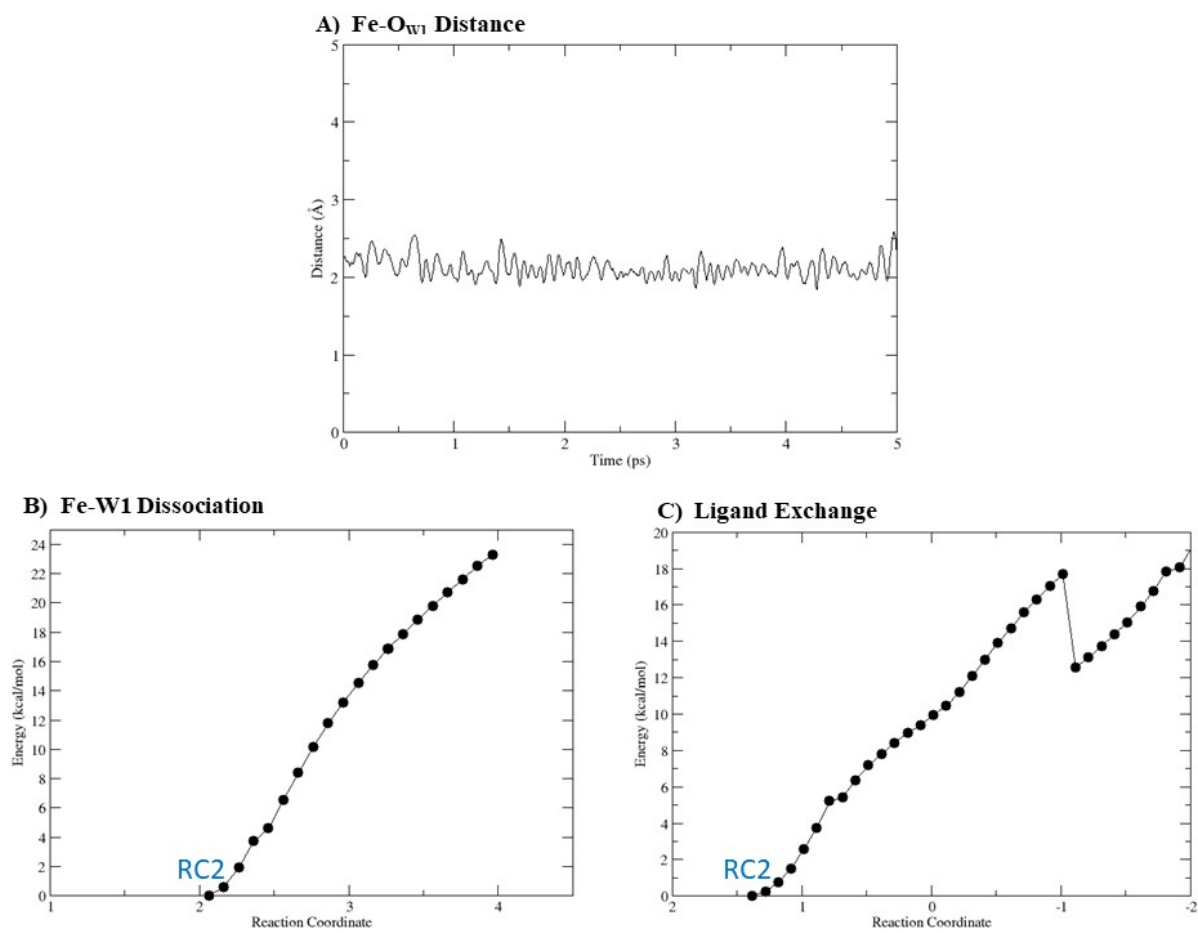

**Figure S25.** A) Plot for distance between Fe and O atom of W1 obtained from 5 ps QM/MM MD simulation. QM/MM energy scans for B) Fe-W1 bond dissociation. C) ligand exchange of W1 with other solvent water molecule (Ws). Reaction coordinate for B) is the distance between Fe and O<sub>W1</sub>. Reaction coordinate for C) is the difference between the Fe-O<sub>W1</sub> and Fe-O<sub>Ws</sub> distances ( $d1(\text{Fe-O}_{W1}) - d2(\text{Fe-O}_{Ws})$ ).

**Table S1.** Spin densities of stationary points involved in the HAT step.

|            |                    | <b>Fe</b> | <b>O<sub>p</sub></b> | <b>C<sub>B</sub></b> |
|------------|--------------------|-----------|----------------------|----------------------|
| Snapshot 1 | RC2                | 3.26      | 0.57                 | 0                    |
|            | TS <sub>ProR</sub> | 4.06      | 0.13                 | -0.34                |
|            | TS <sub>ProS</sub> | 4.05      | 0.07                 | -0.35                |
| Snapshot 2 | RC2                | 3.40      | 0.48                 | 0                    |
|            | TS <sub>ProR</sub> | 4.11      | 0.18                 | -0.31                |
|            | TS <sub>ProS</sub> | 4.07      | 0.14                 | -0.22                |
| Snapshot 3 | RC2                | 3.62      | 0.54                 | 0                    |
|            | TS <sub>ProR</sub> | 4.15      | 0.27                 | -0.29                |
|            | TS <sub>ProS</sub> | 4.13      | 0.30                 | -0.21                |
| Snapshot 4 | RC2                | 3.13      | 0.65                 | 0                    |
|            | TS <sub>ProR</sub> | 4.05      | 0.17                 | -0.37                |
|            | TS <sub>ProS</sub> | 4.04      | 0.06                 | -0.34                |
| Snapshot 5 | RC2                | 3.96      | 0.66                 | 0                    |
|            | TS <sub>ProR</sub> | 4.12      | 0.32                 | -0.31                |
|            | TS <sub>ProS</sub> | 4.13      | 0.23                 | -0.34                |

**Table S2.** Geometric features of stationary points involved in the HAT step.

| AspH WT    |                    | d(Fe-O <sub>P</sub> )<br>(Å) | d(O <sub>P</sub> -H)<br>(Å)                    | d(C <sub>B</sub> -H)<br>(Å)                    | <(Fe-O <sub>P</sub> -H)<br>(deg)                 | <(C <sub>B</sub> -H-O <sub>P</sub> )<br>(deg)    | $\varphi(\text{N-C}_A\text{-C}_B\text{-C}_G)$<br>(deg) |
|------------|--------------------|------------------------------|------------------------------------------------|------------------------------------------------|--------------------------------------------------|--------------------------------------------------|--------------------------------------------------------|
| Snapshot 1 | RC2                | 1.64                         | 3.18(H <sub>R</sub> )<br>4.81(H <sub>S</sub> ) | 1.11(H <sub>R</sub> )<br>1.10(H <sub>S</sub> ) | 121.2(H <sub>R</sub> )<br>114.4(H <sub>S</sub> ) | 169.3(H <sub>R</sub> )<br>55.03(H <sub>S</sub> ) | -76.09                                                 |
|            | TS <sub>proR</sub> | 1.77                         | 1.32                                           | 1.34                                           | 160.5                                            | 177.9                                            | -74.96                                                 |
|            | TS <sub>proS</sub> | 1.78                         | 1.34                                           | 1.33                                           | 165.4                                            | 152.9                                            | -27.10                                                 |
| Snapshot 2 | RC2                | 1.65                         | 2.80(H <sub>R</sub> )<br>4.40(H <sub>S</sub> ) | 1.10(H <sub>R</sub> )<br>1.10(H <sub>S</sub> ) | 129.4(H <sub>R</sub> )<br>124.5(H <sub>S</sub> ) | 170.6(H <sub>R</sub> )<br>56.3(H <sub>S</sub> )  | -74.18                                                 |
|            | TS <sub>proR</sub> | 1.79                         | 1.29                                           | 1.39                                           | 156.6                                            | 175.9                                            | -72.13                                                 |
|            | TS <sub>proS</sub> | 1.78                         | 1.41                                           | 1.31                                           | 159.7                                            | 152.7                                            | -16.55                                                 |
| Snapshot 3 | RC2                | 1.67                         | 3.01(H <sub>R</sub> )<br>4.51(H <sub>S</sub> ) | 1.10(H <sub>R</sub> )<br>1.10(H <sub>S</sub> ) | 136.2(H <sub>R</sub> )<br>128.8(H <sub>S</sub> ) | 172.9(H <sub>R</sub> )<br>61.5(H <sub>S</sub> )  | -74.51                                                 |
|            | TS <sub>proR</sub> | 1.79                         | 1.24                                           | 1.44                                           | 157.8                                            | 174.3                                            | -83.33                                                 |
|            | TS <sub>proS</sub> | 1.78                         | 1.32                                           | 1.40                                           | 159.6                                            | 162.8                                            | -23.19                                                 |
| Snapshot 4 | RC2                | 1.62                         | 3.27(H <sub>R</sub> )<br>4.89(H <sub>S</sub> ) | 1.10(H <sub>R</sub> )<br>1.10(H <sub>S</sub> ) | 117.3(H <sub>R</sub> )<br>110.9(H <sub>S</sub> ) | 170.0(H <sub>R</sub> )<br>55.9(H <sub>S</sub> )  | -72.89                                                 |
|            | TS <sub>proR</sub> | 1.76                         | 1.31                                           | 1.34                                           | 158.2                                            | 177.5                                            | -71.40                                                 |
|            | TS <sub>proS</sub> | 1.76                         | 1.34                                           | 1.31                                           | 160.4                                            | 153.3                                            | -21.97                                                 |
| Snapshot 5 | RC2                | 1.70                         | 2.64(H <sub>R</sub> )<br>4.14(H <sub>S</sub> ) | 1.11(H <sub>R</sub> )<br>1.10(H <sub>S</sub> ) | 164.1(H <sub>R</sub> )<br>149.9(H <sub>S</sub> ) | 174.0(H <sub>R</sub> )<br>61.8(H <sub>S</sub> )  | -76.77                                                 |
|            | TS <sub>proR</sub> | 1.78                         | 1.26                                           | 1.47                                           | 171.9                                            | 172.6                                            | -74.73                                                 |
|            | TS <sub>proS</sub> | 1.79                         | 1.28                                           | 1.42                                           | 166.6                                            | 161.1                                            | -29.71                                                 |



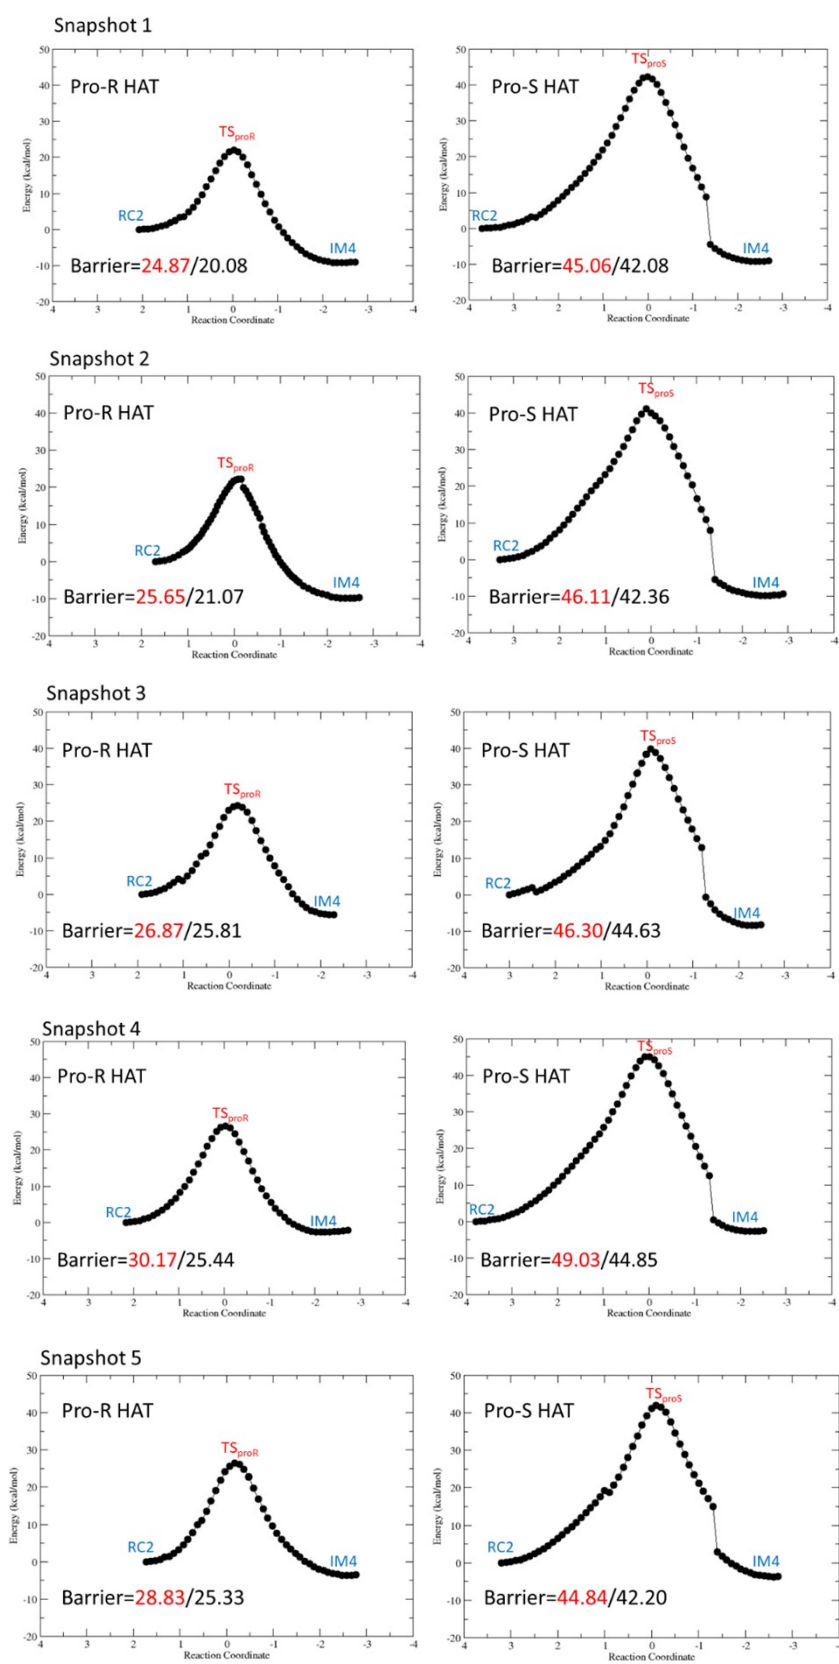

**Figure S26.** QM/MM energy scans (snapshots 1-5) *pro-R/S* HAT step, calculated at the UB3LYP/def2-SVP level. Energy barriers calculated at B2 (red) and B3 (black) levels are provided. Reaction coordinate is defined as the difference between the  $O_p-H_{R/S}$  and  $C_B-H_{R/S}$  distances ( $d_1(O_p-H_{R/S}) - d_2(C_B-H_{R/S})$ ).

**Table S3.** Computed energy barriers with dispersion corrections (D3-BJ) for representative snapshots in the *pro-(R)* HAT step.

|            | B2<br>(kcal/mol) | B3<br>(kcal/mol) |
|------------|------------------|------------------|
| Snapshot 1 | 23.1             | 19.4             |
| Snapshot 4 | 28.8             | 23.4             |

**Table S4.** Relationships between W2-Asp721-W1 hydrogen bond distances and the HAT barrier.

| AspH WT    | $d(\text{H}_{\text{W2}}\dots\text{O}_{\text{p}})$<br>(Å) | $\angle(\text{O}_{\text{w2}}-\text{H}_{\text{W2}}-\text{O}_{\text{p}})$<br>(deg) | $d(\text{H}_{\text{W1}}\dots\text{O}_{\text{Asp}})$<br>(Å) | $\angle(\text{O}_{\text{w1}}-\text{H}_{\text{W1}}-\text{O}_{\text{Asp}})$<br>(deg) | $\Delta E_{\text{HAT}}$<br><br>B2/B3<br>(kcal/mol) |
|------------|----------------------------------------------------------|----------------------------------------------------------------------------------|------------------------------------------------------------|------------------------------------------------------------------------------------|----------------------------------------------------|
| Snapshot 1 | 1.59                                                     | 177.0                                                                            | 1.51                                                       | 176.9                                                                              | 24.9/20.8                                          |
| Snapshot 2 | 1.64                                                     | 175.2                                                                            | 1.49                                                       | 175.7                                                                              | 25.7/21.1                                          |
| Snapshot 3 | 1.70                                                     | 163.7                                                                            | 1.40                                                       | 173.1                                                                              | 26.9/25.8                                          |
| Snapshot 4 | 1.70                                                     | 160.3                                                                            | 1.37                                                       | 175.9                                                                              | 30.2/25.4                                          |
| Snapshot 5 | 1.77                                                     | 157.83                                                                           | 1.36                                                       | 175.3                                                                              | 28.8/27.3                                          |

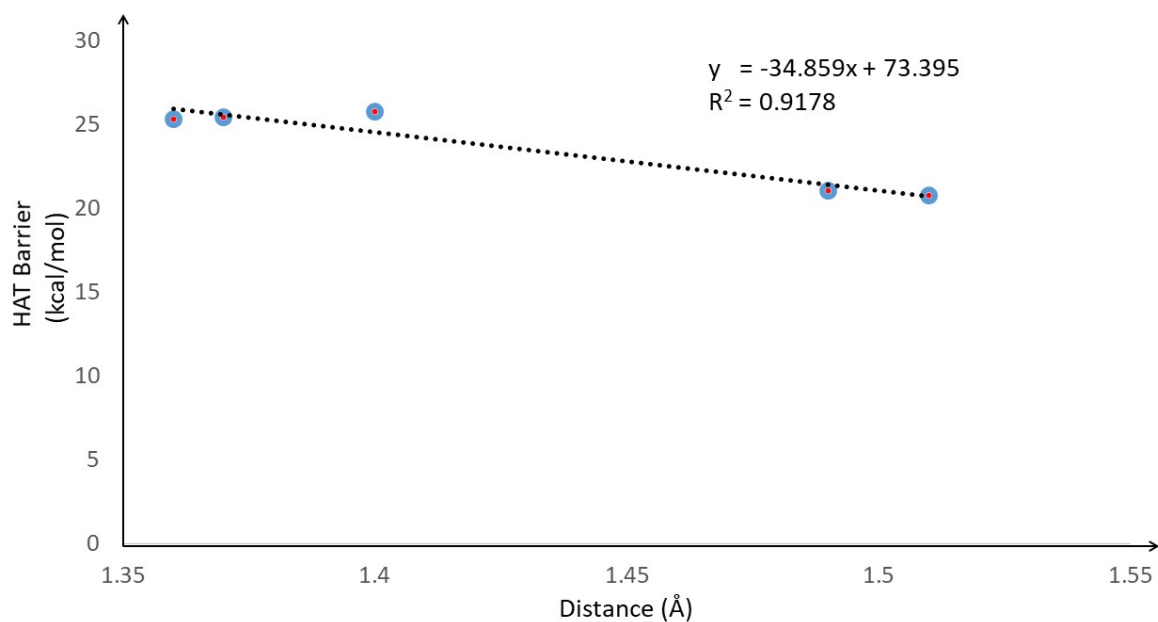

**Figure S27.** Correlation plot for the *pro-(R)* HAT barrier versus the W1-Asp721 hydrogen bond distance.

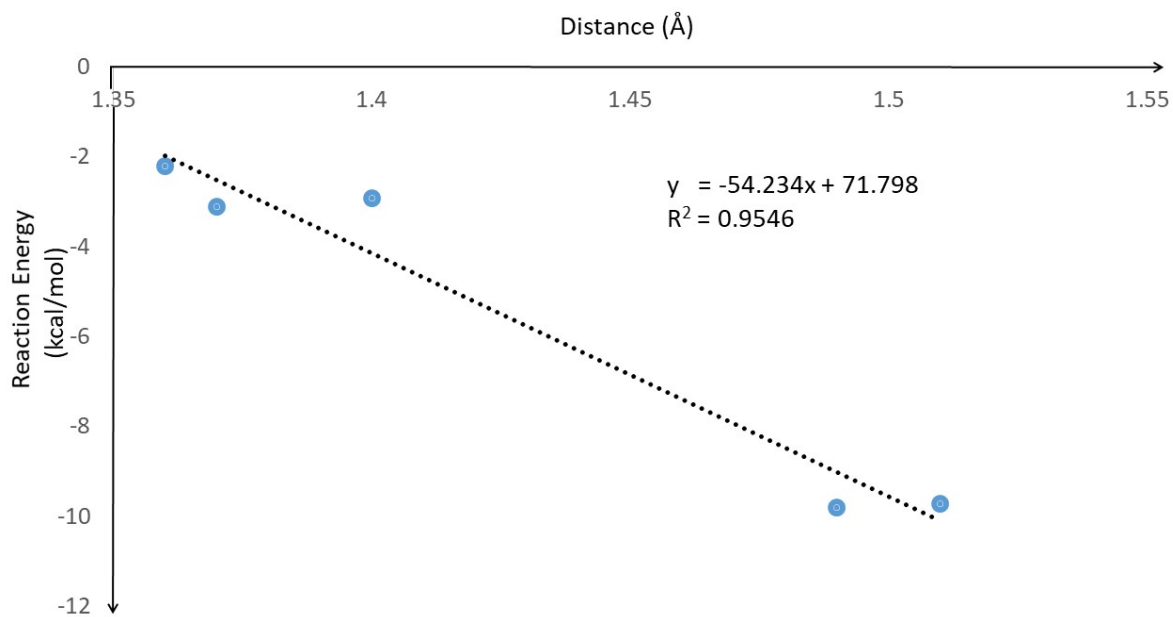

**Figure S28.** Correlation plot for the *pro-(R)* HAT reaction energy versus the W1-Asp721 hydrogen bond distance.

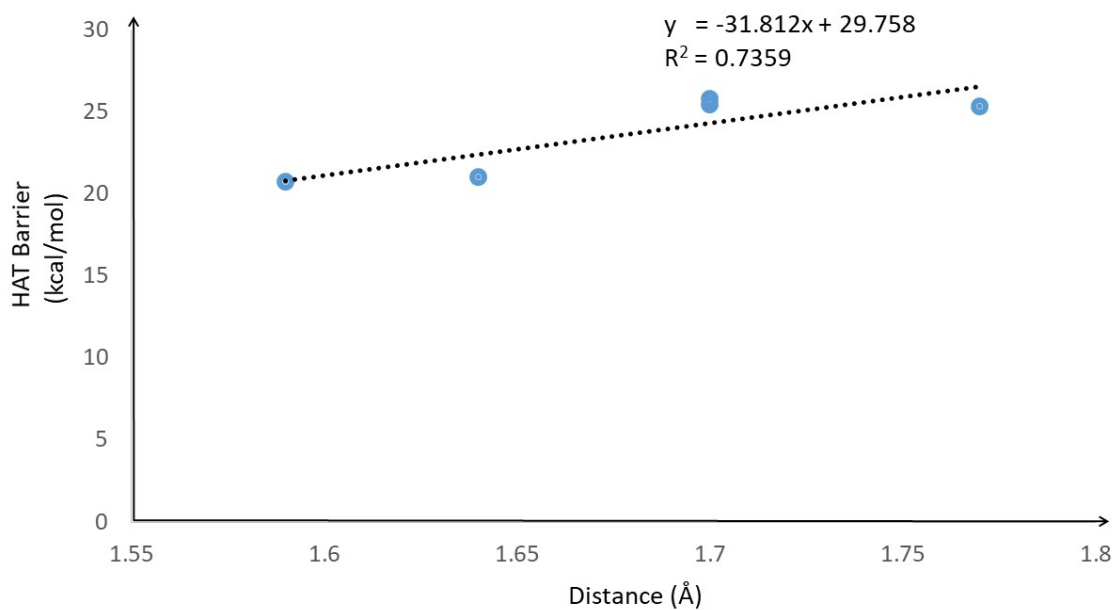

**Figure S29.** Correlation plot for the *pro-(R)* HAT barrier versus the W2-Asp721 hydrogen bond distance.

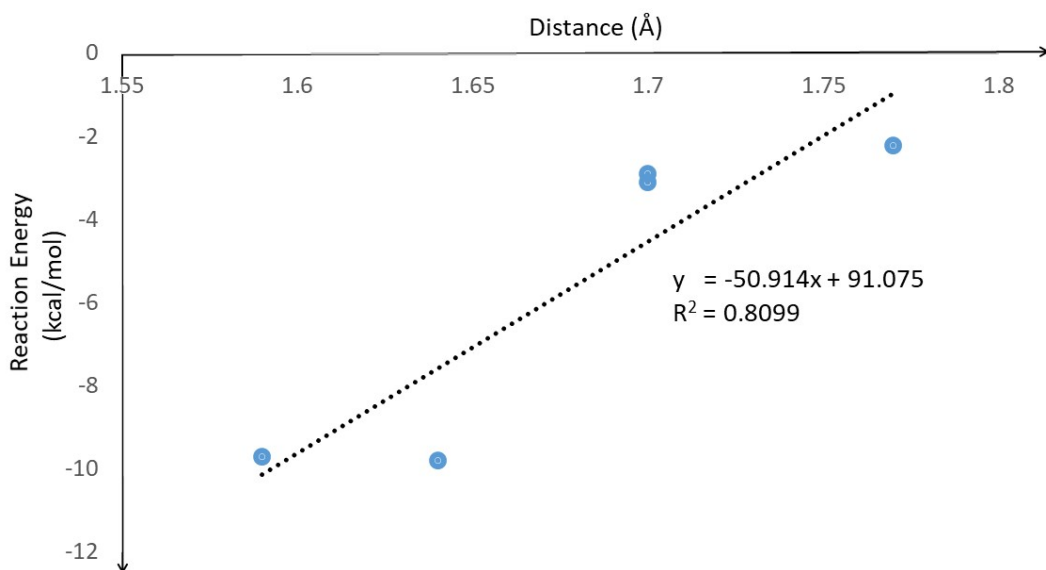

**Figure S30.** Correlation plot for the *pro-(R)* HAT reaction energy versus the W2-Asp721 hydrogen bond distance.

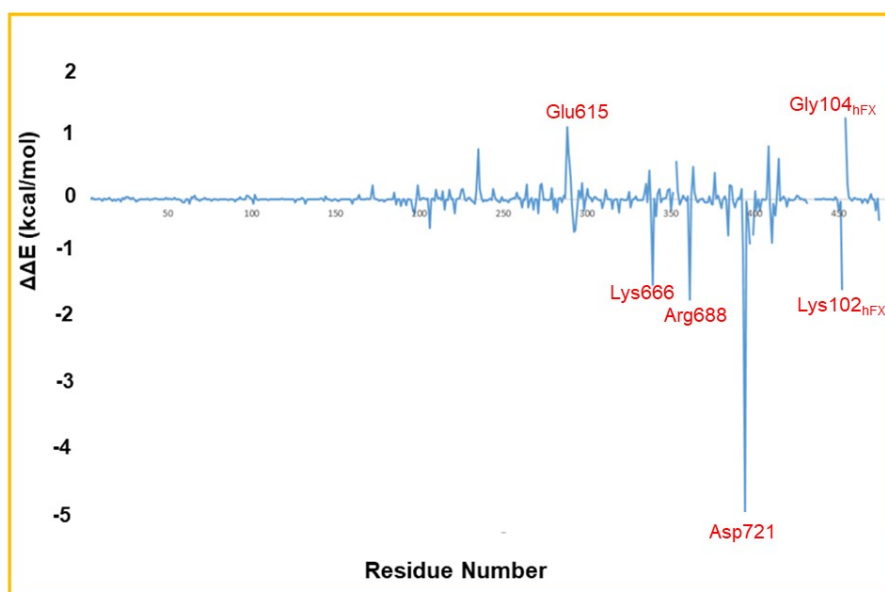

**Figure S31.** Energy Decomposition Analysis of the HAT step based on Snapshot 1. Residues stabilizing/destabilizing IM4 over RC2 are marked in red.

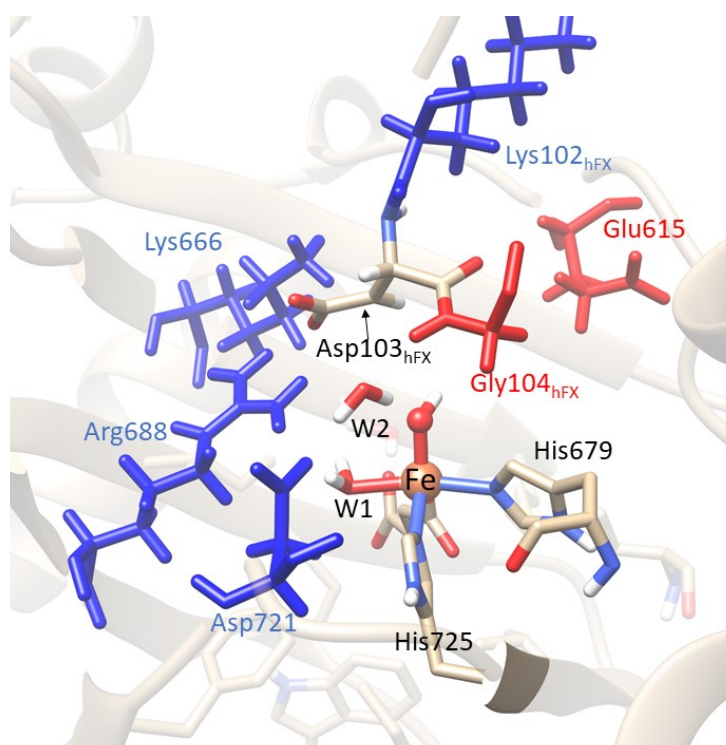

**Figure S32.** SCS residues stabilizing (blue) and destabilizing (red) the IM4 relative to RC2.

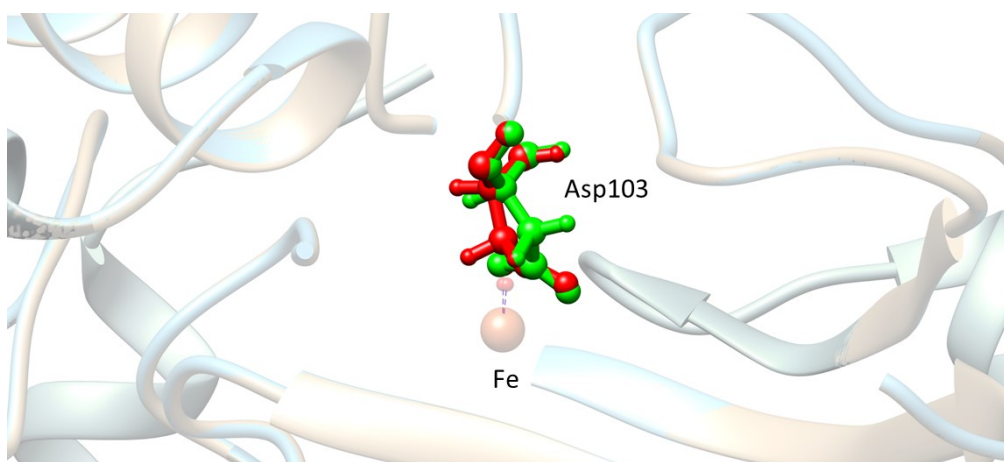

**Figure S33.** Superimposed structures of Fe center and Asp103<sub>hFX</sub> in TS<sub>proR</sub> (green) and TS<sub>proS</sub> (red)

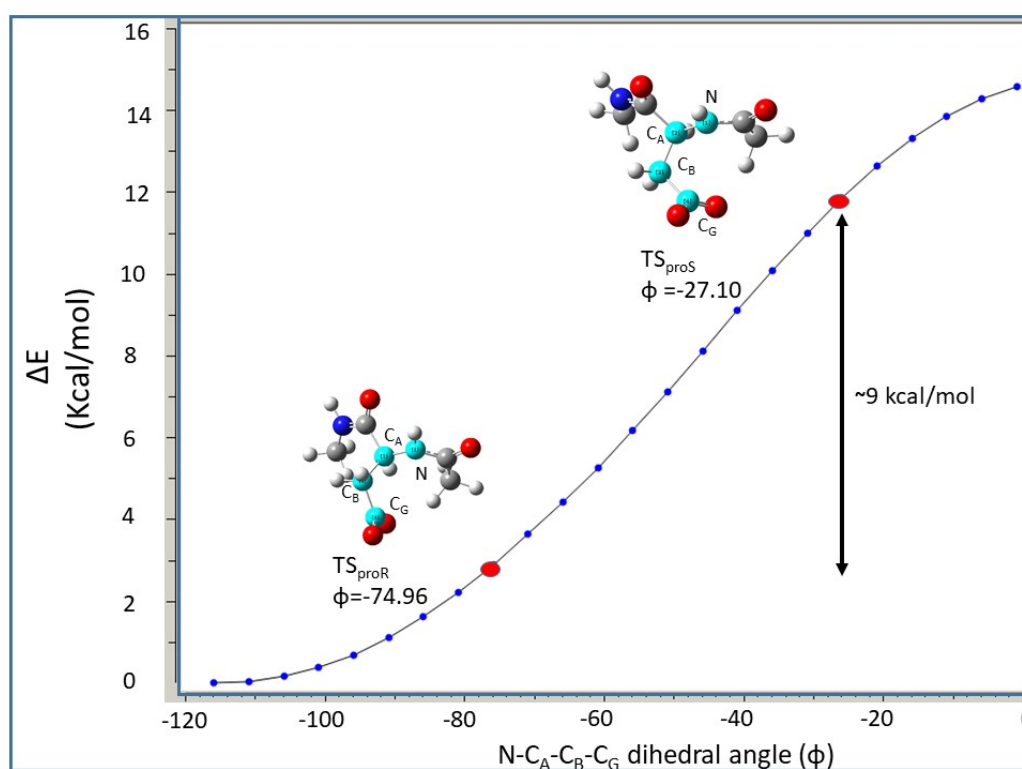

**Figure S34.** QM energy scan varying the N-C<sub>A</sub>-C<sub>B</sub>-C<sub>G</sub> dihedral angle, at the DFT/UB3LYP/def2-SVP level. Stationary points corresponding to TS<sub>proR</sub> and TS<sub>proS</sub> dihedral angles from snapshot 1 are marked in red.

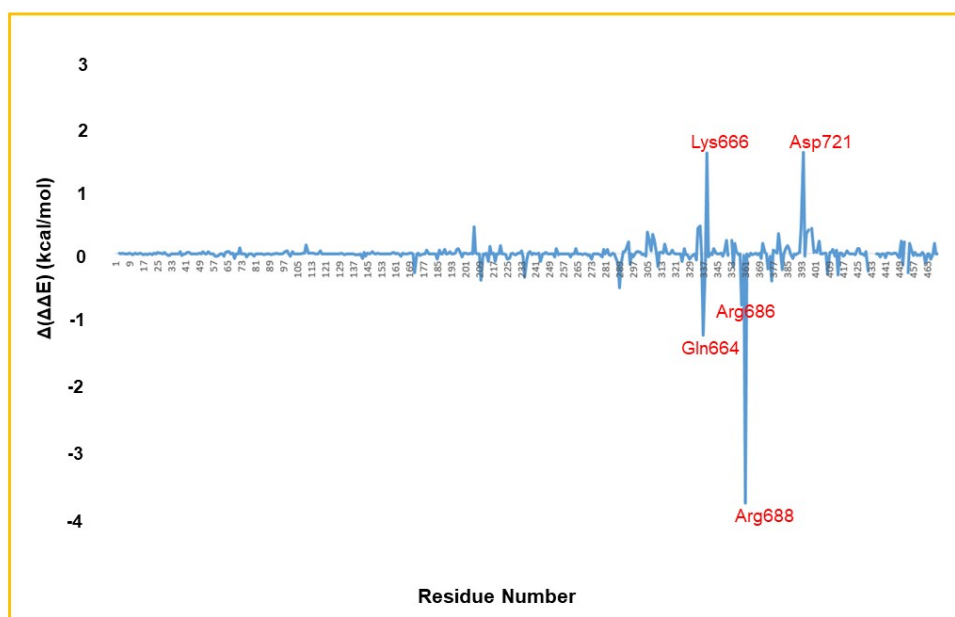

**Figure S35.** Energy Decomposition Analysis of HAT step. Residues stabilizing/destabilizing  $TS_{\text{proR}}$  over  $TS_{\text{proS}}$  are marked in red.

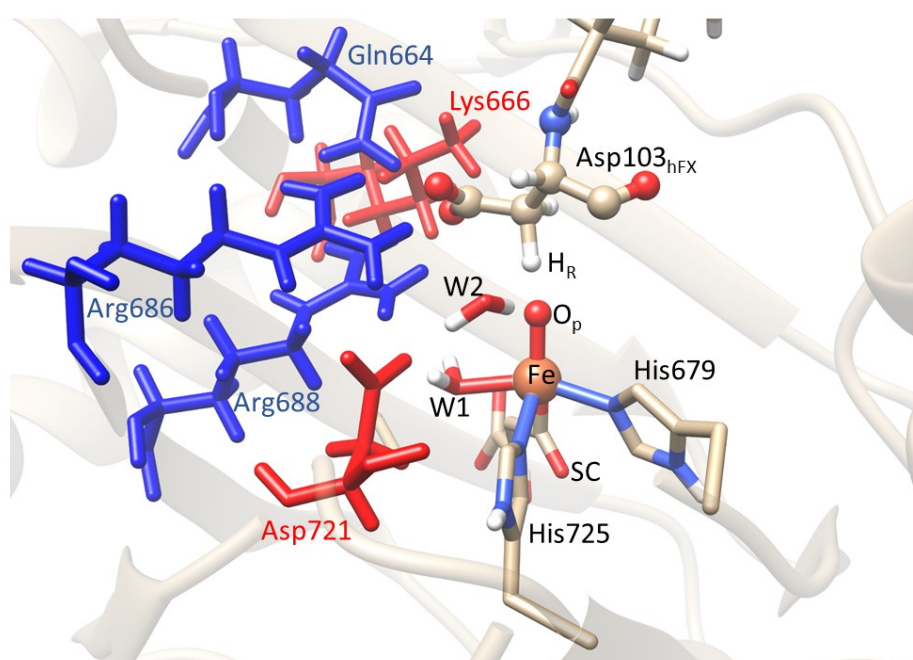

**Figure S36.** Second sphere residues contributing to stereoselectivity, as obtained from Energy Decomposition Analysis (EDA). Residues in blue stabilize, while residues in red destabilize  $TS_{\text{proR}}$  over  $TS_{\text{proS}}$ . SC-succinate

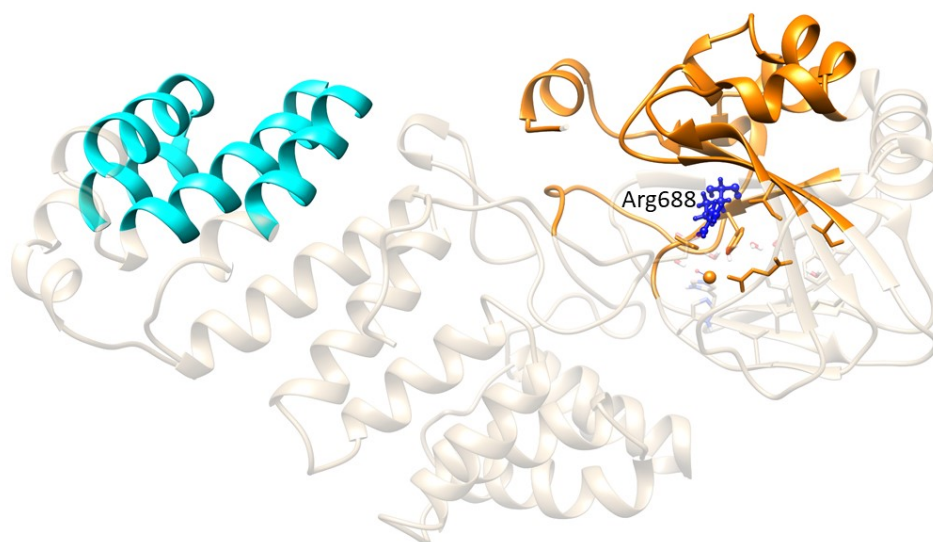

**Figure S37.** Residues showing positive (orange) and negative (cyan) correlated motion with Arg688 (blue).

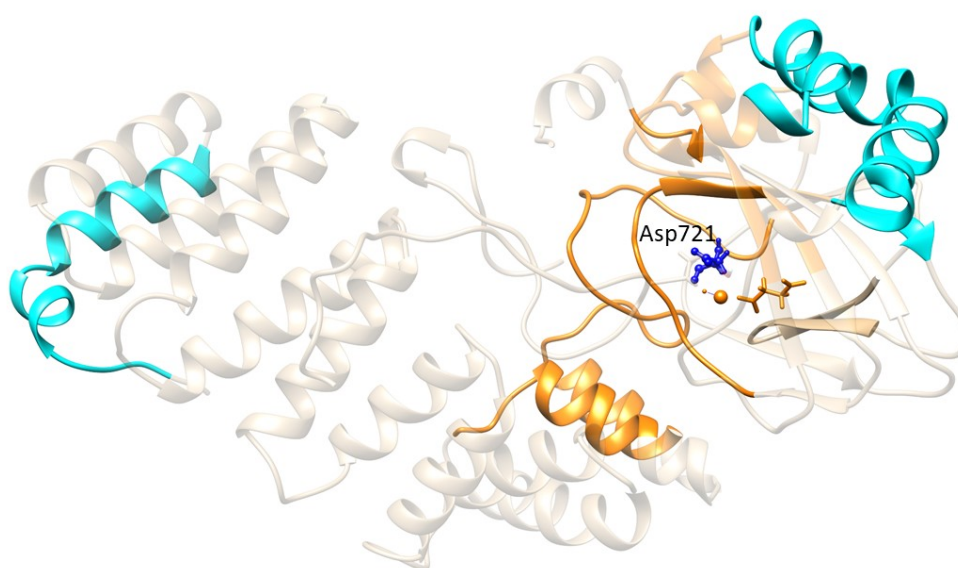

**Figure S38.** Residues showing positive (orange) and negative (cyan) correlated motion with Asp721 (blue).



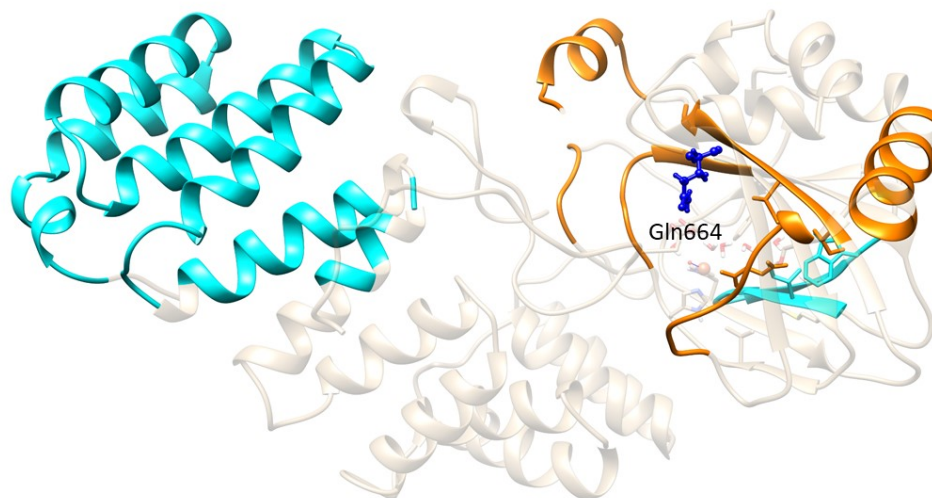

**Figure S39.** Residues showing positive (orange) and negative (cyan) correlated motions with Gln664 (blue).

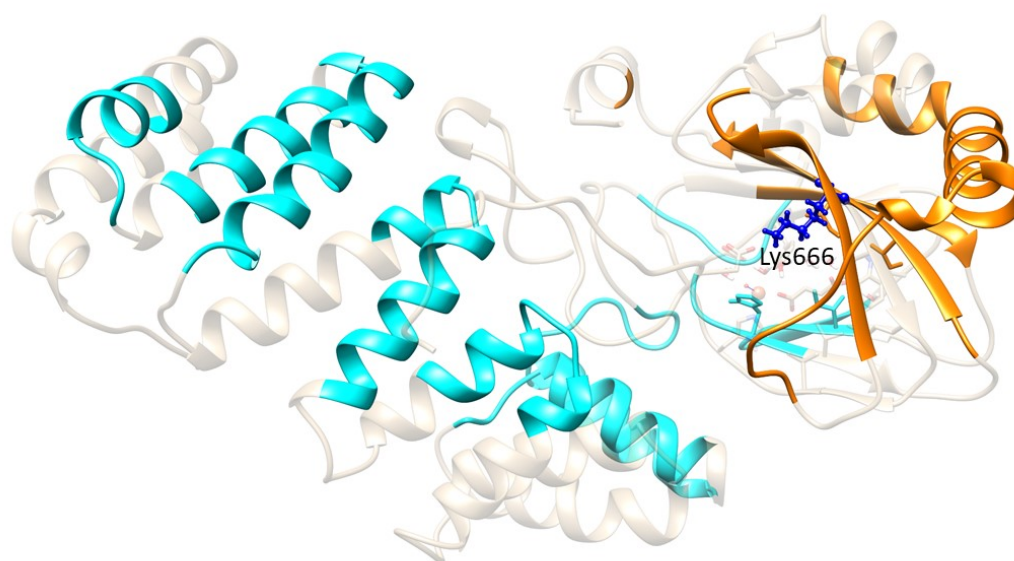

**Figure S40.** Residues showing positive (orange) and negative (cyan) correlated motion with Lys666 (blue).

**Table S5.** Internal Electric Field (IEF) (in atomic units) calculated along the Fe=O direction for *pro-R/S* HAT steps.

| AspH Ferryl | RC2     | TS <sub>proR</sub> | TS <sub>proS</sub> | $\Delta$ EF<br>(TS <sub>proR</sub> - RC2) | $\Delta$ EF<br>(TS <sub>proS</sub> - RC2) |
|-------------|---------|--------------------|--------------------|-------------------------------------------|-------------------------------------------|
| Snapshot 1  | -0.0038 | -0.0211            | -0.0229            | -0.0173                                   | -0.0191                                   |
| Snapshot 2  | -0.0143 | -0.0298            | -0.0305            | -0.0155                                   | -0.0162                                   |
| Snapshot 3  | -0.0146 | -0.0301            | -0.0340            | -0.0155                                   | -0.0194                                   |
| Snapshot 4  | 0.0005  | -0.0214            | -0.0245            | -0.0219                                   | -0.0250                                   |
| Snapshot 5  | -0.0308 | -0.0351            | -0.0371            | -0.0043                                   | -0.0063                                   |

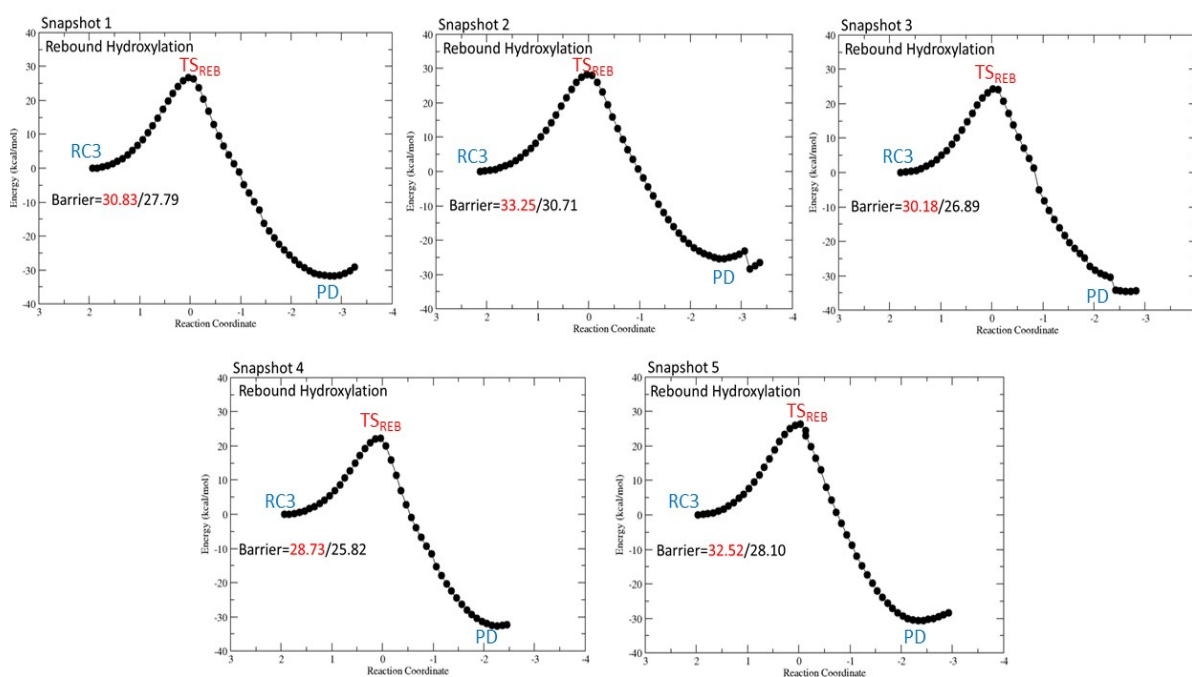

**Figure S41.** QM/MM energy scans (snapshots 1-5) for the rebound hydroxylation step, calculated at the UB3LYP/def2-SVP level. Energy barriers calculated at B2 (red) and B3 (black) are provided. Reaction coordinate is defined as the difference between the O<sub>p</sub>-C<sub>B</sub> and Fe-O<sub>p</sub> distances ( $d1(O_p-C_B) - d2(Fe-O_p)$ ).

**Table S6.** Computed energy barriers with dispersion corrections (D3-BJ) for representative snapshots in the rebound hydroxylation step.

|            | B2<br>(kcal/mol) | B3<br>(kcal/mol) |
|------------|------------------|------------------|
| Snapshot 1 | 28.5             | 25.5             |
| Snapshot 4 | 26.4             | 23.4             |

**Table S7.** Spin densities of stationary points involved in the rebound hydroxylation step.

|            |                   | Fe   | O <sub>p</sub> | C <sub>B</sub> |
|------------|-------------------|------|----------------|----------------|
| Snapshot 1 | RC3/IM4           | 4.27 | 0.27           | -0.90          |
|            | TS <sub>REB</sub> | 4.06 | 0.19           | -0.57          |
|            | PD                | 3.82 | 0              | 0              |
| Snapshot 2 | RC3/IM4           | 4.24 | 0.28           | -0.88          |
|            | TS <sub>REB</sub> | 4.03 | 0.18           | -0.50          |
|            | PD                | 3.78 | 0              | 0              |
| Snapshot 3 | RC3/IM4           | 4.23 | 0.23           | -0.88          |
|            | TS <sub>REB</sub> | 3.96 | 0.11           | -0.47          |
|            | PD                | 3.79 | 0              | 0              |
| Snapshot 4 | RC3/IM4           | 4.23 | 0.29           | -0.89          |
|            | TS <sub>REB</sub> | 4.07 | 0.18           | -0.54          |
|            | PD                | 3.81 | 0              | 0              |
| Snapshot 5 | RC3/IM4           | 4.22 | 0.25           | -0.89          |
|            | TS <sub>REB</sub> | 3.98 | 0.14           | -0.46          |
|            | PD                | 3.81 | 0              | 0              |

**Table S8.** Geometric parameters for stationary points involved in the rebound hydroxylation step.

| AspH WT    |                   | $d(\text{Fe-O}_P)$<br>(Å) | $d(\text{O}_P\text{-C}_B)$<br>(Å) | $\angle(\text{Fe-O}_P\text{-C})$<br>(deg) | $\varphi(\text{N-C}_A\text{-C}_B\text{-C}_G)$<br>(deg) |
|------------|-------------------|---------------------------|-----------------------------------|-------------------------------------------|--------------------------------------------------------|
| Snapshot 1 | RC3/IM4           | 1.85                      | 3.78                              | 151.5                                     | -87.70                                                 |
|            | TS <sub>REB</sub> | 2.20                      | 2.23                              | 165.5                                     | -79.55                                                 |
|            | PD                | 4.21                      | 1.44                              | -                                         | -76.05                                                 |
| Snapshot 2 | RC3/IM4           | 1.84                      | 3.97                              | 130.3                                     | -90.60                                                 |
|            | TS <sub>REB</sub> | 2.17                      | 2.17                              | 160.9                                     | -74.54                                                 |
|            | PD                | 4.01                      | 1.44                              | -                                         | -68.46                                                 |
| Snapshot 3 | RC3/IM4           | 1.87                      | 3.65                              | 171.1                                     | -110.13                                                |
|            | TS <sub>REB</sub> | 2.34                      | 2.19                              | 175.0                                     | -88.93                                                 |
|            | PD                | 4.10                      | 1.42                              | -                                         | -80.80                                                 |
| Snapshot 4 | RC3/IM4           | 1.83                      | 3.77                              | 151.5                                     | -86.08                                                 |
|            | TS <sub>REB</sub> | 2.11                      | 2.18                              | 173.1                                     | -76.35                                                 |
|            | PD                | 3.70                      | 1.43                              | -                                         | -63.00                                                 |
| Snapshot 5 | RC3/IM4           | 1.87                      | 3.83                              | 167.6                                     | -88.51                                                 |
|            | TS <sub>REB</sub> | 2.30                      | 2.27                              | 174.1                                     | -82.26                                                 |
|            | PD                | 3.82                      | 1.45                              | -                                         | -74.01                                                 |

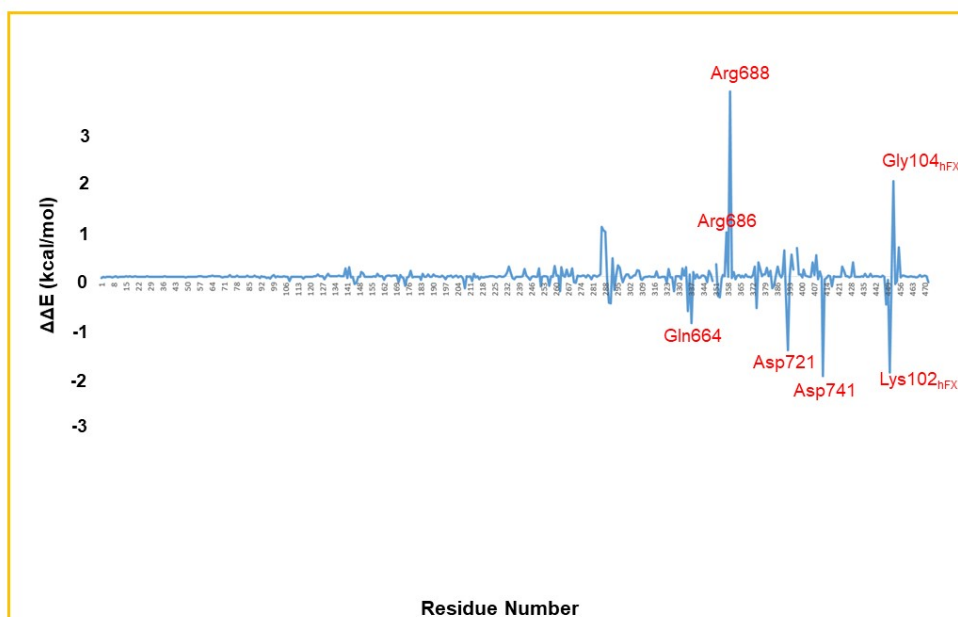

**Figure S42.** Energy Decomposition Analysis of the rebound step based on Snapshot 1. Residues stabilizing/destabilizing  $TS_{REB}$  are marked in red.

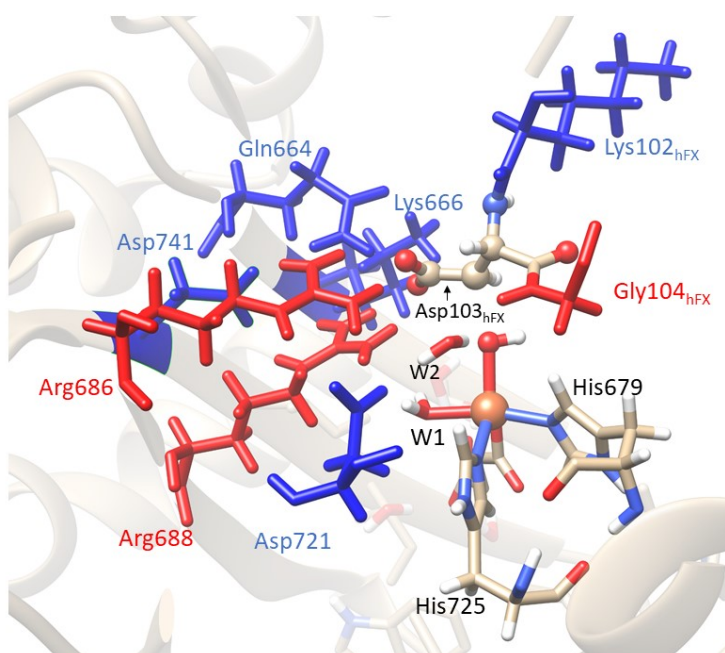

**Figure S43.** Second sphere residues involved in rebound hydroxylation, obtained from Energy Decomposition Analysis (EDA). Residues in blue stabilize, while residues in red destabilizes  $TS_{REB}$ .

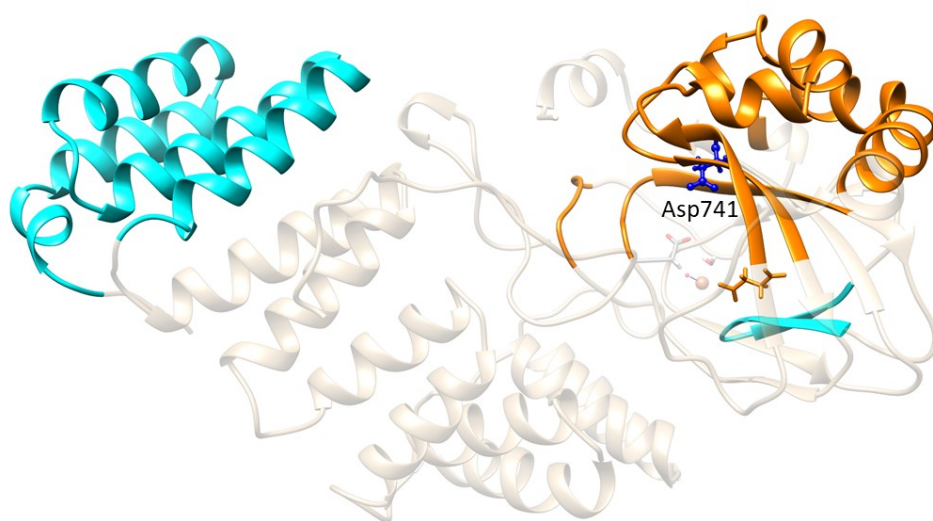

**Figure S44.** Residues showing negative (cyan) and positive correlated motions (orange) with Asp741 (yellow).

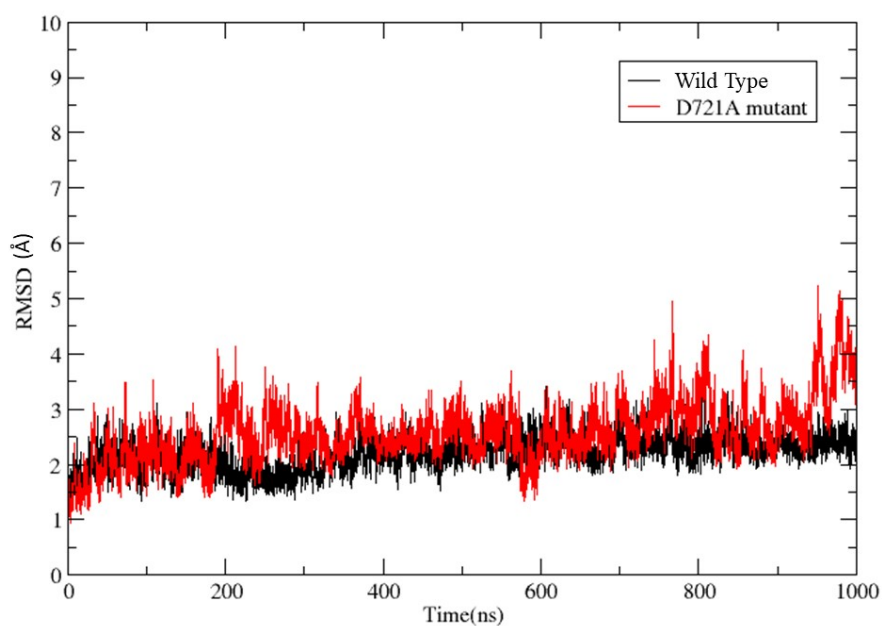

**Figure S45.** RMSD plot for AspH WT and the D721A mutant Fe(IV)=O complexes obtained from 1 $\mu$ s MD.

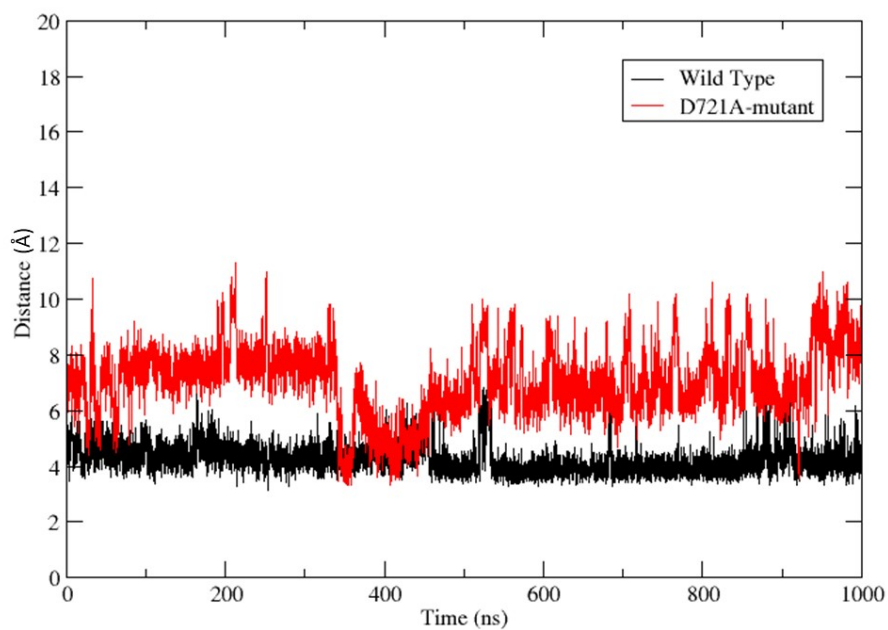

**Figure S46.** O<sub>p</sub>-C<sub>B</sub> distance plot for AspH WT and the D721A mutant Fe(IV)=O complexes obtained from 1μs MD.

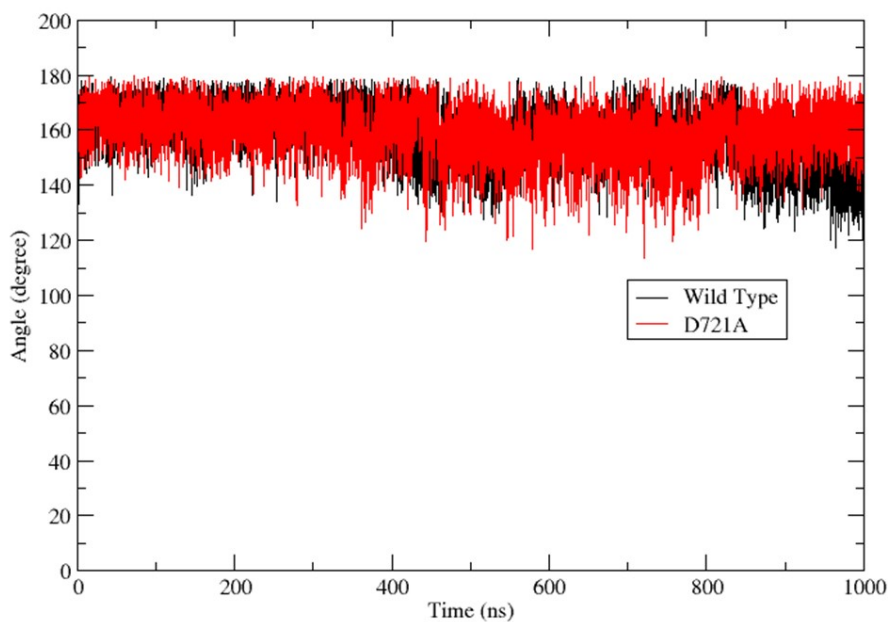

**Figure S47.** Fe-O<sub>p</sub>-C<sub>B</sub> angle plot for AspH WT and the D721A mutant Fe(IV)=O complexes obtained from 1μs MD.

**Table S9.** Key geometric parameters of the Fe(IV)=O intermediate for AspH WT and the D721A mutant, from 1 $\mu$ s MD simulations.

| AspH - Ferryl | Average-RMSD<br>(Å) | Average<br>d(O <sub>p</sub> -H <sub>R</sub> )<br>(Å) | Average<br><(Fe-O <sub>p</sub> -H <sub>R</sub> )<br>(Å) | Average<br>d(O <sub>p</sub> -C <sub>B</sub> )<br>(Å) | Average<br><(Fe-O <sub>p</sub> -C <sub>B</sub> )<br>(Å) |
|---------------|---------------------|------------------------------------------------------|---------------------------------------------------------|------------------------------------------------------|---------------------------------------------------------|
| Wild type     | 2.53                | 3.34                                                 | 154.6                                                   | 4.25                                                 | 157.7                                                   |
| D721A         | 2.31                | 6.43                                                 | 157.3                                                   | 7.03                                                 | 159.2                                                   |

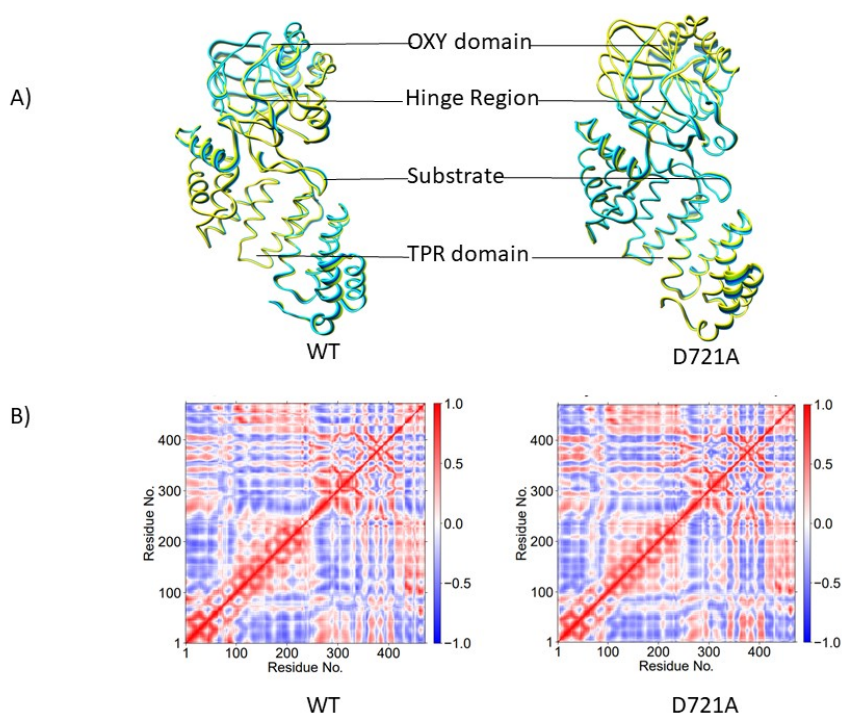

**Figure S48.** A) PCA and B) DCCA plots for AspH WT and the D721A mutant ferryl complexes. Residues 1-429 are AspH protein residues; 430-Fe, 431-O<sub>p</sub>, 432- succinate, 433-W1, and 434-472 are EGFD substrate residues; 451-Asp103<sub>hFX</sub>. The motion of the residues in PCA (part A) is indicated by the color change from yellow to blue.



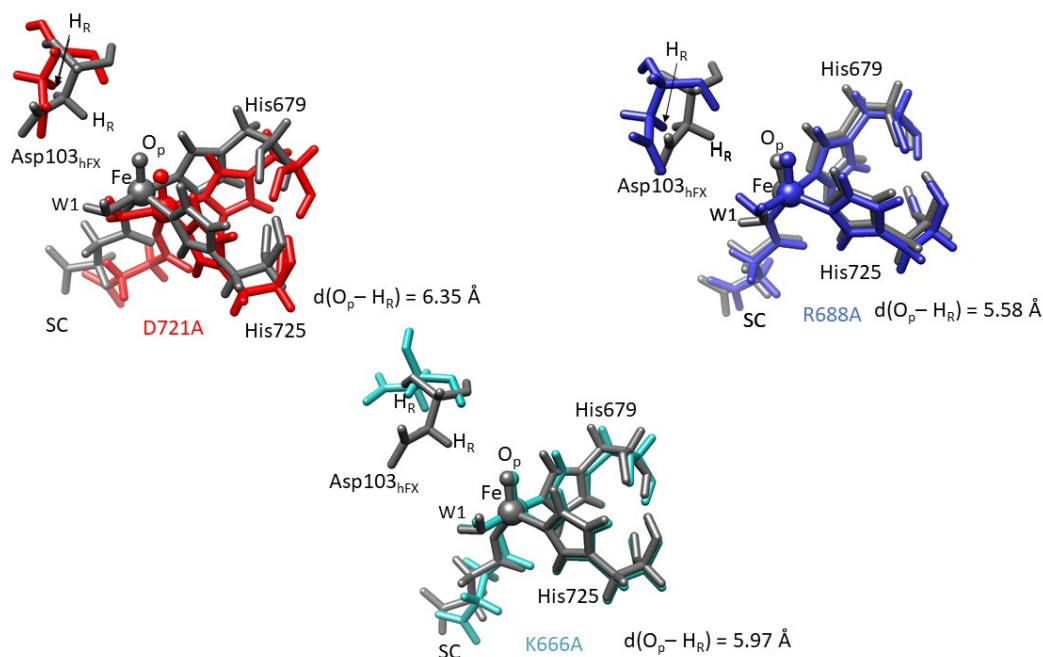

**Figure S49.** QM/MM optimized structures of AspH WT (black), D721A (red), R688A (blue), K666A (cyan) mutants superimposed, showing Fe(IV)=O and hFX substrate positioning in the ferryl complex. SC-succinate.

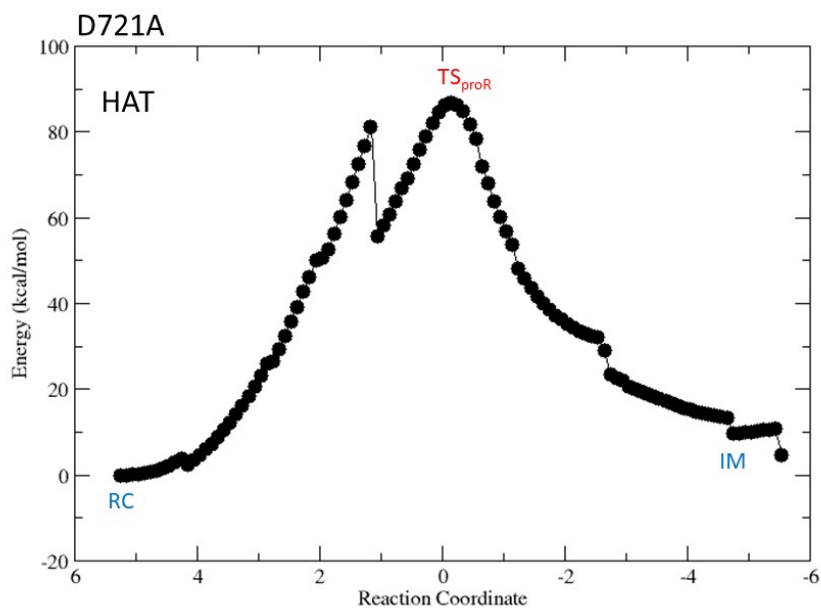

**Figure S50.** QM/MM energy scan for the HAT step for the D721A mutant calculated at the UB3LYP/def2-SVP level. Reaction coordinate is defined as the difference between the  $O_p-H_R$  and  $C_B-H_R$  distances ( $d1(O_p-H_R) - d2(C_B-H_R)$ ).

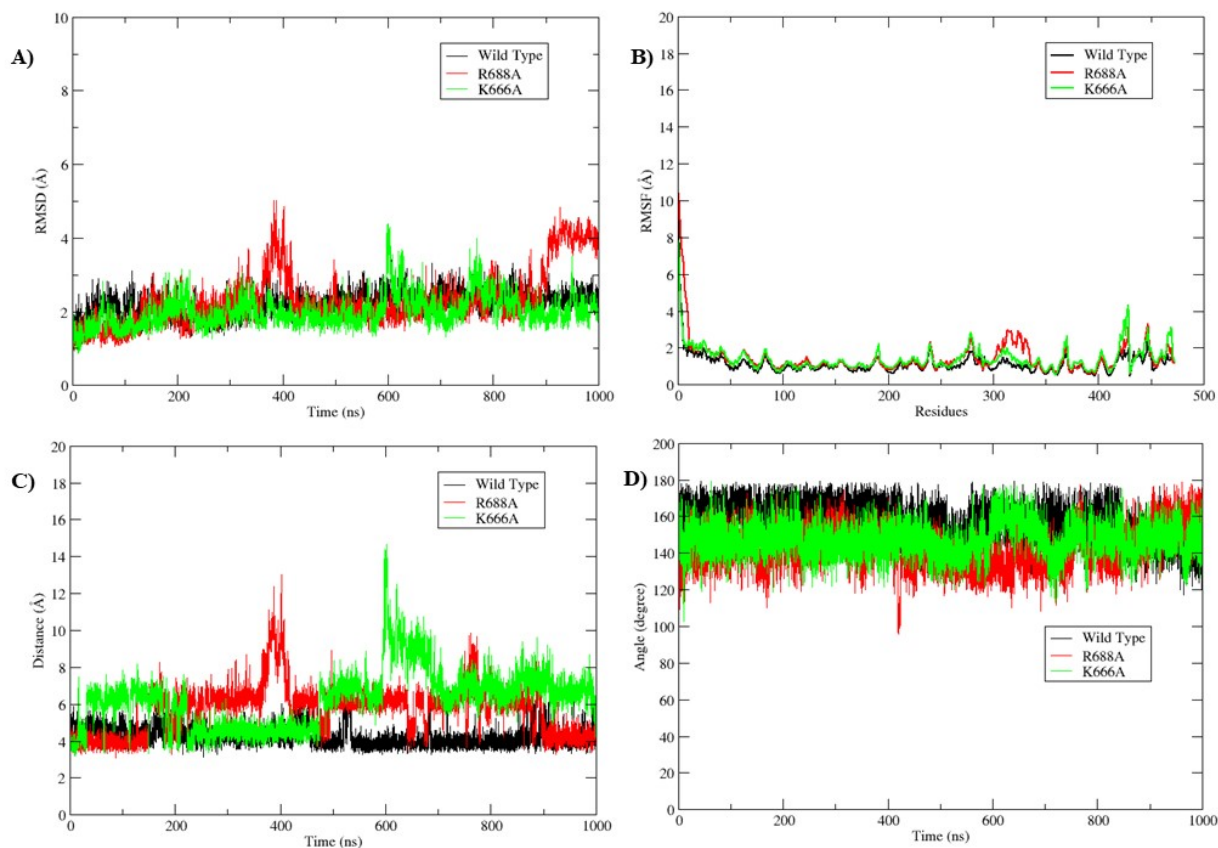

**Figure S51.** A) RMSD. B) RMSF. C)  $O_p-C_B$  Distance. D)  $Fe-O_p-C_B$  angle plots for AspH WT and mutants - R688A, K666A from 1  $\mu$ s MD simulation.

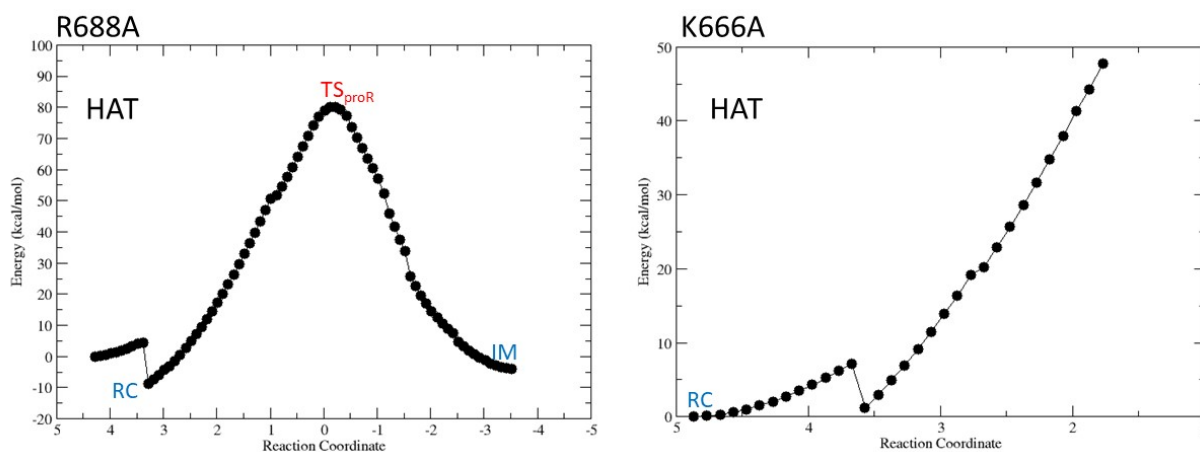

**Figure S52.** QM/MM energy scans for the HAT step for mutants A) R688A. B) K666A calculated at the UB3LYP/def2SVP level. Reaction coordinate is defined as the difference between the  $O_p-H_R$  and  $C_B-H_R$  distances ( $d1(O_p-H_R) - d2(C_B-H_R)$ ).

## Cartesian Coordinates for the QM/MM Optimized Structures

### Dioxygen Activation Step – Substrate Binding Mode A (productive)

#### RC1

|    |            |            |            |   |            |            |            |
|----|------------|------------|------------|---|------------|------------|------------|
| C  | 34.8345976 | 55.6945873 | 45.6068694 | O | 26.5210842 | 58.9811569 | 41.2101400 |
| N  | 34.2171102 | 56.8845582 | 45.2892055 | C | 28.9340018 | 57.5814762 | 41.7218787 |
| H  | 34.5617768 | 57.8197429 | 45.5467335 | O | 26.6528155 | 59.8493536 | 43.2823840 |
| C  | 33.0763701 | 56.6013984 | 44.6296960 | H | 27.2638531 | 56.9696206 | 42.9916306 |
| H  | 32.3902635 | 57.3533602 | 44.2447791 | H | 28.3752742 | 58.1188626 | 43.7844989 |
| N  | 32.9284246 | 55.2845000 | 44.4998130 | H | 29.6389793 | 58.4208510 | 41.6458056 |
| C  | 34.0217785 | 54.7052499 | 45.1064475 | H | 28.3637811 | 57.4774480 | 40.7886821 |
| H  | 34.1603835 | 53.6255654 | 45.1341864 | O | 31.8105981 | 52.2936709 | 43.5848081 |
| C  | 34.4087979 | 55.1108885 | 40.1261753 | H | 31.4844035 | 51.7510016 | 44.3271697 |
| N  | 34.8903588 | 53.9372664 | 40.6618611 | H | 31.7916415 | 51.6689741 | 42.7617808 |
| H  | 35.7508963 | 53.4356111 | 40.3930443 | N | 29.5638350 | 48.2807414 | 48.5733582 |
| C  | 34.0204268 | 53.5228390 | 41.5999934 | H | 29.6274701 | 48.8864798 | 49.4018524 |
| H  | 34.1370230 | 52.6023174 | 42.1651910 | C | 29.3577326 | 48.8803702 | 47.2482750 |
| N  | 32.9953574 | 54.3656523 | 41.6984711 | H | 29.2453082 | 48.0796188 | 46.4917360 |
| C  | 33.2336058 | 55.3713463 | 40.7847609 | C | 28.0648773 | 49.7093707 | 47.1127549 |
| H  | 32.5632570 | 56.2186760 | 40.6702722 | H | 27.2606510 | 49.1629351 | 47.6335062 |
| Fe | 31.4797451 | 54.3528652 | 43.1809469 | H | 28.1452993 | 50.6947926 | 47.5889218 |
| O  | 30.2073167 | 54.7940226 | 44.7732855 | C | 27.6487239 | 49.8560369 | 45.6444413 |
| O  | 29.0270401 | 55.1642840 | 44.6744715 | O | 27.7542723 | 48.8231694 | 44.9291077 |
| C  | 29.0681133 | 54.9566081 | 41.6878684 | O | 27.2011804 | 50.9560808 | 45.2297128 |
| C  | 29.6908095 | 56.3459173 | 42.0109212 | C | 30.5989212 | 49.6574646 | 46.7345766 |
| C  | 27.8921846 | 57.8616237 | 42.8316596 | O | 30.4936388 | 50.4164703 | 45.7752436 |
| C  | 26.9264761 | 59.0211282 | 42.3936430 | H | 29.4575898 | 47.2992823 | 48.7327995 |
| O  | 28.0218269 | 54.8808697 | 41.0602900 | H | 31.5348700 | 49.4648686 | 47.2589552 |
| O  | 29.7752798 | 53.9710797 | 42.1334796 | H | 35.8262143 | 55.6444026 | 46.0565849 |
| O  | 30.8160653 | 56.3299796 | 42.5246642 | H | 34.9266992 | 55.7052227 | 39.3734394 |

**TS1**

C 34.8719189 55.6912132 45.6253924  
N 34.2542931 56.8782264 45.2949462  
H 34.5920611 57.8162786 45.5504141  
C 33.1208033 56.5882137 44.6272297  
H 32.4319115 57.3321183 44.2325515  
N 32.9780163 55.2708525 44.5044917  
C 34.0648909 54.6967003 45.1253339  
H 34.2033528 53.6173758 45.1620633  
C 34.4022991 55.1048989 40.1076140  
N 34.9114996 53.9449723 40.6512759  
H 35.7789903 53.4570654 40.3798764  
C 34.0565016 53.5167874 41.5939014  
H 34.1930584 52.6046612 42.1681148  
N 33.0120885 54.3367360 41.6827438  
C 33.2201115 55.3433898 40.7617442  
H 32.5156187 56.1639206 40.6506059  
Fe 31.5365536 54.3929732 43.1703873  
O 30.0732730 54.8301238 44.5917061  
O 29.1404409 55.6566333 44.0879339  
C 28.9242831 54.7853994 41.9082747  
C 29.5238846 56.1611109 42.7694841  
C 27.5990867 57.8526217 43.3029339  
C 26.7697048 58.9790994 42.6359099  
O 27.8465300 54.8648752 41.3598715  
O 29.7626094 53.8510296 42.0328260  
O 30.8160143 56.1462883 42.5899439  
O 26.4959384 58.8686393 41.4197396  
C 28.7682036 57.4465503 42.4119277

O 26.4139751 59.9197733 43.3854136  
H 26.9083175 57.0066563 43.4478159  
H 27.9362800 58.1833886 44.2951386  
H 29.5331954 58.2388971 42.3998002  
H 28.3875053 57.3395863 41.3865922  
O 31.8224945 52.3174274 43.5922827  
H 31.5053327 51.7911162 44.3512563  
H 31.7797041 51.6856314 42.7767228  
N 29.5912270 48.3070544 48.5683808  
H 29.6533537 48.9094069 49.3996557  
C 29.3734671 48.9186692 47.2493333  
H 29.2758124 48.1219540 46.4864556  
C 28.0712080 49.7316230 47.1188711  
H 27.2752248 49.1817372 47.6488930  
H 28.1469791 50.7231159 47.5832122  
C 27.6442060 49.8628904 45.6533531  
O 27.7658321 48.8292776 44.9399810  
O 27.1734227 50.9514097 45.2359491  
C 30.6040884 49.7200676 46.7425802  
O 30.4856188 50.5004690 45.8032710  
H 29.4684438 47.3271188 48.7252954  
H 31.5436772 49.5159288 47.2559675  
H 35.8659131 55.6458366 46.0703449  
H 34.9158963 55.7058234 39.3571649

**IM1**

C 34.9116621 55.7373829 45.7925667  
 N 34.2738321 56.9173660 45.4771223  
 H 34.6264145 57.8603582 45.6906909  
 C 33.0957472 56.6139291 44.8972616  
 H 32.3872951 57.3557582 44.5321904  
 N 32.9403816 55.2944845 44.8198282  
 C 34.0689058 54.7344640 45.3785262  
 H 34.2095941 53.6557877 45.4279800  
 C 34.4674400 55.1406582 40.2329231  
 N 34.9646314 53.9475424 40.7090788  
 H 35.7932038 53.4358434 40.3698204  
 C 34.1732087 53.5435549 41.7191838  
 H 34.3067138 52.6097643 42.2570337  
 N 33.1891133 54.4111071 41.9237061  
 C 33.3667086 55.4227918 41.0042803  
 H 32.7071552 56.2879267 40.9689693  
 Fe 31.6992250 54.3009382 43.4194921  
 O 29.7343305 53.7812078 43.5498607  
 O 28.7957630 54.8443738 43.3051206  
 C 29.7527327 54.3262603 40.4033417  
 C 29.3590409 55.9947316 42.9256989  
 C 27.9817512 58.1230126 43.4208829  
 C 26.9231312 59.0777883 42.7744954  
 O 28.8259916 54.9866207 40.1561002  
 O 30.6551743 53.6422020 40.6459080  
 O 30.5863262 56.1145471 42.9063506  
 O 26.4664809 58.7356307 41.6554059  
 C 28.3634491 57.0041547 42.4474851

O 26.6403488 60.0846913 43.4494371  
 H 27.5442227 57.7122524 44.3442817  
 H 28.8563060 58.7201265 43.7246625  
 H 28.7912315 57.4569671 41.5404695  
 H 27.4427411 56.4937817 42.1353581  
 O 32.0546236 52.1780076 43.6689333  
 H 31.7223256 51.6158318 44.3911581  
 H 31.9467829 51.6162723 42.8191280  
 N 29.5744212 48.2196654 48.5974277  
 H 29.6418677 48.8315932 49.4208706  
 C 29.3600572 48.8121306 47.2732006  
 H 29.2092730 48.0138595 46.5223693  
 C 28.0837595 49.6696288 47.1776501  
 H 27.2829551 49.1402171 47.7209100  
 H 28.2006771 50.6509196 47.6534561  
 C 27.6232511 49.8330828 45.7296248  
 O 27.7043601 48.8115708 44.9948383  
 O 27.1637323 50.9425679 45.3515716  
 C 30.6023464 49.5699033 46.7360837  
 O 30.5071519 50.2520394 45.7205071  
 H 29.4639744 47.2388054 48.7576982  
 H 31.5295413 49.4372920 47.2935692  
 H 35.9271970 55.6943795 46.1861473  
 H 34.9433302 55.7268479 39.4468084

**TS2**

C 34.9140708 55.6841777 45.7945220  
N 34.2792526 56.8648542 45.4739644  
H 34.6313670 57.8084070 45.6883554  
C 33.1071848 56.5659688 44.8856253  
H 32.4071752 57.3066877 44.5046142  
N 32.9501798 55.2443811 44.8103040  
C 34.0747594 54.6800654 45.3762261  
H 34.2146731 53.6013440 45.4229019  
C 34.4545497 55.1280680 40.2240503  
N 34.9569120 53.9396636 40.7078474  
H 35.7939607 53.4349078 40.3786308  
C 34.1557177 53.5246346 41.7032458  
H 34.2969936 52.5966835 42.2479646  
N 33.1563522 54.3820816 41.8904201  
C 33.3380642 55.3988126 40.9750030  
H 32.6691244 56.2555048 40.9353225  
Fe 31.6810009 54.3142068 43.4013194  
O 29.9648228 53.8471306 43.6774973  
O 28.9008033 55.2899760 43.4888471  
C 29.6522704 54.3852921 40.5225243  
C 29.5976129 56.2471843 42.9961697  
C 27.8568004 58.1080758 43.5304582  
C 26.8612319 59.0460243 42.7776102  
O 28.7185255 55.0511806 40.3251026  
O 30.5614499 53.6876893 40.7019555  
O 30.8453949 56.1467102 42.8026966  
O 26.5444128 58.7013966 41.6098178  
C 28.8572959 57.4858817 42.5583296

O 26.4557720 60.0350117 43.4187667  
H 27.2480986 57.3187836 44.0011171  
H 28.3457453 58.6697844 44.3400214  
H 29.6191491 58.2104135 42.2342025  
H 28.2611698 57.2140914 41.6667501  
O 32.2839424 52.1841265 43.6602929  
H 31.8382014 51.6754144 44.3614155  
H 32.1131634 51.6272028 42.8108620  
N 29.5676675 48.2290571 48.5898280  
H 29.6401306 48.8420469 49.4121427  
C 29.3614261 48.8186889 47.2624104  
H 29.1995173 48.0193581 46.5154460  
C 28.0954434 49.6920641 47.1634329  
H 27.2882947 49.1756528 47.7097303  
H 28.2259616 50.6744946 47.6340108  
C 27.6370980 49.8530080 45.7135178  
O 27.6980034 48.8241125 44.9878321  
O 27.1992081 50.9685532 45.3264882  
C 30.6103382 49.5645564 46.7226965  
O 30.5260851 50.2282886 45.6937874  
H 29.4618535 47.2478626 48.7511737  
H 31.5316470 49.4423762 47.2921948  
H 35.9298598 55.6487549 46.1882023  
H 34.9363837 55.7170576 39.4436699

**IM2**

|    |             |            |            |   |            |            |            |
|----|-------------|------------|------------|---|------------|------------|------------|
| C  | 34.8778964  | 55.6789647 | 45.7678580 | O | 26.4440248 | 60.0460147 | 43.4035340 |
| N  | 34.2393698  | 56.8602913 | 45.4540368 | H | 27.2797827 | 57.3580328 | 43.9597109 |
| H  | 34.5892139  | 57.8036045 | 45.6755853 | H | 28.3397231 | 58.7172248 | 44.3707160 |
| C  | 33.0725427  | 56.5627004 | 44.8563886 | H | 29.7658195 | 58.2521474 | 42.3732136 |
| H  | 32.3681425  | 57.3008975 | 44.4789672 | H | 28.4158769 | 57.3420326 | 41.6604045 |
| N  | 32.9234531  | 55.2395614 | 44.7686038 | O | 32.4082740 | 52.1956204 | 43.6647144 |
| C  | 34.0472513  | 54.6737610 | 45.3366969 | H | 31.9233400 | 51.7281622 | 44.3685060 |
| H  | 34.1908321  | 53.5952640 | 45.3741270 | H | 32.1993542 | 51.6341068 | 42.8237670 |
| C  | 34.4398806  | 55.1341351 | 40.1973146 | N | 29.5547365 | 48.2137618 | 48.5991253 |
| N  | 34.9528694  | 53.9539211 | 40.6912191 | H | 29.6296842 | 48.8279661 | 49.4200717 |
| H  | 35.7962893  | 53.4546841 | 40.3679002 | C | 29.3562344 | 48.7995590 | 47.2696690 |
| C  | 34.1556084  | 53.5344886 | 41.6846215 | H | 29.1822138 | 48.0006156 | 46.5251495 |
| H  | 34.3065691  | 52.6141298 | 42.2385704 | C | 28.0997499 | 49.6865605 | 47.1702770 |
| N  | 33.14440024 | 54.3827955 | 41.8595587 | H | 27.2904856 | 49.1835009 | 47.7258306 |
| C  | 33.3155612  | 55.3974867 | 40.9379999 | H | 28.2427863 | 50.6715351 | 47.6320573 |
| H  | 32.6347274  | 56.2443000 | 40.8894638 | C | 27.6321931 | 49.8417484 | 45.7223786 |
| Fe | 31.6688828  | 54.3251041 | 43.3460563 | O | 27.6895604 | 48.8111171 | 44.9990688 |
| O  | 30.0805343  | 53.5790550 | 43.6053227 | O | 27.1892512 | 50.9549592 | 45.3362941 |
| O  | 28.8449847  | 55.3543605 | 43.5582292 | C | 30.6115743 | 49.5307867 | 46.7287519 |
| C  | 29.5978713  | 54.4214932 | 40.5316433 | O | 30.5371942 | 50.1799566 | 45.6897710 |
| C  | 29.5622798  | 56.2423257 | 43.0572205 | H | 29.4566106 | 47.2316555 | 48.7597806 |
| C  | 27.8988484  | 58.1619580 | 43.5295834 | H | 31.5300382 | 49.4176175 | 47.3046711 |
| C  | 26.9209035  | 59.0933906 | 42.7542930 | H | 35.8909829 | 55.6423721 | 46.1683364 |
| O  | 28.6459964  | 55.0712187 | 40.3742789 | H | 34.9263226 | 55.7255946 | 39.4216754 |
| O  | 30.5291592  | 53.7417965 | 40.6637838 |   |            |            |            |
| O  | 30.8325511  | 56.0671661 | 42.8344917 |   |            |            |            |
| O  | 26.6737579  | 58.7834456 | 41.5598296 |   |            |            |            |
| C  | 28.9507284  | 57.5512393 | 42.6081037 |   |            |            |            |

**IM3**

C 34.8651383 55.6135232 45.7504965  
 N 34.2197950 56.7895756 45.4315652  
 H 34.5603458 57.7346455 45.6529035  
 C 33.0571390 56.4750279 44.8280156  
 H 32.3519551 57.2091793 44.4478361  
 N 32.9169010 55.1540283 44.7390499  
 C 34.0426198 54.6024587 45.3132448  
 H 34.1956014 53.5254081 45.3470565  
 C 34.4222544 55.1460171 40.1730379  
 N 34.9543817 53.9816146 40.6839248  
 H 35.8082202 53.4946955 40.3723512  
 C 34.1470402 53.5530791 41.6672013  
 H 34.3185434 52.6444516 42.2338099  
 N 33.1106445 54.3731910 41.8169182  
 C 33.2769421 55.3835985 40.8927406  
 H 32.5732054 56.2094148 40.8203922  
 Fe 31.5951782 54.2156294 43.3136464  
 O 30.1651474 53.3393680 43.3149435  
 O 29.0982422 55.9047255 44.3905977  
 C 29.4334789 54.5285458 40.6501158  
 C 29.6632125 56.4120765 43.4343534  
 C 28.1361777 58.4479563 43.6022095  
 C 27.0336362 59.1587866 42.8208365  
 O 28.3895370 55.0384962 40.7539903  
 O 30.4448813 53.9895808 40.4801916  
 O 30.7773398 55.9810115 42.8970173  
 O 26.7256463 58.8229483 41.6585124  
 C 29.0898900 57.6509644 42.7204988

O 26.4262216 60.0765285 43.4407355  
 H 27.6197638 57.7577947 44.2851535  
 H 28.6550098 59.1744859 44.2464856  
 H 29.9143082 58.2611935 42.3226539  
 H 28.5286220 57.2728773 41.8485192  
 O 32.5452252 52.2061696 43.7035028  
 H 31.9968747 51.7854456 44.3887617  
 H 32.3068509 51.6528023 42.8687962  
 N 29.5297197 48.1941849 48.6049237  
 H 29.6104886 48.8112319 49.4230235  
 C 29.3358581 48.7730995 47.2722148  
 H 29.1629540 47.9705686 46.5315810  
 C 28.0782965 49.6579907 47.1683871  
 H 27.2706982 49.1558185 47.7271168  
 H 28.2194873 50.6459998 47.6234733  
 C 27.6075658 49.8053088 45.7210338  
 O 27.6665422 48.7738665 45.0005434  
 O 27.1575494 50.9146481 45.3318675  
 C 30.5917756 49.5042104 46.7312928  
 O 30.5206105 50.1358518 45.6828610  
 H 29.4459917 47.2109737 48.7669635  
 H 31.5069362 49.4049439 47.3149823  
 H 35.8755732 55.5904254 46.1586068  
 H 34.9139930 55.7389989 39.4019141



**Dioxygen Activation – Substrate Binding Mode B  
(unproductive)**

**RC1'**

|    |            |            |            |
|----|------------|------------|------------|
| C  | 28.8801502 | 55.5051573 | 56.9429404 |
| N  | 28.4123123 | 56.4912684 | 57.7802388 |
| H  | 27.9052470 | 57.3344730 | 57.4872973 |
| C  | 28.7022043 | 56.1252998 | 59.0489537 |
| H  | 28.4450901 | 56.7147690 | 59.9265070 |
| N  | 29.3307173 | 54.9521527 | 59.0668326 |
| C  | 29.4464309 | 54.5563559 | 57.7535125 |
| H  | 29.9063120 | 53.6146337 | 57.4657657 |
| C  | 25.3096956 | 53.5861503 | 60.0166560 |
| N  | 25.6626134 | 52.4664386 | 59.2964650 |
| H  | 25.0408278 | 51.8803188 | 58.7186491 |
| C  | 26.9784471 | 52.2499709 | 59.4736062 |
| H  | 27.5308722 | 51.4501289 | 58.9848564 |
| N  | 27.4963990 | 53.1679617 | 60.2879965 |
| C  | 26.4610614 | 54.0102948 | 60.6337320 |
| H  | 26.6063213 | 54.8602714 | 61.2965589 |
| Fe | 29.5956034 | 53.5021677 | 60.6796117 |
| O  | 30.1254183 | 51.9384290 | 59.6319450 |
| O  | 29.8655560 | 51.4782241 | 58.4613098 |
| C  | 29.4600220 | 53.3181103 | 63.5631190 |
| C  | 29.4769343 | 54.8454211 | 63.2680688 |
| C  | 29.4562888 | 57.2543853 | 64.1930213 |
| C  | 29.5376252 | 58.0112907 | 65.5488570 |
| O  | 29.4591090 | 52.9253992 | 64.7224055 |
| O  | 29.4004564 | 52.5966192 | 62.5032408 |
| O  | 29.2549690 | 55.1890522 | 62.1061827 |

|   |            |            |            |
|---|------------|------------|------------|
| O | 30.4851804 | 58.8257104 | 65.6734880 |
| C | 29.7514367 | 55.7739732 | 64.3948847 |
| O | 28.6580098 | 57.7327055 | 66.3964766 |
| H | 30.1473545 | 57.7083786 | 63.4710120 |
| H | 28.4304633 | 57.3424096 | 63.8014439 |
| H | 29.2163217 | 55.3919514 | 65.2765282 |
| H | 30.8160884 | 55.5923065 | 64.6547502 |
| N | 34.7938944 | 51.3796143 | 59.1947463 |
| H | 35.5370779 | 52.0724414 | 59.1515533 |
| C | 33.4702184 | 51.7967264 | 58.7480764 |
| H | 32.7339251 | 51.0449094 | 59.0798296 |
| C | 33.0982582 | 53.1340756 | 59.4283944 |
| H | 33.9943032 | 53.7781447 | 59.4886952 |
| H | 32.3723953 | 53.6716600 | 58.8052510 |
| C | 32.4856293 | 53.0295020 | 60.8248140 |
| O | 32.9162215 | 52.2448753 | 61.6663203 |
| O | 31.4962679 | 53.8456907 | 61.0395801 |
| C | 33.3248480 | 51.9833184 | 57.2157410 |
| O | 34.3092080 | 52.2543075 | 56.5500932 |
| H | 35.1241220 | 50.4670616 | 58.9535643 |
| H | 32.3232096 | 51.8399282 | 56.8104930 |
| H | 28.7928693 | 55.4924892 | 55.8565299 |
| H | 24.3084136 | 54.0164108 | 60.0360585 |

**TS1'**

C 28.8581627 55.7598789 56.8132057  
N 28.2880427 56.7682135 57.5530668  
H 27.7460272 57.5616909 57.1883087  
C 28.5687276 56.5377942 58.8527560  
H 28.2282214 57.1773976 59.6644816  
N 29.2956911 55.4360306 58.9864594  
C 29.4861609 54.9435496 57.7174282  
H 30.0651875 54.0429007 57.5282485  
C 25.4827619 53.6667934 59.9082510  
N 25.8517755 52.5162295 59.2461876  
H 25.2294941 51.8831318 58.7211320  
C 27.1851566 52.3647782 59.3894562  
H 27.7295465 51.5228473 58.9663371  
N 27.7014488 53.3578129 60.1097761  
C 26.6405661 54.1742430 60.4429461  
H 26.7725767 55.0627561 61.0557200  
Fe 29.7345691 54.0650710 60.5981394  
O 30.2457143 52.2651867 61.2863098  
O 30.6803354 53.0453405 62.2613302  
C 29.0399688 52.8113746 63.9812630  
C 29.4606104 54.7260250 63.2774702  
C 29.5589812 57.0935542 64.2445104  
C 29.6727837 57.8763796 65.5813401  
O 29.5569070 52.7901459 65.0703726  
O 28.3424713 52.2029403 63.2201195

O 29.1913273 55.2008789 62.1722243  
O 30.6144485 58.7041087 65.6634028  
C 29.8957536 55.6090228 64.4078738  
O 28.8061077 57.6247682 66.4503336  
H 30.1925184 57.5614040 63.4800936  
H 28.5091204 57.1572092 63.9149255  
H 29.4650685 55.2093199 65.3339457  
H 30.9828446 55.4149166 64.5233834  
N 34.9008535 51.3920118 59.1506079  
H 35.6619191 52.0635239 59.2051643  
C 33.6540629 51.8240678 58.5529426  
H 32.8302137 51.2137256 58.9761816  
C 33.4026478 53.3004078 58.9108549  
H 34.3637844 53.8383390 58.8961025  
H 32.7599124 53.7325028 58.1337287  
C 32.7002237 53.5531976 60.2383498  
O 33.1637285 53.1132911 61.2832612  
O 31.6179610 54.2594730 60.0822399  
C 33.5736279 51.8002170 57.0081789  
O 34.5807806 51.9347727 56.3387583  
H 35.2101266 50.4574126 58.9749775  
H 32.5617420 51.6998828 56.6156408  
H 28.7898935 55.6500350 55.7309212  
H 24.4664443 54.0563586 59.9665917

**IM1'**

C 28.8076471 55.6395288 56.7569011  
N 28.2723405 56.6511928 57.5194333  
H 27.7559424 57.4689010 57.1732490  
C 28.5317624 56.3706214 58.8144467  
H 28.2058561 56.9903665 59.6469468  
N 29.2110189 55.2359077 58.9241184  
C 29.3902092 54.7699450 57.6442243  
H 29.9210435 53.8428531 57.4399427  
C 25.2774977 53.5709348 59.9259743  
N 25.6715303 52.4578035 59.2173436  
H 25.0736901 51.8553217 58.6325077  
C 26.9909448 52.2744663 59.4353541  
H 27.5564980 51.4609563 58.9850125  
N 27.4715042 53.2043103 60.2573106  
C 26.4021501 54.0202325 60.5702050  
H 26.5213159 54.8752146 61.2293674  
Fe 29.4716269 53.9714003 60.6326561  
O 30.9116278 54.6186683 61.8421301  
O 30.5039733 55.3534368 62.9899894  
C 29.7132863 53.0113193 64.2418631  
C 29.2558296 55.7857042 62.9465819  
C 29.7867257 57.6639716 64.5534292  
C 29.4940308 58.3439652 65.9052836  
O 30.0927412 53.4457753 65.2492568  
O 29.2643267 52.5309925 63.2818622  
O 28.5245824 55.5637206 61.9813670  
O 30.3649747 59.1793028 66.2547919  
C 28.8609045 56.4985190 64.2097498

O 28.4503466 58.0342148 66.5202546  
H 30.8313318 57.3269636 64.5814239  
H 29.7446768 58.4373408 63.7672460  
H 27.8136684 56.8070044 64.1207875  
H 28.9132422 55.7730958 65.0365436  
N 34.7509628 51.3077738 59.1445185  
H 35.4732916 52.0226881 59.1928888  
C 33.4494027 51.7108752 58.6321857  
H 32.7558470 50.8589898 58.7704151  
C 32.9093083 52.8784222 59.5125706  
H 33.7571314 53.4078976 59.9728153  
H 32.3478359 53.5970001 58.8994727  
C 31.9709111 52.3135190 60.5852691  
O 32.4650669 51.7858831 61.5955033  
O 30.7211073 52.3491169 60.2993601  
C 33.3986345 52.0587336 57.1265368  
O 34.4161228 52.3045433 56.5056264  
H 35.1187169 50.4160326 58.8808404  
H 32.4012000 52.0005055 56.6908762  
H 28.7396016 55.5704090 55.6712407  
H 24.2722946 53.9921697 59.9399007

**HAT step**

**Snapshot 1**

**RC2**

|    |            |            |            |
|----|------------|------------|------------|
| C  | 41.3781687 | 30.9548196 | 36.4108864 |
| N  | 40.4840320 | 29.9206676 | 36.2423965 |
| H  | 39.8064033 | 29.8384323 | 35.4713626 |
| C  | 40.6282029 | 29.0697149 | 37.2724611 |
| H  | 40.0661946 | 28.1476938 | 37.4285143 |
| N  | 41.5837625 | 29.5148170 | 38.0907741 |
| C  | 42.0612593 | 30.6917763 | 37.5644997 |
| H  | 42.8677195 | 31.2350658 | 38.0478101 |
| C  | 43.7037094 | 26.4607112 | 35.6980298 |
| N  | 44.7590544 | 27.3417400 | 35.7739789 |
| H  | 45.4920803 | 27.5020208 | 35.0655642 |
| C  | 44.6592807 | 27.9991676 | 36.9422687 |
| H  | 45.3588814 | 28.7627434 | 37.2726633 |
| N  | 43.6034643 | 27.5678944 | 37.6276859 |
| C  | 42.9908475 | 26.6030527 | 36.8610934 |
| H  | 42.0853727 | 26.0927422 | 37.1876901 |
| Fe | 42.7717553 | 28.4395783 | 39.3552864 |
| O  | 43.7721169 | 29.7236937 | 39.5129509 |
| O  | 39.8672642 | 26.4747553 | 39.0241205 |
| C  | 40.4108326 | 26.6605571 | 40.0974263 |
| C  | 38.8764227 | 25.0325337 | 41.4582539 |
| C  | 38.5023307 | 24.5762085 | 42.9075251 |
| O  | 41.3902281 | 27.5445834 | 40.2619681 |
| O  | 37.8163631 | 23.5378885 | 42.9717765 |
| C  | 40.1003602 | 25.9348977 | 41.4003462 |
| O  | 38.8860966 | 25.2862100 | 43.8739570 |

|   |            |            |            |
|---|------------|------------|------------|
| H | 37.9950801 | 25.5632957 | 41.0569800 |
| H | 39.0014934 | 24.1320650 | 40.8389524 |
| H | 41.0156047 | 25.3691144 | 41.6565075 |
| H | 40.0126713 | 26.6959211 | 42.1885645 |
| O | 44.0005042 | 27.2198370 | 40.4816875 |
| H | 44.9611332 | 27.5206366 | 40.4587365 |
| H | 43.6712642 | 27.2916866 | 41.4240379 |
| N | 45.1251217 | 33.9593263 | 43.9730477 |
| H | 44.2821321 | 34.0105185 | 44.5509915 |
| C | 45.0652349 | 33.0874580 | 42.7968468 |
| H | 46.1003942 | 32.8635846 | 42.4798582 |
| C | 44.4463859 | 31.7511044 | 43.2131450 |
| H | 43.5182484 | 31.9229477 | 43.7797293 |
| H | 44.1430530 | 31.1914110 | 42.3097522 |
| C | 45.3670612 | 30.8008746 | 43.9981923 |
| O | 44.7739875 | 29.8911059 | 44.6489069 |
| O | 46.6110232 | 30.9161904 | 43.8930985 |
| C | 44.2681240 | 33.6854330 | 41.6127087 |
| O | 43.3913168 | 34.5011318 | 41.8426265 |
| H | 45.5249056 | 34.8614540 | 43.8108415 |
| H | 44.5676669 | 33.3751532 | 40.6116754 |
| H | 41.5373561 | 31.7740197 | 35.7097177 |
| H | 43.4829856 | 25.8239293 | 34.8413752 |

**TS<sub>proR</sub>**

|   |            |            |            |
|---|------------|------------|------------|
| C | 41.5806719 | 31.2200481 | 36.6388110 |
| N | 40.6413687 | 30.2172826 | 36.5473018 |
| H | 39.9654882 | 30.0975216 | 35.7799264 |
| C | 40.7384995 | 29.4574353 | 37.6560420 |
| H | 40.1572049 | 28.5580571 | 37.8646223 |
| N | 41.6942848 | 29.9306937 | 38.4538073 |
| C | 42.2295336 | 31.0316677 | 37.8316824 |
| H | 43.0364461 | 31.5964634 | 38.2889448 |

|    |            |            |            |    |                          |            |            |
|----|------------|------------|------------|----|--------------------------|------------|------------|
| C  | 43.7168140 | 26.8432008 | 36.1256949 | O  | 44.6744227               | 29.8891592 | 44.4816596 |
| N  | 44.8164861 | 27.6735001 | 36.1330063 | O  | 46.4746120               | 30.9042814 | 43.6233133 |
| H  | 45.5409439 | 27.7544098 | 35.4052639 | C  | 44.1521178               | 33.6167216 | 41.3328241 |
| C  | 44.7777127 | 28.3982713 | 37.2706822 | O  | 43.2635757               | 34.4200096 | 41.5395152 |
| H  | 45.5378363 | 29.1309740 | 37.5344920 | H  | 45.3969827               | 34.7805122 | 43.6028220 |
| N  | 43.7213874 | 28.0691307 | 38.0099096 | H  | 44.5118503               | 33.3333862 | 40.3436928 |
| C  | 43.0466455 | 27.0915718 | 37.3017588 | H  | 41.7372256               | 31.9896682 | 35.8830049 |
| H  | 42.1298429 | 26.6393285 | 37.6803592 | H  | 43.4965154               | 26.1291416 | 35.3321867 |
| Fe | 42.7993840 | 28.8736007 | 39.9147927 |    |                          |            |            |
| O  | 43.5387221 | 30.1806879 | 40.8461088 |    | <b>TS<sub>pros</sub></b> |            |            |
| O  | 40.1356508 | 26.7624133 | 39.2953483 | C  | 41.5707676               | 31.2131989 | 36.6155027 |
| C  | 40.5563948 | 26.9393124 | 40.4294244 | N  | 40.6203191               | 30.2200729 | 36.5346831 |
| C  | 39.1014916 | 25.0508134 | 41.5320717 | H  | 39.9344762               | 30.1074223 | 35.7751344 |
| C  | 38.7244887 | 24.4751917 | 42.9222418 | C  | 40.7240512               | 29.4568173 | 37.6396552 |
| O  | 41.3334220 | 27.9624685 | 40.7629189 | H  | 40.1369061               | 28.5630001 | 37.8576476 |
| O  | 38.3035903 | 23.2894206 | 42.9451673 | N  | 41.6960362               | 29.9198401 | 38.4237505 |
| C  | 40.2728118 | 26.0241272 | 41.6102197 | C  | 42.2362060               | 31.0152106 | 37.7970073 |
| O  | 38.8382674 | 25.2162782 | 43.9293873 | H  | 43.0632073               | 31.5640750 | 38.2370880 |
| H  | 38.2031700 | 25.5678518 | 41.1485224 | C  | 43.6678958               | 26.7515291 | 36.0752770 |
| H  | 39.3073261 | 24.2135723 | 40.8513357 | N  | 44.7579280               | 27.5918494 | 36.0537252 |
| H  | 41.2098064 | 25.4680061 | 41.8015548 | H  | 45.4687916               | 27.6761782 | 35.3131300 |
| H  | 40.1331266 | 26.6679141 | 42.4860565 | C  | 44.7257382               | 28.3363895 | 37.1757230 |
| O  | 43.9566447 | 27.2782899 | 40.6890138 | H  | 45.4767372               | 29.0906022 | 37.3914580 |
| H  | 44.9408448 | 27.4520236 | 40.5814888 | N  | 43.6848411               | 28.0091894 | 37.9399789 |
| H  | 43.7430790 | 27.2760609 | 41.6589775 | C  | 43.0109788               | 27.0122759 | 37.2565406 |
| N  | 44.9472221 | 33.8953172 | 43.7216391 | H  | 42.1023041               | 26.5581651 | 37.6514958 |
| H  | 44.1316128 | 33.9320951 | 44.3369228 | Fe | 42.7653178               | 28.8505751 | 39.8778880 |
| C  | 44.9047092 | 33.0004321 | 42.5439390 | O  | 43.4306872               | 30.1590245 | 40.8771083 |
| H  | 45.9496633 | 32.7833985 | 42.2579516 | O  | 40.0714507               | 26.7826597 | 39.2838986 |
| C  | 44.2984167 | 31.6559633 | 42.9298277 | C  | 40.5187135               | 26.9329646 | 40.4105922 |
| H  | 43.3012076 | 31.7594929 | 43.3866210 | C  | 39.0747818               | 25.0506000 | 41.5411901 |
| H  | 43.9378033 | 30.9044545 | 41.8757342 | C  | 38.7248479               | 24.4757858 | 42.9465902 |
| C  | 45.2356143 | 30.7479543 | 43.7431337 | O  | 41.3206244               | 27.9481828 | 40.7332852 |

|   |            |            |            |    |            |            |            |
|---|------------|------------|------------|----|------------|------------|------------|
| O | 38.3268207 | 23.2870939 | 42.9839042 | C  | 40.5847436 | 29.0615517 | 37.2340233 |
| C | 40.2538835 | 26.0155780 | 41.5904057 | H  | 39.9980694 | 28.1480075 | 37.3272461 |
| O | 38.8480682 | 25.2470102 | 43.9344205 | N  | 41.5107988 | 29.4555342 | 38.1015490 |
| H | 38.1742989 | 25.5773300 | 41.1753918 | C  | 42.0355118 | 30.6343438 | 37.6262960 |
| H | 39.2608732 | 24.2098512 | 40.8587694 | H  | 42.8234555 | 31.1540873 | 38.1655925 |
| H | 41.1920164 | 25.4543766 | 41.7634121 | C  | 43.7020021 | 26.5275024 | 35.8081260 |
| H | 40.1359038 | 26.6556206 | 42.4731299 | N  | 44.7587545 | 27.4070735 | 35.8815221 |
| O | 43.9605575 | 27.2789353 | 40.6433436 | H  | 45.4918045 | 27.5627784 | 35.1717821 |
| H | 44.9324525 | 27.5003058 | 40.5422682 | C  | 44.6705216 | 28.0564375 | 37.0568399 |
| H | 43.7348019 | 27.2677724 | 41.6104310 | H  | 45.3874749 | 28.8079944 | 37.3804549 |
| N | 45.0322781 | 33.8504916 | 43.5975498 | N  | 43.6181657 | 27.6264287 | 37.7515114 |
| H | 44.1807205 | 33.8337715 | 44.1625333 | C  | 42.9995357 | 26.6652822 | 36.9784449 |
| C | 45.1106521 | 33.0593240 | 42.3520887 | H  | 42.0969609 | 26.1523444 | 37.3114171 |
| H | 46.1447997 | 33.1798443 | 41.9786628 | Fe | 42.6482888 | 28.3435554 | 39.5122103 |
| C | 44.9992853 | 31.5143548 | 42.4429743 | O  | 43.3060774 | 29.8733761 | 40.3154334 |
| H | 43.9765242 | 30.8944023 | 41.8540137 | O  | 40.1023117 | 26.2832054 | 39.0868098 |
| H | 45.7114202 | 31.1414380 | 41.6967833 | C  | 40.4494725 | 26.5361944 | 40.2264190 |
| C | 45.4319100 | 30.8058757 | 43.7379689 | C  | 38.9378843 | 24.8020788 | 41.5112045 |
| O | 44.6469053 | 30.0992558 | 44.3941223 | C  | 38.6371914 | 24.3191358 | 42.9690381 |
| O | 46.6702016 | 30.9384037 | 43.9506494 | O  | 41.2399457 | 27.5879152 | 40.4965488 |
| C | 44.2047046 | 33.6288123 | 41.2110771 | O  | 38.2886005 | 23.1262246 | 43.1034141 |
| O | 43.3387178 | 34.4240805 | 41.5093943 | C  | 40.1261567 | 25.7541201 | 41.4801825 |
| H | 45.4546262 | 34.7553383 | 43.5441937 | O  | 38.7629733 | 25.1811434 | 43.8805780 |
| H | 44.4578949 | 33.3503679 | 40.1881253 | H  | 38.0331339 | 25.3192479 | 41.1427507 |
| H | 41.7257416 | 31.9819724 | 35.8585103 | H  | 39.0979498 | 23.9198947 | 40.8762106 |
| H | 43.4408088 | 26.0478344 | 35.2744572 | H  | 41.0512766 | 25.1986038 | 41.7295260 |
|   |            |            |            | H  | 39.9982733 | 26.4782379 | 42.2948584 |
|   |            |            |            | O  | 43.9500300 | 27.0144883 | 40.5354561 |
|   |            |            |            | H  | 44.9036601 | 27.3247194 | 40.4660676 |
|   |            |            |            | H  | 43.6724603 | 27.0993083 | 41.4892529 |
|   |            |            |            | N  | 45.0962547 | 33.9927822 | 44.0017009 |
|   |            |            |            | H  | 44.2540423 | 34.0405224 | 44.5809972 |
|   |            |            |            | C  | 45.0660670 | 33.0671693 | 42.8592178 |

**IM4**

|   |            |            |            |
|---|------------|------------|------------|
| C | 41.4037891 | 30.9494948 | 36.4521268 |
| N | 40.4942266 | 29.9439450 | 36.2230842 |
| H | 39.8357550 | 29.8951678 | 35.4335322 |

|                         |            |            |            |   |            |            |            |
|-------------------------|------------|------------|------------|---|------------|------------|------------|
| H                       | 46.1100000 | 32.8433415 | 42.5742404 | O | 40.1185300 | 26.8968815 | 39.3337221 |
| C                       | 44.4789648 | 31.7892097 | 43.3612715 | C | 40.5521630 | 27.0148318 | 40.4714262 |
| H                       | 43.3907253 | 31.7053571 | 43.4448682 | C | 39.1072966 | 25.0899749 | 41.5387841 |
| H                       | 42.6825668 | 30.3895829 | 40.8470816 | C | 38.7353347 | 24.4881931 | 42.9331762 |
| C                       | 45.3209777 | 30.7308446 | 43.9724780 | O | 41.3462193 | 28.0253709 | 40.8287584 |
| O                       | 44.7019324 | 29.7917052 | 44.5599352 | O | 38.3482662 | 23.2993647 | 42.9426434 |
| O                       | 46.5757757 | 30.8223853 | 43.8716915 | C | 40.2800019 | 26.0601197 | 41.6181795 |
| C                       | 44.2711657 | 33.6122377 | 41.6372311 | O | 38.8369827 | 25.2605331 | 43.9262149 |
| O                       | 43.3565185 | 34.3895759 | 41.8433730 | H | 38.2107010 | 25.6189024 | 41.1670355 |
| H                       | 45.4996598 | 34.8905634 | 43.8249929 | H | 39.3075434 | 24.2603936 | 40.8469365 |
| H                       | 44.6075632 | 33.3084294 | 40.6459671 | H | 41.2208173 | 25.4999075 | 41.7796440 |
| H                       | 41.5901993 | 31.7820572 | 35.7737771 | H | 40.1520875 | 26.6731239 | 42.5186798 |
| H                       | 43.4868184 | 25.8799838 | 34.9581362 | O | 44.0418098 | 27.4679057 | 40.7931702 |
| <b>TS<sub>REB</sub></b> |            |            |            | H | 45.0339078 | 27.5800078 | 40.6732182 |
| C                       | 41.6202821 | 31.2851478 | 36.6461466 | H | 43.8150732 | 27.4020501 | 41.7580537 |
| N                       | 40.6325057 | 30.3270169 | 36.6278076 | N | 44.8807075 | 33.9052382 | 43.6730537 |
| H                       | 39.9308939 | 30.2065216 | 35.8833143 | H | 44.0690820 | 33.9461675 | 44.2932291 |
| C                       | 40.7362882 | 29.6039882 | 37.7606346 | C | 44.8502878 | 32.9966244 | 42.5019617 |
| H                       | 40.1346208 | 28.7294328 | 38.0185880 | H | 45.8978500 | 32.7721168 | 42.2338183 |
| N                       | 41.7446466 | 30.0582126 | 38.5061424 | C | 44.2657428 | 31.6764992 | 42.9596283 |
| C                       | 42.3088711 | 31.1044404 | 37.8172048 | H | 43.2265193 | 31.6831632 | 43.2970978 |
| H                       | 43.1734710 | 31.6349111 | 38.2043633 | H | 42.8045049 | 31.1216039 | 41.0971774 |
| C                       | 43.6967776 | 26.8512246 | 36.1362379 | C | 45.2065265 | 30.7435004 | 43.6970551 |
| N                       | 44.8023828 | 27.6732209 | 36.1501736 | O | 44.6720733 | 29.8740045 | 44.4407522 |
| H                       | 45.5293069 | 27.7526429 | 35.4249791 | O | 46.4433121 | 30.9130337 | 43.5421690 |
| C                       | 44.7611133 | 28.3993453 | 37.2862601 | C | 44.1021602 | 33.5942761 | 41.2808741 |
| H                       | 45.5251001 | 29.1268536 | 37.5536757 | O | 43.1742511 | 34.3548019 | 41.4786421 |
| N                       | 43.6972364 | 28.0790377 | 38.0197804 | H | 45.3552284 | 34.7790269 | 43.5667733 |
| C                       | 43.0196255 | 27.1062678 | 37.3068814 | H | 44.4956375 | 33.3402406 | 40.2966441 |
| H                       | 42.0959542 | 26.6635518 | 37.6799726 | H | 41.7693144 | 32.0347383 | 35.8689911 |
| Fe                      | 42.7965539 | 28.8660101 | 39.9127741 | H | 43.4814527 | 26.1340593 | 35.3441671 |
| O                       | 43.5091715 | 30.4687778 | 41.2380542 |   |            |            |            |

| PD |            |            | H          | 43.7626552 | 26.7581203 | 41.3939401 |            |
|----|------------|------------|------------|------------|------------|------------|------------|
| C  | 41.4453300 | 30.9360990 | 36.4701812 | N          | 45.0471785 | 33.9318792 | 43.8913894 |
| N  | 40.5233130 | 29.9394127 | 36.2589741 | H          | 44.2226521 | 33.9934325 | 44.4954830 |
| H  | 39.8456910 | 29.9024114 | 35.4858824 | C          | 44.9434092 | 33.0606954 | 42.7180977 |
| C  | 40.6482010 | 29.0488312 | 37.2625235 | H          | 45.9676916 | 32.8306163 | 42.3685153 |
| H  | 40.0551726 | 28.1405713 | 37.3550646 | C          | 44.3434465 | 31.7302645 | 43.2038353 |
| N  | 41.6032222 | 29.4214668 | 38.1059725 | H          | 43.4898361 | 31.9601255 | 43.8595596 |
| C  | 42.1131726 | 30.6010965 | 37.6218016 | H          | 43.0945087 | 30.4696977 | 42.3701822 |
| H  | 42.9230583 | 31.1243883 | 38.1261781 | C          | 45.3297742 | 30.8070154 | 43.9711486 |
| C  | 43.7649339 | 26.3781075 | 35.5862504 | O          | 44.7777040 | 29.9340773 | 44.6887209 |
| N  | 44.7745957 | 27.3080788 | 35.6565568 | O          | 46.5613844 | 30.9266472 | 43.7556221 |
| H  | 45.4827261 | 27.5208757 | 34.9390541 | C          | 44.1064774 | 33.6774497 | 41.5581356 |
| C  | 44.6861241 | 27.9104656 | 36.8565932 | O          | 43.2302500 | 34.4728242 | 41.8401655 |
| H  | 45.3657810 | 28.6936036 | 37.1822836 | H          | 45.4668251 | 34.8261098 | 43.7357594 |
| N  | 43.6860865 | 27.4007682 | 37.5656752 | H          | 44.3964414 | 33.4214082 | 40.5391014 |
| C  | 43.0963839 | 26.4366119 | 36.7818731 | H          | 41.6041462 | 31.7687436 | 35.7849458 |
| H  | 42.2401783 | 25.8614897 | 37.1319942 | H          | 43.5315528 | 25.7723838 | 34.7106368 |
| Fe | 42.6706758 | 28.0214401 | 39.3213880 |            |            |            |            |
| O  | 43.8629561 | 30.9781446 | 42.0714900 |            |            |            |            |
| O  | 40.9452911 | 26.4861511 | 39.4603230 |            |            |            |            |
| C  | 40.9685565 | 26.7625794 | 40.6790295 |            |            |            |            |
| C  | 39.1996666 | 25.0026937 | 41.5902310 |            |            |            |            |
| C  | 38.7295937 | 24.4064718 | 42.9591816 |            |            |            |            |
| O  | 41.6434698 | 27.8088557 | 41.0680250 |            |            |            |            |
| O  | 38.3159220 | 23.2269069 | 42.9492942 |            |            |            |            |
| C  | 40.3966538 | 25.9224251 | 41.7896171 |            |            |            |            |
| O  | 38.8077293 | 25.1774106 | 43.9556484 |            |            |            |            |
| H  | 38.3487256 | 25.5705456 | 41.1693670 |            |            |            |            |
| H  | 39.4210320 | 24.1770784 | 40.8995285 |            |            |            |            |
| H  | 41.2520288 | 25.3176378 | 42.1499890 |            |            |            |            |
| H  | 40.1665465 | 26.6093132 | 42.6089747 |            |            |            |            |
| O  | 44.0347406 | 26.5929416 | 40.4754216 |            |            |            |            |
| H  | 44.9452712 | 26.9825147 | 40.3991472 |            |            |            |            |



**Snapshot 2**

**RC2**

|    |            |            |            |
|----|------------|------------|------------|
| C  | 44.1603082 | 29.1870617 | 46.0861427 |
| N  | 43.7165102 | 28.0520229 | 46.7288429 |
| H  | 42.7329661 | 27.7853546 | 46.8845941 |
| C  | 44.7878752 | 27.3429821 | 47.1185381 |
| H  | 44.7442960 | 26.3829712 | 47.6304311 |
| N  | 45.9034969 | 27.9746567 | 46.7530445 |
| C  | 45.5285500 | 29.1288564 | 46.1070407 |
| H  | 46.2716156 | 29.8085606 | 45.7011317 |
| C  | 45.6876912 | 25.0116873 | 43.4857742 |
| N  | 46.1271582 | 26.0608186 | 42.7096400 |
| H  | 45.9301013 | 26.2175127 | 41.7091361 |
| C  | 46.9062727 | 26.8421346 | 43.4777339 |
| H  | 47.4110867 | 27.7340341 | 43.1147015 |
| N  | 47.0019525 | 26.3370214 | 44.7068487 |
| C  | 46.2386263 | 25.1875465 | 44.7296723 |
| H  | 46.1438303 | 24.5830280 | 45.6327895 |
| Fe | 47.7655009 | 27.1680585 | 46.4934340 |
| O  | 48.4266513 | 28.6325610 | 46.1082791 |
| O  | 46.7373529 | 24.2878461 | 48.0410016 |
| C  | 47.5297703 | 25.0379718 | 48.5796838 |
| C  | 47.9876074 | 23.4936563 | 50.6175934 |
| C  | 48.9538558 | 23.2064818 | 51.8055229 |
| O  | 47.7291532 | 26.2852218 | 48.1614942 |
| O  | 49.9305261 | 23.9745421 | 51.9861519 |
| C  | 48.4215915 | 24.6745961 | 49.7571829 |
| O  | 48.6546094 | 22.2161265 | 52.5102002 |
| H  | 46.9898646 | 23.6730666 | 51.0512263 |

|   |            |            |            |
|---|------------|------------|------------|
| H | 47.8807336 | 22.5757801 | 50.0171436 |
| H | 49.4187397 | 24.4774059 | 49.3245976 |
| H | 48.5587234 | 25.5722433 | 50.3717927 |
| O | 49.5368984 | 26.1132062 | 46.1660261 |
| H | 49.9731271 | 26.3822954 | 45.2888180 |
| H | 50.1783840 | 26.3462613 | 46.9062396 |
| N | 52.4182029 | 32.8097480 | 47.3038120 |
| H | 52.6689407 | 32.7412714 | 48.2908640 |
| C | 51.4720755 | 31.8642903 | 46.7249745 |
| H | 51.8044233 | 31.6103153 | 45.7015750 |
| C | 51.4886220 | 30.5676387 | 47.5457742 |
| H | 51.3290333 | 30.7907650 | 48.6118323 |
| H | 50.6246666 | 29.9487289 | 47.2480498 |
| C | 52.7013200 | 29.6496301 | 47.3726214 |
| O | 52.7991257 | 28.6883384 | 48.1850311 |
| O | 53.4642944 | 29.8465966 | 46.3955560 |
| C | 49.9976544 | 32.3398716 | 46.7068536 |
| O | 49.6178135 | 33.0944431 | 47.5807857 |
| H | 52.3913535 | 33.7547135 | 46.9777879 |
| H | 49.3740938 | 31.9664043 | 45.8945966 |
| H | 43.514767  | 29.9164894 | 45.5978935 |
| H | 44.997468  | 24.2364940 | 43.1483203 |

**TS<sub>proR</sub>**

|   |            |            |            |
|---|------------|------------|------------|
| C | 44.2863086 | 29.3867120 | 46.0536540 |
| N | 43.9145276 | 28.2519972 | 46.7397568 |
| H | 42.9492866 | 27.9258638 | 46.8964356 |
| C | 45.0373123 | 27.6361075 | 47.1601792 |
| H | 45.0568132 | 26.6872851 | 47.6962240 |
| N | 46.1143308 | 28.3223135 | 46.7769868 |
| C | 45.6569961 | 29.4169666 | 46.0857000 |
| H | 46.3427681 | 30.1386373 | 45.6559702 |
| C | 45.8638748 | 25.3036531 | 43.6233799 |

|    |            |            |            |    |                          |            |            |
|----|------------|------------|------------|----|--------------------------|------------|------------|
| N  | 46.2998752 | 26.2942925 | 42.7703087 | O  | 53.2119482               | 29.7544964 | 46.3371215 |
| H  | 46.0904709 | 26.3850465 | 41.7654403 | C  | 49.8094561               | 32.3046082 | 46.5926696 |
| C  | 47.0975444 | 27.1221504 | 43.4723460 | O  | 49.4130593               | 33.0369377 | 47.4712296 |
| H  | 47.6030422 | 27.9778622 | 43.0312989 | H  | 52.2543512               | 33.6792131 | 46.9579048 |
| N  | 47.2112563 | 26.7126714 | 44.7345061 | H  | 49.2181877               | 31.9693310 | 45.7405792 |
| C  | 46.4376356 | 25.5693854 | 44.8436785 | H  | 43.5973724               | 30.0706141 | 45.5579605 |
| H  | 46.3476856 | 25.0290115 | 45.7871459 | H  | 45.2135702               | 24.4818452 | 43.3237088 |
| Fe | 48.0989276 | 27.5384369 | 46.5584211 |    |                          |            |            |
| O  | 49.1762029 | 28.9684913 | 46.6155152 |    | <b>TS<sub>pros</sub></b> |            |            |
| O  | 46.6929844 | 24.7559341 | 48.0963121 | C  | 44.2305003               | 29.3736512 | 46.0408426 |
| C  | 47.6159702 | 25.3750708 | 48.6014568 | N  | 43.8396204               | 28.2534569 | 46.7405815 |
| C  | 47.9689873 | 23.6517570 | 50.5118196 | H  | 42.8704992               | 27.9389679 | 46.8961997 |
| C  | 48.8821807 | 23.2398254 | 51.6931250 | C  | 44.9498116               | 27.6298754 | 47.1796073 |
| O  | 47.9638147 | 26.5939333 | 48.2220846 | H  | 44.9554354               | 26.6889630 | 47.7294611 |
| O  | 49.8635706 | 23.9575995 | 52.0060386 | N  | 46.0363820               | 28.2986643 | 46.7956607 |
| C  | 48.5027477 | 24.8309031 | 49.7104413 | C  | 45.6007064               | 29.3877089 | 46.0837197 |
| O  | 48.5483270 | 22.1870342 | 52.2908214 | H  | 46.3036292               | 30.0864985 | 45.6456682 |
| H  | 46.9800250 | 23.8901544 | 50.9386633 | C  | 45.8183783               | 25.2677360 | 43.6213732 |
| H  | 47.8019344 | 22.7714494 | 49.8710891 | N  | 46.2403416               | 26.2767453 | 42.7830411 |
| H  | 49.4582983 | 24.5590263 | 49.2286747 | H  | 46.0325981               | 26.3778322 | 41.7791972 |
| H  | 48.7528708 | 25.6667277 | 50.3733024 | C  | 47.0202607               | 27.1099976 | 43.4974139 |
| O  | 49.6763275 | 26.1616696 | 46.1164239 | H  | 47.5053005               | 27.9846359 | 43.0695905 |
| H  | 50.1095981 | 26.4071869 | 45.2359339 | N  | 47.1370710               | 26.6838716 | 44.7551975 |
| H  | 50.3348524 | 26.3346109 | 46.8490235 | C  | 46.3827284               | 25.5266668 | 44.8469460 |
| N  | 52.2112288 | 32.7373027 | 47.2909478 | H  | 46.2966025               | 24.9746898 | 45.7841160 |
| H  | 52.4818033 | 32.6393140 | 48.2681106 | Fe | 47.9886669               | 27.4924206 | 46.6050345 |
| C  | 51.2813619 | 31.7891451 | 46.6619774 | O  | 49.0741297               | 28.8972700 | 46.6573208 |
| H  | 51.6516227 | 31.5589582 | 45.6475196 | O  | 46.6461826               | 24.7245196 | 48.1426086 |
| C  | 51.2268363 | 30.4827738 | 47.4372162 | C  | 47.5532868               | 25.3591626 | 48.6573567 |
| H  | 50.8957459 | 30.6251571 | 48.4767817 | C  | 47.9697432               | 23.6299766 | 50.5598997 |
| H  | 50.1946449 | 29.6708110 | 46.9872896 | C  | 48.9037960               | 23.2489806 | 51.7381294 |
| C  | 52.4488502 | 29.5882957 | 47.3288306 | O  | 47.8632264               | 26.5959741 | 48.2980107 |
| O  | 52.6226132 | 28.7234960 | 48.2294444 | O  | 49.8851390               | 23.9865823 | 52.0104145 |
|    |            |            |            | C  | 48.4649516               | 24.8192553 | 49.7476158 |

O 48.5907338 22.2113537 52.3685364  
H 46.9777500 23.8441925 50.9920360  
H 47.8205230 22.7407764 49.9264090  
H 49.4146423 24.5615393 49.2458979  
H 48.7197200 25.6550125 50.4081714  
O 49.5508524 26.0725917 46.1947044  
H 49.9826361 26.3175522 45.3137616  
H 50.1928026 26.2997023 46.9278060  
N 52.1401079 32.6669034 47.1457585  
H 52.2301231 32.5427003 48.1512563  
C 51.2312848 31.8241551 46.3573615  
H 51.4806294 32.0170183 45.2994313  
C 51.3442863 30.2806828 46.5242919  
H 50.2470129 29.6516451 46.8473376  
H 51.3771807 29.8789103 45.5000257  
C 52.6025260 29.6800437 47.1749688  
O 52.5213722 28.8277794 48.0929237  
O 53.6517296 30.0291889 46.5825581  
C 49.7235960 32.2397318 46.4953374  
O 49.4122425 32.9522140 47.4214336  
H 52.2289568 33.6218172 46.8625312  
H 49.0476686 31.9055373 45.7082521  
H 43.5540612 30.0627755 45.5352685  
H 45.1704305 24.4477671 43.3117252

**IM4**

C 44.0874513 29.2381849 46.0418018  
N 43.6399515 28.1256406 46.7162850  
H 42.6576862 27.8638596 46.8813492  
C 44.7118010 27.4157580 47.1091757  
H 44.6666703 26.4673951 47.6431252  
N 45.8302649 28.0204776 46.7180747  
C 45.4553804 29.1602113 46.0457275

H 46.1955955 29.8197010 45.6015047  
C 45.6723631 25.0316369 43.4761199  
N 46.1221905 26.0713787 42.6930226  
H 45.9319441 26.2212301 41.6897898  
C 46.9029583 26.8535934 43.4568331  
H 47.4168712 27.7373399 43.0863325  
N 46.9886795 26.3590221 44.6926678  
C 46.2163791 25.2155146 44.7210258  
H 46.1095837 24.6248666 45.6302752  
Fe 47.7804020 27.2027851 46.4404097  
O 48.5335903 28.8424815 46.0657701  
O 46.7333109 24.7763630 48.0027597  
C 47.6199822 25.3780070 48.5914296  
C 47.9759436 23.6284287 50.4919635  
C 48.8955949 23.1991674 51.6770123  
O 47.9443327 26.6288020 48.2528548  
O 49.8449642 23.9644030 52.0037665  
C 48.4915929 24.8133293 49.6895396  
O 48.5779166 22.1227302 52.2240955  
H 46.9900740 23.8638964 50.9292397  
H 47.8043274 22.7500892 49.8494680  
H 49.4405490 24.5411067 49.1919521  
H 48.7635018 25.6380084 50.3569867  
O 49.5707904 26.0871048 46.1095770  
H 50.0280141 26.3499945 45.2453658  
H 50.1927883 26.3048224 46.8648476  
N 52.4712509 32.8678607 47.3506963  
H 52.7926762 32.7916354 48.3169543  
C 51.5875715 31.8489943 46.7887880  
H 51.9579993 31.5624676 45.7887562  
C 51.6860746 30.6488867 47.6781638  
H 51.0775881 30.6152947 48.5848741  
H 48.5464123 29.4950789 46.7819331

C 52.6775416 29.5814865 47.4354451  
O 52.7320086 28.6214003 48.2572102  
O 53.4067516 29.6912219 46.4066008  
C 50.0848146 32.2625116 46.7319117  
O 49.6393611 32.9320405 47.6415443  
H 52.4050357 33.8082077 47.0170266  
H 49.5140732 31.9331770 45.8636606  
H 43.4439458 29.9628851 45.5430259  
H 44.9882083 24.2520451 43.1411036

**TS<sub>REB</sub>**

C 44.3054809 29.4797776 46.0328910  
N 43.9806441 28.3762869 46.7883883  
H 43.0278477 28.0216291 46.9616473  
C 45.1302596 27.8253543 47.2308857  
H 45.1953027 26.9008348 47.8082347  
N 46.1831595 28.5243877 46.7959718  
C 45.6740520 29.5538975 46.0412955  
H 46.3170095 30.2648753 45.5358647  
C 45.8877629 25.3607770 43.6797994  
N 46.3388110 26.3313913 42.8120647  
H 46.1387021 26.4055311 41.8042231  
C 47.1312039 27.1704970 43.5075633  
H 47.6460891 28.0128413 43.0510916  
N 47.2288902 26.7891369 44.7804120  
C 46.4476198 25.6520905 44.9016196  
H 46.3390002 25.1351679 45.8553691  
Fe 48.1527366 27.6199291 46.5938738  
O 49.5366782 29.2744383 46.7897062  
O 46.6195845 25.1340489 48.2455605  
C 47.6469285 25.6229090 48.6942046  
C 48.0218182 23.7541232 50.4734682  
C 48.9335499 23.2573239 51.6364837

O 48.0673509 26.8371094 48.3460401  
O 49.8937600 23.9929402 52.0016485  
C 48.5749666 24.9202100 49.6658374  
O 48.5981029 22.1642585 52.1400521  
H 47.0608378 24.0413359 50.9350373  
H 47.7837548 22.8923855 49.8301767  
H 49.4419720 24.5917662 49.0638099  
H 48.9840525 25.6854897 50.3332133  
O 49.7770774 26.3812793 46.1387759  
H 50.2125570 26.5624825 45.2463864  
H 50.4487419 26.4414317 46.8758886  
N 52.1563494 32.7190449 47.3170132  
H 52.4232732 32.6261257 48.2953675  
C 51.2292079 31.7696227 46.6691794  
H 51.6295356 31.5248235 45.6703118  
C 51.2138795 30.4744282 47.4633386  
H 50.7437205 30.5056603 48.4484758  
H 48.9533022 29.8978450 47.2497873  
C 52.4130524 29.5677653 47.3320894  
O 52.6191746 28.7296855 48.2456910  
O 53.1477082 29.7367501 46.3183970  
C 49.7695888 32.2898378 46.5747534  
O 49.3351104 32.9523594 47.4933392  
H 52.2210126 33.6551918 46.9714414  
H 49.2150332 32.0189125 45.6763467  
H 43.5923820 30.1330663 45.5301277  
H 45.2494500 24.5291667 43.3813900

**PD**

C 44.0823819 29.3468597 46.0000323  
N 43.6560858 28.2673683 46.7365211  
H 42.6786324 27.9942499 46.9152024  
C 44.7436590 27.6021148 47.1646530

|    |            |            |            |   |            |            |            |
|----|------------|------------|------------|---|------------|------------|------------|
| H  | 44.7164438 | 26.6788184 | 47.7446000 | C | 51.5799620 | 30.4885998 | 47.4762106 |
| N  | 45.8546918 | 28.2018173 | 46.7365614 | H | 51.3390179 | 30.6737420 | 48.5358730 |
| C  | 45.4528826 | 29.2934830 | 46.0038824 | H | 49.8402821 | 29.5299500 | 47.4382054 |
| H  | 46.1629914 | 29.9585152 | 45.5186439 | C | 52.9132843 | 29.7142395 | 47.3738760 |
| C  | 45.5989500 | 24.9724867 | 43.4178369 | O | 53.0544191 | 28.7725737 | 48.1971266 |
| N  | 46.0573631 | 26.0175839 | 42.6510219 | O | 53.6594520 | 29.9796449 | 46.4054685 |
| H  | 45.8788741 | 26.1788393 | 41.6478806 | C | 50.0050075 | 32.2537518 | 46.6727197 |
| C  | 46.8180705 | 26.7986273 | 43.4374268 | O | 49.5918556 | 32.9155809 | 47.6045941 |
| H  | 47.3351749 | 27.6835599 | 43.0722992 | H | 52.3716441 | 33.7295850 | 46.9855912 |
| N  | 46.8829154 | 26.2992430 | 44.6716800 | H | 49.4054460 | 31.9503784 | 45.8144903 |
| C  | 46.1152732 | 25.1528745 | 44.6744628 | H | 43.4206106 | 30.0403400 | 45.4811770 |
| H  | 45.9838274 | 24.5554212 | 45.5768948 | H | 44.9124543 | 24.1995166 | 43.0724267 |
| Fe | 47.5700516 | 27.0080859 | 46.5160732 |   |            |            |            |
| O  | 50.6483023 | 29.5538763 | 46.9141448 |   |            |            |            |
| O  | 46.5554764 | 24.6395307 | 48.2298651 |   |            |            |            |
| C  | 47.5084254 | 25.2363663 | 48.7159423 |   |            |            |            |
| C  | 48.0167219 | 23.4783341 | 50.5785331 |   |            |            |            |
| C  | 48.9769492 | 23.1120797 | 51.7482219 |   |            |            |            |
| O  | 47.8306706 | 26.4671272 | 48.3433914 |   |            |            |            |
| O  | 49.8946900 | 23.9284705 | 52.0433619 |   |            |            |            |
| C  | 48.4672935 | 24.6608502 | 49.7375675 |   |            |            |            |
| O  | 48.7243947 | 22.0318524 | 52.3231243 |   |            |            |            |
| H  | 47.0354888 | 23.6952022 | 51.0353446 |   |            |            |            |
| H  | 47.8485047 | 22.5777080 | 49.9661939 |   |            |            |            |
| H  | 49.3850081 | 24.4057272 | 49.1746255 |   |            |            |            |
| H  | 48.7781634 | 25.4843611 | 50.3887722 |   |            |            |            |
| O  | 49.5852466 | 26.8809128 | 46.1552212 |   |            |            |            |
| H  | 50.0606834 | 26.8672596 | 45.2675117 |   |            |            |            |
| H  | 50.2313357 | 26.8537021 | 46.9155587 |   |            |            |            |
| N  | 52.3932070 | 32.7855495 | 47.3146876 |   |            |            |            |
| H  | 52.6850249 | 32.6994902 | 48.2887563 |   |            |            |            |
| C  | 51.5026001 | 31.8187484 | 46.6964699 |   |            |            |            |
| H  | 51.8553917 | 31.5976498 | 45.6719489 |   |            |            |            |

**Snapshot 3**

**RC2**

C 39.3395554 43.8467596 32.1884340  
N 38.0800208 44.0399036 31.6674967  
H 37.8251018 44.7287023 30.9460318  
C 37.2425299 43.1749972 32.2661132  
H 36.1788758 43.0987345 32.0515937  
N 37.9042092 42.4326631 33.1469239  
C 39.2177550 42.8384211 33.1098742  
H 39.9625806 42.3495116 33.7322080  
C 37.9804204 39.3661778 29.9099198  
N 39.2260598 39.0571140 30.4118734  
H 40.0525487 38.7392406 29.8856951  
C 39.2018343 39.2792010 31.7389543  
H 40.0436660 39.0990210 32.4027454  
N 38.0023956 39.7137473 32.1135563  
C 37.2255178 39.7722905 30.9784690  
H 36.1857506 40.0906883 31.0018556  
Fe 37.4222907 40.5531665 33.9607271  
O 38.7971848 40.5782593 34.9088888  
O 34.4044318 39.1124371 34.0149096  
C 34.4322201 40.3556342 34.0565602  
C 32.2069328 40.4139167 35.3159271  
C 30.7377003 40.8682473 35.2343768  
O 35.4978636 41.0528336 33.8269870  
O 30.0353171 40.5713715 36.2440042  
C 33.1604452 41.1437216 34.3677239  
O 30.2959535 41.4183147 34.2131135  
H 32.1903037 39.3436134 35.0575444

H 32.5376108 40.4714856 36.3635952  
H 33.4330812 42.1413717 34.7383563  
H 32.6320864 41.3050339 33.4129468  
O 36.8934399 38.7225868 34.6672934  
H 36.0393564 38.4883583 34.2284893  
H 37.6692029 38.0584198 34.4726106  
N 41.5842121 40.9151005 40.3476302  
H 40.9500748 41.5416693 40.8374715  
C 41.2381341 40.6113975 38.9577915  
H 41.8280169 39.7369331 38.6354061  
C 39.7531435 40.2164832 38.8839146  
H 39.1371549 40.9787486 39.3925107  
H 39.4245217 40.2464643 37.8330390  
C 39.3346316 38.8223671 39.4002114  
O 38.1089333 38.5726585 39.3348139  
O 40.2185140 38.0278662 39.8248175  
C 41.4754386 41.8092500 38.0069767  
O 41.3813761 42.9373154 38.4625240  
H 42.5303235 41.1788206 40.5355040  
H 41.7385353 41.6106947 36.9680242  
H 40.2276327 44.3763371 31.8435679  
H 37.6908694 39.3237513 28.8599548

**TS<sub>proR</sub>**

C 39.5780527 43.9127904 32.4939649  
N 38.2805185 44.0933722 32.0705878  
H 37.9728811 44.7247901 31.3155517  
C 37.4886205 43.2994466 32.8180553  
H 36.4103007 43.2259564 32.6952306  
N 38.2096027 42.6182968 33.7052262  
C 39.5183846 42.9922833 33.5106022  
H 40.3124492 42.5493556 34.1031904  
C 38.1580376 39.5477325 30.4519158

N 39.4142407 39.1514509 30.8579501  
 H 40.1641831 38.7532128 30.2752779  
 C 39.5302855 39.4159347 32.1736841  
 H 40.4151362 39.1687399 32.7564472  
 N 38.4127087 39.9641276 32.6453455  
 C 37.5438167 40.0487439 31.5732553  
 H 36.5369558 40.4467322 31.6726635  
 Fe 37.7907600 40.6849381 34.6303582  
 O 38.8516741 40.8563001 36.0576591  
 O 34.8068058 39.2282755 34.2725025  
 C 34.7800499 40.4624764 34.4454913  
 C 32.3934303 40.4047589 35.3376052  
 C 30.9429624 40.8832863 35.2501962  
 O 35.8472093 41.1899801 34.5415437  
 O 30.1868585 40.5821070 36.2165154  
 C 33.4310176 41.1772469 34.5143870  
 O 30.5112926 41.4838287 34.2455261  
 H 32.3804773 39.3580004 34.9934696  
 H 32.6649276 40.3708461 36.4031432  
 H 33.5692072 42.2009235 34.8843242  
 H 33.0595564 41.2661533 33.4789053  
 O 37.2596325 38.7399832 34.9761112  
 H 36.3870020 38.6035569 34.5245711  
 H 37.9820293 38.0540529 34.7012059  
 N 41.4348589 41.0912557 40.2649730  
 H 40.9324534 41.9343086 40.5521977  
 C 41.1619338 40.7550291 38.8261307  
 H 41.6896875 39.8165755 38.5901376  
 C 39.6749649 40.5212848 38.5820550  
 H 39.0542705 41.3439584 38.9660069  
 H 39.2716929 40.6517184 37.2047885  
 C 39.0553602 39.1568154 38.8747411  
 O 37.8093288 39.1557894 39.0113919

O 39.8040016 38.1441475 38.9334542  
 C 41.5972294 41.9107430 37.8918848  
 O 41.5890732 43.0435857 38.3430794  
 H 42.3945016 41.2380200 40.5048015  
 H 41.8903735 41.6763668 36.8685566  
 H 40.4392419 44.4165168 32.0550125  
 H 37.7740794 39.4346279 29.4380867

**TS<sub>pros</sub>**

C 39.5821183 43.8676270 32.4568425  
 N 38.2775091 44.0711837 32.0668910  
 H 37.9622721 44.7212345 31.3309575  
 C 37.4954446 43.2594732 32.8075866  
 H 36.4139561 43.1983236 32.7089544  
 N 38.2309614 42.5455597 33.6552894  
 C 39.5372172 42.9136724 33.4430382  
 H 40.3400929 42.4360879 33.9947399  
 C 38.1010361 39.5175333 30.3684095  
 N 39.3817375 39.1743470 30.7395648  
 H 40.1352189 38.8136499 30.1377183  
 C 39.5180522 39.4299979 32.0532164  
 H 40.4387485 39.2298323 32.5930789  
 N 38.3880134 39.9154038 32.5643619  
 C 37.4906873 39.9735325 31.5123437  
 H 36.4685386 40.3230037 31.6389923  
 Fe 37.7860949 40.6410371 34.6030590  
 O 38.7408468 40.7700769 36.1022437  
 O 34.7906466 39.2218217 34.1769491  
 C 34.7791445 40.4482130 34.4048583  
 C 32.4079687 40.4115272 35.3311871  
 C 30.9627892 40.9044332 35.2581538  
 O 35.8532800 41.1559945 34.5490651  
 O 30.2138633 40.5975407 36.2297738  
 C 33.4410275 41.1786642 34.4964075

|   |            |            |            |    |            |            |            |
|---|------------|------------|------------|----|------------|------------|------------|
| O | 30.5276014 | 41.5167996 | 34.2635326 | H  | 39.9763382 | 42.2774291 | 33.8923865 |
| H | 32.3785689 | 39.3667785 | 34.9834445 | C  | 37.9596171 | 39.3892488 | 30.0358071 |
| H | 32.6944499 | 40.3677643 | 36.3928656 | N  | 39.1982593 | 39.0613319 | 30.5417590 |
| H | 33.5994046 | 42.1969958 | 34.8732896 | H  | 40.0210547 | 38.7313398 | 30.0167085 |
| H | 33.0549946 | 41.2747940 | 33.4673353 | C  | 39.1745411 | 39.2817918 | 31.8691434 |
| O | 37.2123948 | 38.6397542 | 34.8254166 | H  | 40.0147272 | 39.0730714 | 32.5278482 |
| H | 36.3658255 | 38.5685950 | 34.3074457 | N  | 37.9810614 | 39.7393354 | 32.2449082 |
| H | 37.9693935 | 38.0195601 | 34.5298704 | C  | 37.2091778 | 39.8086792 | 31.1030956 |
| N | 41.5917500 | 41.0376805 | 40.0093799 | H  | 36.1731854 | 40.1406875 | 31.1204713 |
| H | 40.9499773 | 41.7476096 | 40.3564800 | Fe | 37.2283001 | 40.4751029 | 34.0970417 |
| C | 41.4517664 | 40.6719079 | 38.5819339 | O  | 38.2122744 | 40.4959463 | 35.6876508 |
| H | 42.3087782 | 40.0220133 | 38.3428922 | O  | 34.2129730 | 39.0614126 | 33.9923894 |
| C | 40.1977091 | 39.8295510 | 38.1562895 | C  | 34.2431260 | 40.2953960 | 34.1330368 |
| H | 39.3275517 | 40.4145865 | 37.2268602 | C  | 32.0171431 | 40.3781584 | 35.3979000 |
| H | 40.5806960 | 39.0888484 | 37.4346620 | C  | 30.5318870 | 40.8297320 | 35.2528930 |
| C | 39.4577152 | 38.9658081 | 39.1926903 | O  | 35.3525227 | 40.9783219 | 34.0156097 |
| O | 38.2143520 | 39.0093059 | 39.2640926 | O  | 29.8154911 | 40.6112290 | 36.2595876 |
| O | 40.1952569 | 38.1632328 | 39.8437510 | C  | 32.9801267 | 41.0770452 | 34.4316941 |
| C | 41.5851204 | 41.9203192 | 37.6663904 | O  | 30.1720263 | 41.2996965 | 34.1557579 |
| O | 41.4317136 | 43.0220347 | 38.1591540 | H  | 32.0102974 | 39.2966728 | 35.1851611 |
| H | 42.5179917 | 41.2256773 | 40.3360374 | H  | 32.3201792 | 40.4871113 | 36.4497012 |
| H | 41.8651413 | 41.7724462 | 36.6234197 | H  | 33.2430465 | 42.0902753 | 34.7655542 |
| H | 40.4376747 | 44.3851017 | 32.0228961 | H  | 32.4234026 | 41.1928775 | 33.4854506 |
| H | 37.7225946 | 39.4203587 | 29.3508608 | O  | 36.6897806 | 38.5407223 | 34.5890888 |
|   |            |            |            | H  | 35.8308599 | 38.3450962 | 34.1429046 |
|   |            | <b>IM4</b> |            | H  | 37.4760081 | 37.9017046 | 34.3670286 |
| C | 39.3563291 | 43.7662990 | 32.3485975 | N  | 41.4533216 | 41.0382060 | 40.4911894 |
| N | 38.0941323 | 43.9956180 | 31.8519791 | H  | 40.9486739 | 41.8804377 | 40.7792167 |
| H | 37.8460783 | 44.6859137 | 31.1276141 | C  | 41.1134167 | 40.6643952 | 39.0905780 |
| C | 37.2438268 | 43.1600448 | 32.4755800 | H  | 41.6265452 | 39.7230162 | 38.8381826 |
| H | 36.1751324 | 43.1143426 | 32.2746843 | C  | 39.6365235 | 40.4463583 | 39.0463124 |
| N | 37.8941970 | 42.3997634 | 33.3521540 | H  | 39.0003790 | 41.3268907 | 39.1699982 |
| C | 39.2200575 | 42.7667553 | 33.2816493 | H  | 37.8171376 | 39.9106412 | 36.3629952 |



C 38.9376971 39.1440956 38.8707208  
 O 37.7020197 39.2439774 38.6311150  
 O 39.5865621 38.0653313 38.9685404  
 C 41.4687422 41.8210612 38.0964742  
 O 41.4454853 42.9528998 38.5435601  
 H 42.4221392 41.2225083 40.6567087  
 H 41.7310697 41.5890614 37.0642792  
 H 40.2430074 44.2892978 31.9903517  
 H 37.6735058 39.3325145 28.9855749

**TS<sub>REB</sub>**

C 39.5876839 43.9000300 32.5274317  
 N 38.2743970 44.1063327 32.1686677  
 H 37.9477543 44.7318710 31.4158264  
 C 37.5039166 43.3378148 32.9624628  
 H 36.4198941 43.2699556 32.8928633  
 N 38.2551539 42.6489823 33.8248976  
 C 39.5607903 42.9862892 33.5492429  
 H 40.3802592 42.5186253 34.0836795  
 C 38.0990879 39.5307037 30.3878060  
 N 39.3489548 39.1342966 30.8145454  
 H 40.1090738 38.7395276 30.2438956  
 C 39.4429498 39.4031304 32.1304185  
 H 40.3183479 39.1575049 32.7276892  
 N 38.3187477 39.9546184 32.5837182  
 C 37.4677789 40.0360337 31.4974993  
 H 36.4605654 40.4371269 31.5814751  
 Fe 37.7199611 40.6918892 34.5402416  
 O 38.7912769 40.6470088 36.6174210  
 O 34.8087736 39.2004424 34.3990785  
 C 34.7127091 40.4502300 34.4456877  
 C 32.3176788 40.3773477 35.3686612  
 C 30.8376215 40.8341435 35.2346373

O 35.7483268 41.2217301 34.4538224  
 O 30.1239067 40.5847789 36.2429452  
 C 33.3326280 41.1020899 34.4743520  
 O 30.4486243 41.3356996 34.1640637  
 H 32.3178075 39.3058574 35.1106301  
 H 32.5936587 40.4334170 36.4319488  
 H 33.4383969 42.1591274 34.7548309  
 H 32.9325330 41.0924783 33.4462355  
 O 37.2464280 38.8255045 35.1444649  
 H 36.3197837 38.7179079 34.7585327  
 H 37.9118138 38.1095279 34.7943496  
 N 41.4062201 41.1633781 40.2035766  
 H 40.9212021 42.0186252 40.4827711  
 C 41.1191879 40.8097134 38.7701947  
 H 41.6526004 39.8753817 38.5323603  
 C 39.6301647 40.5404501 38.6379302  
 H 38.9809518 41.3745943 38.9099318  
 H 38.1005690 40.0651400 36.9919161  
 C 39.0338866 39.1650846 38.8554389  
 O 37.7774661 39.1410627 38.8905258  
 O 39.7984027 38.1729193 38.9397025  
 C 41.5288343 41.9730736 37.8267939  
 O 41.5113471 43.0985273 38.2874974  
 H 42.3660438 41.2804462 40.4585376  
 H 41.8337018 41.7413834 36.8062834  
 H 40.4400737 44.4008636 32.0684506  
 H 37.7374115 39.4201850 29.3655330

**PD**

C 39.5885016 43.8842380 32.2362364  
 N 38.2990524 44.1838135 31.8637173  
 H 38.0147760 44.9131579 31.1930595  
 C 37.4783674 43.3239072 32.4893068

|    |            |            |            |   |            |            |            |
|----|------------|------------|------------|---|------------|------------|------------|
| H  | 36.3952785 | 43.3229107 | 32.3799642 | C | 39.8486658 | 40.2549232 | 38.6855524 |
| N  | 38.1779108 | 42.4796125 | 33.2461536 | H | 39.2607112 | 40.8533873 | 39.4120015 |
| C  | 39.5041445 | 42.8161185 | 33.0932412 | H | 38.7670558 | 39.5381823 | 37.3406980 |
| H  | 40.2919899 | 42.2529057 | 33.5892683 | C | 39.6806743 | 38.7514981 | 39.0730102 |
| C  | 38.0049440 | 39.3257026 | 29.8072187 | O | 38.7827421 | 38.1849359 | 38.4044029 |
| N  | 39.2547224 | 39.0470350 | 30.3126825 | O | 40.4021112 | 38.2162591 | 39.9416156 |
| H  | 40.0918595 | 38.7449705 | 29.7927810 | C | 41.5400778 | 42.0120943 | 37.8392352 |
| C  | 39.2219640 | 39.2647275 | 31.6379727 | O | 41.4892083 | 43.1124222 | 38.3564176 |
| H  | 40.0744810 | 39.1080582 | 32.2949884 | H | 42.5368167 | 41.2615071 | 40.4241419 |
| N  | 38.0080892 | 39.6689963 | 32.0133406 | H | 41.7904628 | 41.8636527 | 36.7888359 |
| C  | 37.2357716 | 39.7094852 | 30.8719830 | H | 40.4604853 | 44.4035293 | 31.8386849 |
| H  | 36.1878130 | 40.0024761 | 30.8836106 | H | 37.7222623 | 39.2996513 | 28.7548506 |
| Fe | 37.4101494 | 40.6144718 | 33.7493730 |   |            |            |            |
| O  | 39.2830053 | 40.3873410 | 37.3876451 |   |            |            |            |
| O  | 34.8889330 | 39.1350226 | 34.7053301 |   |            |            |            |
| C  | 34.6590760 | 40.3584748 | 34.5910380 |   |            |            |            |
| C  | 32.2386659 | 40.2644449 | 35.5430052 |   |            |            |            |
| C  | 30.7545172 | 40.6919488 | 35.2636205 |   |            |            |            |
| O  | 35.6380573 | 41.2035570 | 34.4112918 |   |            |            |            |
| O  | 29.9736145 | 40.6207334 | 36.2369754 |   |            |            |            |
| C  | 33.2571991 | 40.9295277 | 34.6156319 |   |            |            |            |
| O  | 30.4853427 | 41.0098561 | 34.0832451 |   |            |            |            |
| H  | 32.2683504 | 39.1721098 | 35.3916597 |   |            |            |            |
| H  | 32.4572041 | 40.4367323 | 36.6087016 |   |            |            |            |
| H  | 33.3260082 | 42.0119457 | 34.7976083 |   |            |            |            |
| H  | 32.8452877 | 40.8326955 | 33.5928803 |   |            |            |            |
| O  | 37.5411788 | 39.0548414 | 35.0981118 |   |            |            |            |
| H  | 36.5946198 | 38.7505216 | 35.0205742 |   |            |            |            |
| H  | 38.1934777 | 38.3226259 | 34.8035661 |   |            |            |            |
| N  | 41.5900990 | 41.0761464 | 40.1608195 |   |            |            |            |
| H  | 40.9818534 | 41.7778843 | 40.5775005 |   |            |            |            |
| C  | 41.3123912 | 40.7750195 | 38.7562659 |   |            |            |            |
| H  | 41.9800795 | 39.9567254 | 38.4355884 |   |            |            |            |

**Snapshot 4**

**RC2**

C 39.8386928 34.1284118 34.5423127  
N 38.7149822 33.3986528 34.2250253  
H 38.1561727 33.4939198 33.3648487  
C 38.4962992 32.5128315 35.2062726  
H 37.6813755 31.7934013 35.2249834  
N 39.4346834 32.6376487 36.1445487  
C 40.2836559 33.6447426 35.7429145  
H 41.1507196 33.9201115 36.3369598  
C 41.1312127 29.1624341 33.8679674  
N 42.3354877 29.7298254 34.2137918  
H 43.2132002 29.7028529 33.6690098  
C 42.1800055 30.3366334 35.4002865  
H 42.9753154 30.8552863 35.9297371  
N 40.9297296 30.1816824 35.8331043  
C 40.2584988 29.4459575 34.8847199  
H 39.2125857 29.1695861 34.9953915  
Fe 40.0339015 31.1889947 37.4258499  
O 41.3138137 32.0931218 37.8371985  
O 38.3896917 28.4978256 38.3588919  
C 37.7123369 29.5171764 38.1363705  
C 35.5963935 28.3356264 39.0230461  
C 34.3050960 28.4990106 39.8907316  
O 38.1997164 30.5459815 37.4970844  
O 34.4634893 29.0059375 41.0368147  
C 36.3003801 29.6496406 38.6787324  
O 33.2547683 28.0874896 39.3754070  
H 35.3313506 27.7776223 38.1127922

H 36.2918707 27.7148201 39.6107714  
H 36.4151758 30.2304387 39.6120025  
H 35.7064048 30.2862361 38.0042665  
O 40.5650158 29.7909391 38.7031560  
H 39.9446808 29.0251817 38.5285088  
H 41.5798396 29.5387031 38.5573279  
N 42.7255838 35.5409669 42.9944312  
H 41.9743481 35.4718901 43.6846574  
C 42.6642096 34.7957259 41.7421961  
H 43.6486086 34.3286120 41.5493735  
C 41.6421176 33.6680871 41.8947352  
H 40.6906510 34.0917831 42.2516567  
H 41.4234537 33.2361190 40.9022698  
C 42.0459601 32.4746647 42.7686495  
O 41.0872381 31.7350865 43.1312308  
O 43.2524892 32.2476664 43.0057714  
C 42.2333619 35.6266483 40.5101350  
O 41.4491974 36.5518417 40.6629624  
H 43.1714985 36.4359932 42.9867157  
H 42.6802118 35.3506855 39.5550245  
H 40.2675982 34.9025944 33.9061149  
H 40.9298075 28.6471197 32.9288438

**TS<sub>proR</sub>**

C 40.0103638 34.3080132 34.7178635  
N 38.8699718 33.5776380 34.4757268  
H 38.3063829 33.6039911 33.6129761  
C 38.6360688 32.8110605 35.5572273  
H 37.8050447 32.1156454 35.6457450  
N 39.5693211 33.0122469 36.4837779  
C 40.4366462 33.9469914 35.9722687  
H 41.3004011 34.2812871 36.5387315  
C 41.1839919 29.5481959 34.2770888

|    |            |            |            |    |                          |            |            |
|----|------------|------------|------------|----|--------------------------|------------|------------|
| N  | 42.4345134 | 30.0675847 | 34.5209563 | O  | 43.0905954               | 32.2797764 | 42.6486013 |
| H  | 43.2821066 | 29.9435303 | 33.9444316 | C  | 42.1645904               | 35.7017970 | 40.2051279 |
| C  | 42.3777923 | 30.7580579 | 35.6762293 | O  | 41.4048227               | 36.6423238 | 40.3649042 |
| H  | 43.2451494 | 31.2421999 | 36.1191189 | H  | 43.0653315               | 36.4263791 | 42.7655858 |
| N  | 41.1528986 | 30.7152826 | 36.1948359 | H  | 42.6428629               | 35.4403491 | 39.2612177 |
| C  | 40.3952892 | 29.9532771 | 35.3267797 | H  | 40.4239550               | 35.0364194 | 34.0204162 |
| H  | 39.3486683 | 29.7276358 | 35.5182993 | H  | 40.9351414               | 28.9371315 | 33.4094830 |
| Fe | 40.1460839 | 31.6024135 | 37.9879865 |    |                          |            |            |
| O  | 40.9586232 | 32.6221165 | 39.1625201 |    | <b>TS<sub>pros</sub></b> |            |            |
| O  | 38.3522494 | 28.7798205 | 38.3250829 | C  | 40.0132195               | 34.3049315 | 34.7034319 |
| C  | 37.7373132 | 29.8595729 | 38.4048695 | N  | 38.8599985               | 33.5931851 | 34.4652412 |
| C  | 35.5865355 | 28.5815268 | 39.0537498 | H  | 38.2923655               | 33.6302990 | 33.6056152 |
| C  | 34.3565283 | 28.5950287 | 40.0053428 | C  | 38.6216340               | 32.8234866 | 35.5425123 |
| O  | 38.2671181 | 30.9975514 | 38.0721099 | H  | 37.7821861               | 32.1385078 | 35.6338746 |
| O  | 34.5345515 | 29.0091270 | 41.1795878 | N  | 39.5647912               | 33.0075801 | 36.4623844 |
| C  | 36.3330054 | 29.9128494 | 38.9796181 | C  | 40.4449642               | 33.9300696 | 35.9513634 |
| O  | 33.2949362 | 28.1564711 | 39.5206861 | H  | 41.3251882               | 34.2350309 | 36.5090942 |
| H  | 35.2574397 | 28.2427733 | 38.0622782 | C  | 41.1486952               | 29.5076309 | 34.2573766 |
| H  | 36.2731987 | 27.8136457 | 39.4482484 | N  | 42.3872176               | 30.0659673 | 34.4717324 |
| H  | 36.4725940 | 30.2844681 | 40.0079427 | H  | 43.2293613               | 29.9556742 | 33.8847399 |
| H  | 35.7571189 | 30.6942337 | 38.4598109 | C  | 42.3319394               | 30.7689227 | 35.6180493 |
| O  | 40.6878451 | 29.8042636 | 38.8202258 | H  | 43.1917413               | 31.2960349 | 36.0226732 |
| H  | 40.0281362 | 29.1467240 | 38.4775102 | N  | 41.1192116               | 30.6935631 | 36.1647829 |
| H  | 41.6692743 | 29.5245810 | 38.6002774 | C  | 40.3681458               | 29.8999084 | 35.3185664 |
| N  | 42.5633213 | 35.5637980 | 42.7030464 | H  | 39.3317785               | 29.6466147 | 35.5313275 |
| H  | 41.8120774 | 35.4805130 | 43.3866784 | Fe | 40.1025224               | 31.6186143 | 37.9651368 |
| C  | 42.5312994 | 34.8217382 | 41.4301538 | O  | 40.7794961               | 32.6947953 | 39.1831320 |
| H  | 43.5191450 | 34.3528993 | 41.2699546 | O  | 38.4053289               | 28.7803569 | 38.3762050 |
| C  | 41.5083833 | 33.6945542 | 41.5158645 | C  | 37.7497729               | 29.8380645 | 38.4184602 |
| H  | 40.4956274 | 34.0764970 | 41.7145931 | C  | 35.6241442               | 28.5186641 | 39.0799150 |
| H  | 41.2522024 | 33.1333577 | 40.3286830 | C  | 34.3668650               | 28.5360454 | 40.0014531 |
| C  | 41.8827643 | 32.5096657 | 42.4113102 | O  | 38.2501935               | 30.9834626 | 38.0563961 |
| O  | 40.9136733 | 31.8357957 | 42.8594217 | O  | 34.5271307               | 28.9985689 | 41.1653195 |
|    |            |            |            | C  | 36.3394899               | 29.8641665 | 38.9744706 |

O 33.3279276 28.0623961 39.5123793  
H 35.3270549 28.1366907 38.0935590  
H 36.3234025 27.7859386 39.5174170  
H 36.4547255 30.2643885 39.9953434  
H 35.7491423 30.6190207 38.4315100  
O 40.7238450 29.8560313 38.8436012  
H 40.0717836 29.1805108 38.5173221  
H 41.6998251 29.6113466 38.5974320  
N 42.5939106 35.5233330 42.5870691  
H 41.7587534 35.4458509 43.1632407  
C 42.7337542 34.8398720 41.2955612  
H 43.8231156 34.7673086 41.1098925  
C 42.2406797 33.3745153 41.2032138  
H 41.2670338 33.1297911 40.3548213  
H 42.9902439 32.8438587 40.6042294  
C 42.1035666 32.5098457 42.4681139  
O 41.0050605 32.0387766 42.8267984  
O 43.2169966 32.2472210 42.9939182  
C 42.1957677 35.6771652 40.0820620  
O 41.4372255 36.5982435 40.3134965  
H 43.0828773 36.3886398 42.6971929  
H 42.5988045 35.4434529 39.0966656  
H 40.4297237 35.0344764 34.0089144  
H 40.9027547 28.9021834 33.3850161

**IM4**

C 39.8834129 34.1234588 34.5706088  
N 38.7697277 33.4065422 34.2049446  
H 38.2319517 33.5168292 33.3347005  
C 38.5128605 32.5113704 35.1714406  
H 37.6874864 31.8035100 35.1429466  
N 39.4076849 32.6162883 36.1463961  
C 40.2755978 33.6218250 35.7872988

H 41.1088331 33.9004043 36.4282512  
C 41.1604329 29.2453064 33.9665336  
N 42.3741673 29.8068265 34.2859343  
H 43.2438439 29.7628932 33.7292039  
C 42.2474906 30.4178666 35.4754975  
H 43.0691692 30.9169482 35.9840209  
N 41.0061522 30.2784054 35.9379062  
C 40.3131739 29.5409614 35.0015788  
H 39.2695727 29.2645981 35.1358276  
Fe 39.9651698 31.1210616 37.5742087  
O 40.8180986 32.3260568 38.6579968  
O 38.1937819 28.3929259 38.2426020  
C 37.5947451 29.4780433 38.2404521  
C 35.4412381 28.3614102 39.1302459  
C 34.2449004 28.5454123 40.1121139  
O 38.1250138 30.5708047 37.7469824  
O 34.5131815 29.0827824 41.2253899  
C 36.2361529 29.6413338 38.8888461  
O 33.1458477 28.1275075 39.7231170  
H 35.0580475 27.9359297 38.1913648  
H 36.1120112 27.6128936 39.5856707  
H 36.4508048 30.0934068 39.8739920  
H 35.6600970 30.4022822 38.3389020  
O 40.5635831 29.4480479 38.6368925  
H 39.9755761 28.7128783 38.3450872  
H 41.5783401 29.2615554 38.4674417  
N 42.7389146 35.5687686 43.0427095  
H 42.0094725 35.4898675 43.7570985  
C 42.6644590 34.7703039 41.8160530  
H 43.6353565 34.2702916 41.6453000  
C 41.6270490 33.7263951 42.0613596  
H 40.5809855 34.0099137 41.9159742  
H 40.3181113 32.8942794 39.2625756

|   |            |            |            |   |            |            |            |
|---|------------|------------|------------|---|------------|------------|------------|
| C | 41.9224433 | 32.4322796 | 42.7132665 | O | 38.3051218 | 31.1117403 | 38.1543549 |
| O | 40.9186687 | 31.7016352 | 42.9652807 | O | 34.5691907 | 29.0872964 | 41.1696463 |
| O | 43.1185692 | 32.1306444 | 42.9751647 | C | 36.3878549 | 29.9753261 | 39.0492641 |
| C | 42.2388770 | 35.5695467 | 40.5475587 | O | 33.3778497 | 28.0715412 | 39.5559931 |
| O | 41.4257052 | 36.4705882 | 40.6773132 | H | 35.2904896 | 28.3658360 | 38.0469088 |
| H | 43.1676001 | 36.4715129 | 43.0073103 | H | 36.3240105 | 27.8529638 | 39.3895846 |
| H | 42.7116108 | 35.2947109 | 39.6046620 | H | 36.4923545 | 30.2785308 | 40.1049869 |
| H | 40.3222517 | 34.9025521 | 33.9473108 | H | 35.8210861 | 30.7811747 | 38.5592893 |
| H | 40.9442071 | 28.7078775 | 33.0432336 | O | 40.7856637 | 30.0086023 | 38.9427933 |

**TS<sub>REB</sub>**

|    |            |            |            |   |            |            |            |
|----|------------|------------|------------|---|------------|------------|------------|
| C  | 40.0501344 | 34.3886947 | 34.6881877 | N | 42.5436734 | 35.5631523 | 42.6772444 |
| N  | 38.8817772 | 33.6833755 | 34.5188806 | H | 41.7926287 | 35.4870334 | 43.3627066 |
| H  | 38.2945586 | 33.6851333 | 33.6713278 | C | 42.4996265 | 34.8150226 | 41.4009805 |
| C  | 38.6683808 | 32.9709170 | 35.6421712 | H | 43.4775757 | 34.3257570 | 41.2432988 |
| H  | 37.8256689 | 32.3002841 | 35.7930693 | C | 41.4621453 | 33.7281480 | 41.5581151 |
| N  | 39.6417963 | 33.1819356 | 36.5266539 | H | 40.4281713 | 34.0750471 | 41.6149985 |
| C  | 40.5142333 | 34.0642388 | 35.9375041 | H | 40.5621433 | 32.0216559 | 40.3581570 |
| H  | 41.4191917 | 34.3886158 | 36.4393672 | C | 41.8054795 | 32.4977418 | 42.3618781 |
| C  | 41.1819945 | 29.6109766 | 34.3089033 | O | 40.8161321 | 31.7778656 | 42.6968376 |
| N  | 42.4452721 | 30.1000992 | 34.5505713 | O | 43.0013179 | 32.2524454 | 42.6390129 |
| H  | 43.2898385 | 29.9516848 | 33.9759299 | C | 42.1354862 | 35.6987299 | 40.1753489 |
| C  | 42.4030554 | 30.8064082 | 35.6968181 | O | 41.3755230 | 36.6362807 | 40.3441938 |
| H  | 43.2828479 | 31.2727144 | 36.1344701 | H | 43.0521166 | 36.4217830 | 42.7421325 |
| N  | 41.1759891 | 30.8057182 | 36.2130533 | H | 42.6225711 | 35.4486789 | 39.2328581 |
| C  | 40.4015651 | 30.0537175 | 35.3502706 | H | 40.4550462 | 35.0952445 | 33.9636878 |
| H  | 39.3477347 | 29.8622855 | 35.5391847 | H | 40.9280903 | 28.9849768 | 33.4534952 |
| Fe | 40.1911602 | 31.7258719 | 37.9933480 |   |            |            |            |

**PD**

|   |            |            |            |   |            |            |            |
|---|------------|------------|------------|---|------------|------------|------------|
| O | 40.9356413 | 32.6648507 | 39.7288649 | C | 40.0610235 | 34.3898806 | 34.4718947 |
| O | 38.4900231 | 28.9225131 | 38.5433060 | N | 38.8802604 | 33.7099918 | 34.2918261 |
| C | 37.8117465 | 29.9724301 | 38.5287884 | H | 38.2660020 | 33.7697366 | 33.4671927 |
| C | 35.6345487 | 28.6464110 | 39.0519257 | C | 38.7080031 | 32.9019197 | 35.3522598 |
| C | 34.3999562 | 28.6063205 | 40.0109853 |   |            |            |            |

|    |            |            |            |   |            |            |            |
|----|------------|------------|------------|---|------------|------------|------------|
| H  | 37.8618096 | 32.2312283 | 35.4861385 | C | 41.7420254 | 33.5789825 | 41.6928946 |
| N  | 39.7246956 | 33.0256143 | 36.2027983 | H | 40.7172045 | 33.9357248 | 41.9006637 |
| C  | 40.5840915 | 33.9514846 | 35.6605059 | H | 41.2383375 | 32.1070241 | 40.4500317 |
| H  | 41.5213776 | 34.2146541 | 36.1433703 | C | 42.1419057 | 32.5086637 | 42.7366715 |
| C  | 41.1639888 | 29.2318561 | 33.9019870 | O | 41.1919508 | 31.7610231 | 43.1111698 |
| N  | 42.3923106 | 29.7959999 | 34.1511149 | O | 43.3441802 | 32.3526221 | 43.0235961 |
| H  | 43.2409962 | 29.7280481 | 33.5682836 | C | 42.2175733 | 35.6620430 | 40.3625750 |
| C  | 42.3131001 | 30.4559548 | 35.3154103 | O | 41.3957012 | 36.5442235 | 40.5439230 |
| H  | 43.1495069 | 30.9955492 | 35.7498202 | H | 43.1243469 | 36.4195803 | 42.8834650 |
| N  | 41.0955082 | 30.3408739 | 35.8386448 | H | 42.6996197 | 35.4647137 | 39.4050999 |
| C  | 40.3617219 | 29.5744364 | 34.9599674 | H | 40.4615732 | 35.1139003 | 33.7623726 |
| H  | 39.3181894 | 29.3259767 | 35.1416142 | H | 40.9174017 | 28.6942920 | 32.9864075 |
| Fe | 40.2594319 | 31.4163153 | 37.4157531 |   |            |            |            |
| O  | 41.7938014 | 32.9091488 | 40.4280741 |   |            |            |            |
| O  | 38.7400548 | 29.1440264 | 39.0551915 |   |            |            |            |
| C  | 37.9264966 | 29.9948409 | 38.5936853 |   |            |            |            |
| C  | 35.7919499 | 28.5798717 | 39.0834437 |   |            |            |            |
| C  | 34.4878337 | 28.5506353 | 39.9499913 |   |            |            |            |
| O  | 38.3059592 | 30.9443149 | 37.8278380 |   |            |            |            |
| O  | 34.5608179 | 29.0938085 | 41.0908770 |   |            |            |            |
| C  | 36.4803204 | 29.9476338 | 39.0474231 |   |            |            |            |
| O  | 33.5149813 | 27.9687318 | 39.4457249 |   |            |            |            |
| H  | 35.5415388 | 28.2183048 | 38.0754299 |   |            |            |            |
| H  | 36.4894200 | 27.8524562 | 39.5336504 |   |            |            |            |
| H  | 36.5136689 | 30.2823283 | 40.0976300 |   |            |            |            |
| H  | 35.8954883 | 30.6881574 | 38.4834139 |   |            |            |            |
| O  | 40.8799395 | 30.4612476 | 39.1494300 |   |            |            |            |
| H  | 40.1223770 | 29.7639236 | 39.1643827 |   |            |            |            |
| H  | 41.7679407 | 30.0201642 | 38.8828107 |   |            |            |            |
| N  | 42.6554823 | 35.5370146 | 42.8486043 |   |            |            |            |
| H  | 41.9050545 | 35.4425732 | 43.5345786 |   |            |            |            |
| C  | 42.6650577 | 34.8045594 | 41.5889658 |   |            |            |            |
| H  | 43.6821212 | 34.4040821 | 41.4082491 |   |            |            |            |

**Snapshot 5**

**RC2**

|    |            |            |            |
|----|------------|------------|------------|
| C  | 46.3250428 | 46.2317434 | 27.0677033 |
| N  | 45.6999150 | 46.8497513 | 26.0092328 |
| H  | 46.0903486 | 46.9827679 | 25.0664889 |
| C  | 44.4789108 | 47.2380553 | 26.4236389 |
| H  | 43.7616554 | 47.7475199 | 25.7842433 |
| N  | 44.2832170 | 46.9019838 | 27.6919316 |
| C  | 45.4301549 | 46.2720312 | 28.1124139 |
| H  | 45.5190215 | 45.8933025 | 29.1283979 |
| C  | 42.1500092 | 43.5780673 | 25.7301433 |
| N  | 42.6694476 | 42.8223363 | 26.7583658 |
| H  | 42.9800181 | 41.8418798 | 26.7175011 |
| C  | 42.7246999 | 43.5998334 | 27.8565831 |
| H  | 43.0641956 | 43.2476683 | 28.8281193 |
| N  | 42.2696963 | 44.8195227 | 27.5894720 |
| C  | 41.9005237 | 44.8185230 | 26.2596666 |
| H  | 41.4544806 | 45.6921880 | 25.7875734 |
| Fe | 42.3790773 | 46.6548816 | 28.7285747 |
| O  | 42.8656377 | 46.7259518 | 30.3568858 |
| O  | 39.9709385 | 47.5993544 | 26.7899086 |
| C  | 40.6463659 | 48.5370296 | 27.2263943 |
| C  | 38.7881599 | 50.1546079 | 26.5328264 |
| C  | 38.4104568 | 51.5809005 | 26.2694900 |
| O  | 41.7072093 | 48.4115951 | 27.9574015 |
| O  | 38.7443346 | 52.2072921 | 25.2326342 |
| C  | 40.2658272 | 49.9878001 | 26.9126093 |
| O  | 37.7351797 | 52.2604546 | 27.0912179 |

|   |            |            |            |
|---|------------|------------|------------|
| H | 38.5722181 | 49.5620927 | 25.6294075 |
| H | 38.1472232 | 49.7913740 | 27.3493393 |
| H | 40.5167348 | 50.5975901 | 27.7910915 |
| H | 40.9192669 | 50.3430200 | 26.0965671 |
| O | 40.2643627 | 46.1709467 | 29.1299899 |
| H | 39.9365890 | 46.1030217 | 28.2114093 |
| H | 40.3566509 | 45.2003463 | 29.5222179 |
| N | 44.6604645 | 47.9662524 | 35.8884557 |
| H | 44.6083044 | 48.9786868 | 35.8032012 |
| C | 44.4325963 | 47.1893389 | 34.6633464 |
| H | 44.1932198 | 46.1533413 | 34.9627892 |
| C | 43.1940646 | 47.7489528 | 33.9496426 |
| H | 43.2509073 | 48.8477753 | 33.8941680 |
| H | 43.1693806 | 47.4075562 | 32.8894001 |
| C | 41.8396107 | 47.3582575 | 34.5499877 |
| O | 40.8450171 | 47.9292704 | 34.0365700 |
| O | 41.8036620 | 46.4791817 | 35.4478013 |
| C | 45.5955693 | 47.2064809 | 33.6496935 |
| O | 46.3558803 | 48.1616545 | 33.6276767 |
| H | 45.4238872 | 47.6990090 | 36.4764509 |
| H | 45.6547729 | 46.3397445 | 32.9914161 |
| H | 47.3128459 | 45.7777113 | 26.9891790 |
| H | 41.9971412 | 43.2270989 | 24.7095950 |

**TS<sub>proR</sub>**

|   |            |            |            |
|---|------------|------------|------------|
| C | 46.5789371 | 46.2174903 | 27.3388731 |
| N | 45.9268298 | 47.0014098 | 26.4143548 |
| H | 46.2389045 | 47.1829110 | 25.4489825 |
| C | 44.7924808 | 47.4514605 | 26.9885032 |
| H | 44.0706022 | 48.0905313 | 26.4867773 |
| N | 44.6774310 | 46.9949316 | 28.2335012 |
| C | 45.7892874 | 46.2200007 | 28.4623118 |
| H | 45.9337155 | 45.6998137 | 29.4030762 |



|    |            |            |            |    |                          |            |            |
|----|------------|------------|------------|----|--------------------------|------------|------------|
| C  | 42.4232340 | 43.7822625 | 26.1656003 | O  | 40.9186742               | 47.9870492 | 33.8205927 |
| N  | 42.8724558 | 42.9203961 | 27.1422723 | O  | 41.8511771               | 46.5110322 | 35.2270012 |
| H  | 43.0566667 | 41.9119137 | 27.0445094 | C  | 45.6596521               | 47.1495422 | 33.4762198 |
| C  | 43.0732276 | 43.6323835 | 28.2681968 | O  | 46.3919201               | 48.1212001 | 33.4068079 |
| H  | 43.3886066 | 43.1843940 | 29.2077592 | H  | 45.4330029               | 47.6904013 | 36.3277695 |
| N  | 42.7780786 | 44.9152339 | 28.0754962 | H  | 45.7460465               | 46.2376857 | 32.8853561 |
| C  | 42.3643744 | 45.0196243 | 26.7591842 | H  | 47.5322401               | 45.7208057 | 27.1583630 |
| H  | 42.0198134 | 45.9587161 | 26.3322196 | H  | 42.1415865               | 43.4760512 | 25.1581403 |
| Fe | 42.7966766 | 46.7554017 | 29.3354059 |    |                          |            |            |
| O  | 43.1286444 | 47.0042958 | 31.0682728 |    | <b>TS<sub>pros</sub></b> |            |            |
| O  | 40.1898802 | 47.7263393 | 27.4790884 | C  | 46.5950877               | 46.2184502 | 27.2938044 |
| C  | 41.0114536 | 48.6163454 | 27.7412989 | N  | 45.9577787               | 47.0174442 | 26.3714119 |
| C  | 39.5722194 | 50.3592659 | 26.4725069 | H  | 46.2795081               | 47.2063351 | 25.4106620 |
| C  | 38.9256470 | 51.7439141 | 26.6648119 | C  | 44.8181715               | 47.4648470 | 26.9351186 |
| O  | 42.1510605 | 48.3822924 | 28.3333328 | H  | 44.1032580               | 48.1118567 | 26.4333900 |
| O  | 38.4850678 | 52.3137054 | 25.6313094 | N  | 44.6882118               | 46.9923482 | 28.1720893 |
| C  | 40.7175796 | 50.0795118 | 27.4436959 | C  | 45.7909296               | 46.2075631 | 28.4064662 |
| O  | 38.8206372 | 52.2301904 | 27.8116571 | H  | 45.9058244               | 45.6670664 | 29.3393926 |
| H  | 39.8834194 | 50.2555311 | 25.4225755 | C  | 42.3909662               | 43.8000418 | 26.0867206 |
| H  | 38.7736291 | 49.6170726 | 26.6388274 | N  | 42.8835520               | 42.9497218 | 27.0514385 |
| H  | 40.4383411 | 50.5281409 | 28.4128852 | H  | 43.0904738               | 41.9459493 | 26.9518724 |
| H  | 41.6516311 | 50.5746974 | 27.1371610 | C  | 43.0948558               | 43.6637740 | 28.1719284 |
| O  | 40.7992859 | 46.2145994 | 29.5575943 | H  | 43.4603268               | 43.2215053 | 29.0950119 |
| H  | 40.3936707 | 46.3668916 | 28.6729048 | N  | 42.7596020               | 44.9396686 | 27.9895906 |
| H  | 40.7235852 | 45.2064928 | 29.8378864 | C  | 42.3135336               | 45.0357691 | 26.6826761 |
| N  | 44.7186502 | 47.9741135 | 35.6880983 | H  | 41.9391652               | 45.9675907 | 26.2647154 |
| H  | 44.6893405 | 48.9852932 | 35.5854616 | Fe | 42.8336023               | 46.7737619 | 29.2725057 |
| C  | 44.4733765 | 47.1660534 | 34.4694541 | O  | 43.2205780               | 47.1163132 | 30.9866955 |
| H  | 44.2259686 | 46.1435869 | 34.8034059 | O  | 40.1568499               | 47.6815426 | 27.5453247 |
| C  | 43.2648568 | 47.6782636 | 33.6973459 | C  | 40.9780046               | 48.5849129 | 27.7484802 |
| H  | 43.3546670 | 48.7445495 | 33.4403392 | C  | 39.5321255               | 50.3408312 | 26.4828811 |
| H  | 43.1944700 | 47.2313686 | 32.3025993 | C  | 38.9086973               | 51.7487933 | 26.6948275 |
| C  | 41.8980577 | 47.3571918 | 34.2946336 | O  | 42.1490067               | 48.3654006 | 28.2966786 |
|    |            |            |            | O  | 38.4411026               | 52.3029847 | 25.6722413 |

C 40.6753620 50.0433822 27.4482070  
O 38.8750763 52.2152975 27.8570639  
H 39.8374288 50.2411990 25.4311305  
H 38.7218273 49.6111644 26.6487012  
H 40.3853576 50.4951377 28.4157459  
H 41.6096780 50.5439747 27.1508725  
O 40.8583309 46.1653865 29.6333352  
H 40.4045497 46.2796846 28.7681796  
H 40.8292041 45.1898512 29.9519032  
N 44.7961664 47.8055748 35.5131639  
H 44.8190374 48.7943413 35.2610423  
C 44.6349322 46.8517031 34.3947116  
H 44.7168995 45.8364532 34.8243959  
C 43.2743973 46.8279354 33.6384606  
H 43.2512090 47.1990214 32.2680369  
H 43.1248037 45.7790744 33.3331028  
C 41.9827426 47.1979972 34.3782510  
O 41.1234660 47.9303158 33.8542670  
O 41.8707438 46.5737949 35.4696379  
C 45.7669590 46.9748028 33.3290194  
O 46.4455157 47.9818589 33.3068296  
H 45.4622553 47.5770708 36.2231520  
H 45.8991166 46.1181812 32.6681110  
H 47.5488644 45.7208558 27.1183737  
H 42.1206549 43.4820886 25.0797927

**IM4**

C 46.4332178 46.1873906 27.1151387  
N 45.8301442 46.9057743 26.1089372  
H 46.2219220 47.0870350 25.1732125  
C 44.6231193 47.2996918 26.5489869  
H 43.9199667 47.8826449 25.9583427  
N 44.4116890 46.8656351 27.7889413

C 45.5383520 46.1649297 28.1574952  
H 45.6256889 45.6905319 29.1327325  
C 42.1856090 43.5744029 25.6983937  
N 42.6584733 42.8108571 26.7423713  
H 42.9307949 41.8172017 26.7183056  
C 42.7552299 43.5994015 27.8259955  
H 43.0645001 43.2405864 28.8053029  
N 42.3728172 44.8406919 27.5301598  
C 42.0084245 44.8373074 26.1989408  
H 41.6294413 45.7248383 25.6958425  
Fe 42.4509305 46.6387019 28.6333448  
O 42.7908481 46.7896403 30.4610972  
O 39.7432139 47.8474849 27.2156604  
C 40.6649787 48.6579942 27.3655411  
C 39.3368880 50.6034365 26.2738419  
C 38.7652437 51.9877490 26.7063966  
O 41.8525935 48.2986302 27.7986953  
O 38.1762649 52.6312400 25.8141379  
C 40.4924056 50.1462362 27.1552966  
O 38.9014394 52.3245000 27.9077164  
H 39.6097781 50.6520318 25.2096485  
H 38.5054576 49.8841221 26.3542033  
H 40.2737450 50.5638236 28.1593524  
H 41.4557295 50.5818627 26.8493217  
O 40.4699925 46.1932431 29.2122202  
H 39.9061391 46.3312096 28.4233315  
H 40.4641520 45.2045459 29.5514961  
N 44.6538058 48.0203142 35.9783531  
H 44.5586328 49.0315158 35.9304983  
C 44.3778600 47.2539980 34.7535414  
H 44.1024145 46.2297961 35.0621782  
C 43.1647968 47.8604023 34.1225811  
H 43.2759995 48.6972356 33.4289704

|   |            |            |            |   |            |            |            |
|---|------------|------------|------------|---|------------|------------|------------|
| H | 41.9335975 | 46.8348968 | 30.9191933 | C | 38.9458564 | 51.7480314 | 26.7546831 |
| C | 41.8004478 | 47.4101227 | 34.4782386 | O | 42.2663381 | 48.4257010 | 28.3514079 |
| O | 40.8440388 | 47.9668223 | 33.8695652 | O | 38.4239743 | 52.2743975 | 25.7482486 |
| O | 41.7003877 | 46.5018090 | 35.3517989 | C | 40.7690750 | 50.0749060 | 27.4709833 |
| C | 45.5293487 | 47.2321107 | 33.7112069 | O | 38.9592606 | 52.2131847 | 27.9216973 |
| O | 46.2719701 | 48.1955517 | 33.6321448 | H | 39.8759252 | 50.2467706 | 25.4729048 |
| H | 45.4353108 | 47.7456081 | 36.5384942 | H | 38.8058995 | 49.5970216 | 26.7207139 |
| H | 45.5971982 | 46.3322879 | 33.0998303 | H | 40.4931713 | 50.5713389 | 28.4209688 |
| H | 47.4111529 | 45.7172824 | 27.0116616 | H | 41.6941610 | 50.5629168 | 27.1292019 |
| H | 42.0261589 | 43.2160606 | 24.6814214 | O | 40.9845472 | 46.2965327 | 29.8250494 |

**TS<sub>REB</sub>**

|    |            |            |            |   |            |            |            |
|----|------------|------------|------------|---|------------|------------|------------|
| C  | 46.6941274 | 46.1837631 | 27.3425789 | H | 40.8407465 | 45.2826452 | 30.0331562 |
| N  | 46.0524906 | 47.0444496 | 26.4815362 | N | 44.7832917 | 48.0584279 | 35.5817061 |
| H  | 46.3456243 | 47.2584644 | 25.5168698 | H | 44.8668004 | 49.0609484 | 35.4301372 |
| C  | 44.9472931 | 47.4984704 | 27.1072670 | C | 44.5073883 | 47.2361349 | 34.3788757 |
| H  | 44.2336352 | 48.1894008 | 26.6650274 | H | 44.2479430 | 46.2217947 | 34.7255330 |
| N  | 44.8404179 | 46.9710165 | 28.3270755 | C | 43.2694122 | 47.8058708 | 33.7213575 |
| C  | 45.9264966 | 46.1413402 | 28.4784438 | H | 43.3520348 | 48.8129940 | 33.3122935 |
| H  | 46.0683139 | 45.5362874 | 29.3664584 | H | 42.0703975 | 47.2454043 | 31.7091034 |
| C  | 42.4236569 | 43.8044565 | 26.1190037 | C | 41.9040279 | 47.4097646 | 34.2435286 |
| N  | 42.8669412 | 42.9462710 | 27.1023197 | O | 40.9184385 | 47.9695133 | 33.6962397 |
| H  | 43.0490360 | 41.9370278 | 27.0123057 | O | 41.8732280 | 46.5778394 | 35.1848038 |
| C  | 43.0708206 | 43.6667285 | 28.2217339 | C | 45.6835239 | 47.2079593 | 33.3676025 |
| H  | 43.3845217 | 43.2228117 | 29.1639860 | O | 46.4141921 | 48.1780312 | 33.3000242 |
| N  | 42.7855803 | 44.9506434 | 28.0191789 | H | 45.4375047 | 47.7388666 | 36.2671676 |
| C  | 42.3743014 | 45.0474947 | 26.7026913 | H | 45.7763622 | 46.2856371 | 32.7942187 |
| H  | 42.0418027 | 45.9882598 | 26.2695665 | H | 47.6335288 | 45.6757956 | 27.1244953 |
| Fe | 42.9203350 | 46.7368154 | 29.2996454 | H | 42.1430467 | 43.4877011 | 25.1145186 |

**PD**

|   |            |            |            |   |            |            |            |
|---|------------|------------|------------|---|------------|------------|------------|
| O | 43.0325225 | 47.1806948 | 31.5539435 | C | 46.7388266 | 46.0681922 | 27.1640047 |
| O | 40.2331074 | 47.7331769 | 27.7484468 | N | 46.1002798 | 46.9025395 | 26.2760659 |
| C | 41.0851430 | 48.6377755 | 27.8485763 | H | 46.4312168 | 47.1462160 | 25.3309946 |
| C | 39.5963484 | 50.3433755 | 26.5321056 |   |            |            |            |

|    |            |            |            |   |            |            |            |
|----|------------|------------|------------|---|------------|------------|------------|
| C  | 44.9328394 | 47.2749694 | 26.8334096 | H | 44.2415172 | 46.1909513 | 34.8777800 |
| H  | 44.2120815 | 47.9381933 | 26.3597855 | C | 43.2238800 | 47.7819994 | 33.8769611 |
| N  | 44.7831791 | 46.7128812 | 28.0316659 | H | 43.3145253 | 48.8837091 | 33.8275501 |
| C  | 45.9070425 | 45.9506293 | 28.2490921 | H | 42.1504919 | 47.3525586 | 32.3231091 |
| H  | 46.0266646 | 45.3501560 | 29.1474056 | C | 41.8889877 | 47.4294817 | 34.5782294 |
| C  | 42.2452249 | 43.5317319 | 25.7195266 | O | 40.8971530 | 47.9745966 | 34.0366903 |
| N  | 42.7420376 | 42.7143488 | 26.7107679 | O | 41.8891063 | 46.5857342 | 35.5039202 |
| H  | 43.0025953 | 41.7212468 | 26.6402617 | C | 45.6757986 | 47.2238288 | 33.5578022 |
| C  | 42.8931893 | 43.4522449 | 27.8212036 | O | 46.3926466 | 48.2044796 | 33.4968587 |
| H  | 43.2555066 | 43.0506372 | 28.7635913 | H | 45.4289989 | 47.7263852 | 36.4036022 |
| N  | 42.5155116 | 44.7086780 | 27.6036900 | H | 45.7965112 | 46.3137112 | 32.9702815 |
| C  | 42.1052498 | 44.7720745 | 26.2874580 | H | 47.6918956 | 45.5789105 | 26.9631836 |
| H  | 41.7340371 | 45.6910510 | 25.8385789 | H | 42.0609788 | 43.2091775 | 24.6947934 |
| Fe | 42.8526044 | 46.3622330 | 28.8297804 |   |            |            |            |
| O  | 43.0991410 | 47.2563498 | 32.5358719 |   |            |            |            |
| O  | 40.0631275 | 47.7236101 | 28.3328191 |   |            |            |            |
| C  | 40.9959881 | 48.5241471 | 28.0843311 |   |            |            |            |
| C  | 39.5786918 | 50.1332622 | 26.5852337 |   |            |            |            |
| C  | 38.7668954 | 51.4580855 | 26.8271883 |   |            |            |            |
| O  | 42.2370452 | 48.2187630 | 28.2918717 |   |            |            |            |
| O  | 38.4306113 | 52.1042249 | 25.8223239 |   |            |            |            |
| C  | 40.6875606 | 49.9314251 | 27.6279058 |   |            |            |            |
| O  | 38.5153604 | 51.7111593 | 28.0416626 |   |            |            |            |
| H  | 39.9737437 | 50.1318980 | 25.5589514 |   |            |            |            |
| H  | 38.8588590 | 49.2984669 | 26.6602412 |   |            |            |            |
| H  | 40.3016661 | 50.4373607 | 28.5355577 |   |            |            |            |
| H  | 41.6204505 | 50.4308577 | 27.3336006 |   |            |            |            |
| O  | 41.2171354 | 46.3023790 | 30.1478838 |   |            |            |            |
| H  | 40.5464659 | 46.6919578 | 29.5046836 |   |            |            |            |
| H  | 41.0442093 | 45.3185754 | 30.3252316 |   |            |            |            |
| N  | 44.7167942 | 48.0190617 | 35.7655767 |   |            |            |            |
| H  | 44.7239511 | 49.0296191 | 35.6494938 |   |            |            |            |
| C  | 44.4889238 | 47.2198322 | 34.5590435 |   |            |            |            |
